# Supplementary material for: Stepwise evolution and convergent recombination underlie the global dissemination of carbapenemase-producing Escherichia coli
Source: Genome Med. 2020 Jan 20;12:10. doi: 10.1186/s13073-019-0699-6 (PMC6970295; doi:10.1186/s13073-019-0699-6)
Supplement: Supplementary file 1 — Additional file 1: Table S1. Characteristics of the E. coli isolates analysed in this work. [file 13073_2019_699_MOESM1_ESM.xls]

## Sheet: Table S1
Table S1 Characteristics of the ST410 E. coli isolates analysed in this work
Name	year	Origin	Repatriated	Source	Acc Nbr	carbapenemase	CTX-M ESBL	ftsI§,@	ompC@	ompF#,@	gyrA@	parC@	notes	ARG&	nbr_uniq_ARG
ANSES29401	2012	France		Unknown	GCA_900489745	-	-							strB; sul2; blaTEM-1B; aph(3')-Ia; strA; tet(A)	6
ANSES30599	2012	France		Unknown	GCA_900489815	-	-							aph(3')-Ia; sul2; strA; strB; blaTEM-1B; tet(A)	6
ANSES32139	2012	France		Unknown	GCA_900489735	-	blaCTX-M-15				S83L/D87N	S80I/E84		aac(6')Ib-cr; dfrA17; sul2; blaCTX-M-15; aadA5; aac(3)-IId; strA; sul1; strB; tet(B); blaTEM-1B; blaOXA-1; mph(A)	13
CNR17I10	2013-02-01	France	India	Rectal Swap	GCA_900488885	blaNDM-4	blaCTX-M-15	YRIK			S83L/D87N	S80I/E84		aac(3)-IIa; blaCTX-M-15; aac(6')Ib-cr; rmtB; dfrA12; tet(A); blaCMY-42; aadA2; mph(A); sul1; blaTEM-1B; blaOXA-1; blaNDM-4	13
CNR1J3	2012-02-27	France	Algeria	Urine	GCA_900488855	blaOXA-48	-				S83L/D87N	S80I/E84		strB; catA1; tet(B); blaOXA-48; dfrA17; aadA5; sul2; aph(3')-Ia; blaTEM-1B; strA	10
CNR34A5	2013-10-21	France	Chad	Rectal Swap	GCA_900488865	blaOXA-181	blaCTX-M-15	YRIN_349-532	R195L	-46; C->T (OmpR F3)	S83L/D87N	S80I/E84	Redundant	QnrS1; aac(6')Ib-cr; blaTEM-1B; dfrA17; mph(A); sul2; aadA5; aac(3)-IId; blaCTX-M-15; strA; blaCMY-2; sul1; strB; blaOXA-181; blaOXA-1; tet(B)	16
CNR34E8	2013-10-24	France	Niger	Rectal Swap	GCA_900488875	blaOXA-181	blaCTX-M-15	YRIN_349-532	R195L	-46; C->T (OmpR F3)	S83L/D87N	S80I/E84		tet(B); QnrS1; aac(6')Ib-cr; blaTEM-1B; dfrA17; mph(A); sul2; aph(3')-Ic; aadA5; aac(3)-IId; blaCTX-M-15; strA; sul1; strB; blaCMY-2; blaOXA-181; blaOXA-1	17
CNR35E2	2013-11-06	France	Canada	Urine	GCA_900488895	blaOXA-181	blaCTX-M-15	YRIN_349-532	R195L	-46; C->T (OmpR F3)	S83L/D87N	S80I/E84	Redundant	tet(B); QnrS1; aac(6')Ib-cr; blaTEM-1B; dfrA17; mph(A); blaCMY-2; sul2; aadA5; aac(3)-IId; blaCTX-M-15; strA; sul1; strB; blaOXA-181; blaOXA-1	16
CNR37A7	2013-11-25	France	Mauritius	Urine	GCA_900488915	blaOXA-181	-	YRIN_349-532	R195L	-46; C->T (OmpR F3)	S83L/D87N	S80I/E84	Redundant	strB; tet(B); QnrS1; dfrA17; mph(A); aac(6')Ib-cr; sul2; aadA5; aac(3)-IId; blaCMY-2; sul1; blaTEM-1B; blaOXA-1; blaOXA-181; strA	15
CNR38E10	2013-12-11	France		Urine	GCA_900488905	blaOXA-181	blaCTX-M-15	YRIN_349-532	R195L	-46; C->T (OmpR F3)	S83L/D87N	S80I/E84		strB; QnrS1; aac(6')Ib-cr; blaCMY-2; sul2; aac(3)-IId; aadA5; mph(A); dfrA17; blaCTX-M-15; tet(B); blaTEM-1B; blaOXA-181; blaOXA-1; strA; sul1	16
CNR40H9	2014-10-01	France		Urine	GCA_900488955	blaOXA-181	blaCTX-M-15	YRIN_349-532	R195L	-46; C->T (OmpR F3)	S83L/D87N	S80I/E84		tet(B); aac(6')Ib-cr; blaTEM-1B; dfrA17; sul2; aadA5; aac(3)-IId; blaCTX-M-15; strA; sul1; strB; blaOXA-181; blaCMY-2; blaOXA-1	14
CNR47F2	2014-04-09	France	Pakistan	Rectal Swap	GCA_900488985	blaOXA-181	blaCTX-M-15	YRIN_349-532	R195L	-46; C->T (OmpR F3)	S83L/D87N	S80I/E84		strB; strA; aac(3)-IId; sul2; blaCMY-2; tet(B); aac(6')Ib-cr; aadA5; blaCTX-M-15; dfrA17; blaTEM-1B; QnrS1; blaOXA-181; mph(A); blaOXA-1; sul1	16
CNR49A5	2014-04-30	France		Rectal Swap	GCA_900488925	blaNDM-5	blaCTX-M-15	YRIK			S83L/D87N	S80I/E84		aadA2; dfrA17; blaCTX-M-15; aac(6')Ib-cr; tet(A); erm(B); strA; tet(B); sul1; blaNDM-5; blaTEM-1B; sul2; blaCMY-42; blaOXA-1; aadA5; strB; mph(A); qepA; dfrA12	19
CNR54E1	2014-07-10	France		Rectal Swap	GCA_900488935	blaOXA-181	blaCTX-M-15	YRIN_349-532	R195L	-46; C->T (OmpR F3)	S83L/D87N	S80I/E84	Redundant	tet(B); QnrS1; aac(6')Ib-cr; blaTEM-1B; dfrA17; sul2; aadA5; aac(3)-IId; blaCTX-M-15; strA; sul1; strB; blaCMY-2; blaOXA-181; blaOXA-1	15
CNR58B3	2014-08-26	France		Urine	GCA_900490465	blaOXA-181	blaCTX-M-55	YRIN_349-532	R195L	-46; C->T (OmpR F3)	S83L/D87N	S80I/E84	Redundant	QnrS1; aac(6')Ib-cr; blaTEM-1B; dfrA17; mph(A); blaCMY-2; fosA; sul2; aadA5; aac(3)-IId; blaCTX-M-55; strA; sul1; strB; blaOXA-181; blaOXA-1; tet(B)	17
CNR59F5	2014-09-08	France	Mali	Rectal Swap	GCA_900489065	blaOXA-181	blaCTX-M-15	YRIN_349-532	R195L	-46; C->T (OmpR F3)	S83L/D87N	S80I/E84		QnrS1; aac(6')Ib-cr; aadA5; blaCTX-M-15; blaCMY-2; dfrA17; blaOXA-181; tet(B); blaTEM-1B; blaOXA-1; sul1	11
CNR60F5	2014-09-16	France		Rectal Swap	GCA_900489245	blaOXA-48	-		frameshift					aadA2; dfrA12; dfrA14; tet(A); aph(3')-Ia; sul3; blaTEM-33; mph(A); aadA1; cml; blaOXA-48	11
CNR61A10	2014-09-24	France	India	Rectal Swap	GCA_900489045	blaOXA-181	blaCTX-M-15	YRIN_349-532	R195L	-46; C->T (OmpR F3)	S83L/D87N	S80I/E84		tet(B); QnrS1; aac(6')Ib-cr; blaTEM-1B; dfrA17; mph(A); sul2; aadA5; aac(3)-IId; blaCTX-M-15; strA; sul1; strB; blaCMY-2; blaOXA-181; blaOXA-1	16
CNR61D1	2014-09-26	France		Urine	GCA_900490445	blaOXA-181	blaCTX-M-15	YRIN_349-532	R195L	-46; C->T (OmpR F3)	S83L/D87N	S80I/E84		aac(3)-IId; blaTEM-1B; dfrA14; blaCMY-2; QnrS1; blaOXA-181; sul1; blaOXA-1; mph(A); blaCTX-M-15; aadA5; aac(6')Ib-cr; dfrA17; sul2; strA; strB; tet(B)	17
CNR61H6	2014-10-01	France		Urine	GCA_900489155	blaOXA-181	blaCTX-M-15	YRIN_349-532	R195L	-46; C->T (OmpR F3)	S83L/D87N	S80I/E84	Redundant	tet(B); QnrS1; aac(6')Ib-cr; blaTEM-1B; dfrA17; mph(A); sul2; aadA5; aac(3)-IId; blaCTX-M-15; sul1; blaCMY-2; blaOXA-181; blaOXA-1; strB; strA	16
CNR63F1	2014-10-17	France	Gabon	Rectal Swap	GCA_900489125	blaOXA-181	blaCTX-M-15	YRIN_349-532	R195L	-46; C->T (OmpR F3)	S83L/D87N	S80I/E84	Redundant	strB; aac(3)-IId; QnrS1; aac(6')Ib-cr; sul2; aadA5; blaCMY-2; mph(A); dfrA17; blaTEM-1B; tet(B); blaCTX-M-15; blaOXA-181; strA; sul1	15
CNR63G9	2014-10-20	France		Unknown	GCA_900489145	blaOXA-181	-	YRIN_349-532	R195L	-46; C->T (OmpR F3)	S83L/D87N	S80I/E84		QnrS1; tet(B); aadA5; dfrA17; blaOXA-181; sul1	6
CNR64C4	2014-10-24	France	Gabon	Rectal Swap	GCA_900489225	blaOXA-181	blaCTX-M-15	YRIN_349-532	frameshift	-46; C->T (OmpR F3)	S83L/D87N	S80I/E84		strB; aac(3)-IId; QnrS1; aac(6')Ib-cr; sul2; aadA5; blaCTX-M-15; blaCMY-2; mph(A); dfrA17; blaTEM-1B; blaOXA-181; blaOXA-1; tet(B); strA; sul1	16
CNR67B6	2014-11-26	France		Urine	GCA_900489195	blaOXA-181	blaCTX-M-15	YRIN_349-532	R195L	-46; C->T (OmpR F3)	S83L/D87N	S80I/E84		QnrS1; dfrA17; aadA5; blaCMY-2; sul1; blaCTX-M-15; aac(6')Ib-cr; blaTEM-1B; blaOXA-181; tet(B)	10
CNR75E10	2015-03-09	France	Mali/Senegal	Urine	GCA_900489095	blaOXA-181	blaCTX-M-15	YRIN_349-532	R195L	-46; C->T (OmpR F3)	S83L/D87N	S80I/E84	Redundant	QnrS1; aac(6')Ib-cr; blaTEM-1B; dfrA17; mph(A); sul2; aadA5; aac(3)-IId; blaCTX-M-15; strA; sul1; strB; blaCMY-2; blaOXA-181; blaOXA-1; tet(B)	16
CNR76F9	2015-03-24	France	Ivory Coast	Rectal Swap	GCA_900489215	blaOXA-181	blaCTX-M-15	YRIN_349-532	R195L	-46; C->T (OmpR F3)	S83L/D87N	S80I/E84	Redundant	tet(B); QnrS1; aac(6')Ib-cr; dfrA17; mph(A); sul2; aadA5; aac(3)-IId; strA; blaCTX-M-15; sul1; strB; blaCMY-2; blaTEM-1B; blaOXA-181; blaOXA-1	16
CNR77J4	2015-04-10	France	Senegal	Rectal Swap	GCA_900489105	blaOXA-181	blaCTX-M-15	YRIN_349-532	R195L	-46; C->T (OmpR F3)	S83L/D87N	S80I/E84	Redundant	QnrS1; aac(6')Ib-cr; blaTEM-1B; dfrA17; mph(A); dfrA14; blaCMY-2; aadA5; aac(3)-IId; blaCTX-M-15; sul2; sul1; blaOXA-181; blaOXA-1; tet(B); strB	16
CNR78B2	2015-04-14	France		Rectal Swap	GCA_900489185	blaOXA-181	-	YRIN_349-532	R195L	-46; C->T (OmpR F3)	S83L/D87N	S80I/E84		QnrS1; blaCMY-2; blaOXA-181	3
CNR78B4	2015-04-14	France		Rectal Swap	GCA_900489325	blaOXA-181;blaNDM-5	blaCTX-M-15	YRIN_349-532	R195L	-46; C->T (OmpR F3)	S83L/D87N	S80I/E84		dfrA17; QnrS1; aac(6')Ib-cr; blaCMY-2; sul1; mph(A); erm(B); blaCTX-M-15; blaTEM-1B; blaNDM-5; aadA5; blaOXA-181; blaOXA-1; tet(B); dfrA12; aadA2	16
CNR78B6	2015-04-14	France		Rectal Swap	GCA_900489315	blaOXA-181	-	YRIN_349-532	R195L	-46; C->T (OmpR F3)	S83L/D87N	S80I/E84		QnrS1; mph(A); erm(B); blaTEM-1B; sul1; blaSHV-1; blaCMY-2; blaOXA-181	8
CNR78F5	2015-04-20	France	Sri Lanka	Rectal Swap	GCA_900489425	blaOXA-181	blaCTX-M-15	YRIN_349-532	R195L	-46; C->T (OmpR F3)	S83L/D87N	S80I/E84		tet(B); QnrS1; aac(6')Ib-cr; dfrA17; sul1; blaCTX-M-15; aadA5; blaCMY-2; mph(A); QnrB4; blaDHA-1; blaOXA-181; blaOXA-1; blaTEM-1B	14
CNR79J3	2015-05-12	France		Rectal Swap	GCA_900489285	blaOXA-181	blaCTX-M-15	YRIN_349-532	R195L	-46; C->T (OmpR F3)	S83L/D87N	S80I/E84		QnrS1; tet(B); aac(6')Ib-cr; dfrA17; mph(A); sul2; aadA5; aac(3)-IId; blaCTX-M-15; strA; blaCMY-2; sul1; strB; blaTEM-1B; blaOXA-181; blaOXA-1	16
CNR81C8	2015-06-04	France		Urine	GCA_900489305	blaOXA-181	blaCTX-M-15	YRIN_349-532	R195L	-46; C->T (OmpR F3)	S83L/D87N	S80I/E84		aac(3)-IId; QnrS1; tet(B); aac(6')Ib-cr; blaTEM-1B; dfrA17; mph(A); strB; aadA5; blaCTX-M-15; sul1; sul2; blaCMY-4; blaOXA-181; dfrA8; blaOXA-1; strA	17
CNR81H6	2015-06-10	France	Tanzania	Rectal Swap	GCA_900489295	blaOXA-181	blaCTX-M-15	YRIN_349-532	R195L	-46; C->T (OmpR F3)	S83L/D87N	S80I/E84	Redundant	QnrS1; aac(6')Ib-cr; blaTEM-1B; dfrA17; mph(A); sul2; blaCMY-2; aadA5; aac(3)-IId; blaCTX-M-15; strA; sul1; strB; tet(B); blaOXA-181; blaOXA-1	16
CNR82A2	2015-06-15	France	Cameroon	Rectal Swap	GCA_900489415	blaOXA-181	blaCTX-M-55	YRIN_349-532	R195L	-46; C->T (OmpR F3)	S83L/D87N	S80I/E84		strB; QnrS1; catA2; aac(6')Ib-cr; mph(A); sul2; blaCTX-M-55; aac(3)-IId; blaCMY-2; blaOXA-181; blaOXA-1; tet(B); strA	13
CNR82B7	2015-06-17	France		Rectal Swap	GCA_900489455	blaOXA-181	blaCTX-M-15	YRIN_349-532	R195L	-46; C->T (OmpR F3)	S83L/D87N	S80I/E84		QnrS1; aac(6')Ib-cr; blaTEM-1B; dfrA17; mph(A); sul2; aadA5; aac(3)-IId; blaCTX-M-15; strA; sul1; strB; blaCMY-2; blaOXA-181; blaOXA-1; tet(B)	16
CNR82D6	2015-06-22	France		Rectal Swap	GCA_900489365	blaOXA-181	blaCTX-M-15	YRIN_349-532	R195L	-46; C->T (OmpR F3)	S83L/D87N	S80I/E84	Redundant	QnrS1; blaTEM-1B; dfrA17; mph(A); aac(6')Ib-cr; sul2; aadA5; aac(3)-IId; blaCTX-M-15; strA; blaCMY-2; sul1; strB; blaOXA-1; blaOXA-181; tet(B)	16
CNR82D7	2015-06-22	France		Rectal Swap	GCA_900489405	blaOXA-181	blaCTX-M-15	YRIN_349-532	R195L	-46; C->T (OmpR F3)	S83L/D87N	S80I/E84	Redundant	tet(B); QnrS1; blaCMY-2; blaTEM-1B; dfrA17; mph(A); aac(6')Ib-cr; sul2; aadA5; aac(3)-IId; blaCTX-M-15; strA; sul1; strB; blaOXA-1; blaOXA-181	16
CNR83B9	2015-07-01	France		Rectal Swap	GCA_900489475	blaOXA-181	blaCTX-M-15	YRIN_349-532	R195L	-46; C->T (OmpR F3)	S83L/D87N	S80I/E84	Redundant	QnrS1; aac(6')Ib-cr; blaTEM-1B; dfrA17; mph(A); blaCMY-2; sul2; aadA5; aac(3)-IId; blaCTX-M-15; strA; strB; QnrB4; blaDHA-1; blaOXA-181; sul1; blaOXA-1; tet(B)	18
CNR84G4	2015-07-22	France	Cameroon	Rectal Swap	GCA_900489385	blaOXA-181	blaCTX-M-55	YRIN_349-532	R195L	-46; C->T (OmpR F3)	S83L/D87N	S80I/E84		QnrS1; catA2; blaTEM-1B; dfrA17; mph(A); aac(6')Ib-cr; blaCMY-2; sul2; aadA5; aac(3)-IId; blaCTX-M-55; strA; sul1; strB; blaOXA-1; blaOXA-181; tet(B)	17
CNR85J3	2015-08-11	France	Senegal	Rectal Swap	GCA_900489535	blaOXA-181	blaCTX-M-15	YRIN_349-532	R195L	-46; C->T (OmpR F3)	S83L/D87N	S80I/E84		QnrS1; aac(6')Ib-cr; blaTEM-1B; dfrA17; mph(A); blaCMY-2; sul2; aadA5; aac(3)-IId; strA; sul1; strB; blaCTX-M-15; blaOXA-181; blaOXA-1; tet(B)	16
CNR86J7	2015-08-24	France	Senegal	Rectal Swap	GCA_900489335	blaOXA-181	blaCTX-M-15	YRIN_349-532	R195L	-46; C->T (OmpR F3)	S83L/D87N	S80I/E84	Redundant	QnrS1; tet(B); aac(6')Ib-cr; blaTEM-1B; dfrA17; mph(A); sul2; aadA5; aac(3)-IId; blaCTX-M-15; strA; blaCMY-2; sul1; strB; blaOXA-181; blaOXA-1	16
CNR89H2	2015-09-21	France		Rectal Swap	GCA_900489355	blaOXA-181	blaCTX-M-15	YRIN_349-532	R195L	-46; C->T (OmpR F3)	S83L/D87N	S80I/E84		QnrS1; aac(6')Ib-cr; dfrA17; mph(A); blaCMY-2; sul2; aadA5; strA; sul1; strB; erm(B); blaCTX-M-15; blaTEM-1B; blaOXA-181; tet(B); blaOXA-1	16
CNR91A6	2015-10-05	France		Urine	GCA_900489445	blaOXA-181	blaCTX-M-15	YRIN_349-532	R195L	-46; C->T (OmpR F3)	S83L/D87N	S80I/E84	Redundant	QnrS1; aac(6')Ib-cr; dfrA17; aadA5; sul1; blaCTX-M-15; blaTEM-1B; blaCMY-2; blaOXA-181; blaOXA-1; tet(B)	11
CNR92B5	2015-10-14	France		Rectal Swap	GCA_900489345	blaOXA-181	-	YRIN_349-532	R195L	-46; C->T (OmpR F3)	S83L/D87N	S80I/E84		QnrS1; tet(B); dfrA17; mph(A); sul2; aadA5; aac(3)-IId; strA; sul1; strB; blaTEM-1B; blaCMY-2; blaOXA-181	13
CNR92B7	2015-10-14	France		Urine	GCA_900489585	blaOXA-181	blaCTX-M-15				S83L/D87N	S80I/E84		QnrS1; aac(6')Ib-cr; blaCTX-M-15; mph(A); sul1; blaOXA-181; aadA5; dfrA17; blaOXA-1; tet(A)	10
CNR93G1	2015-10-30	France		Rectal Swap	GCA_900489635	blaOXA-181	blaCTX-M-15				S83L/D87N	S80I/E84		QnrS1; aac(6')Ib-cr; mph(A); blaCTX-M-15; sul1; blaOXA-181; aadA5; dfrA17; blaOXA-1; tet(A)	10
CNR94G8	2015-11-12	France		Rectal Swap	GCA_900489605	blaOXA-181	blaCTX-M-15	YRIK			S83L/D87N	S80I/E84		QnrS1; sul2; blaCTX-M-15; mph(A); blaCMY-42; tet(A); blaOXA-181; sul1; aadA5; dfrA17	10
CNR96C1	2015-12-02	France		Rectal Swap	GCA_900490435	blaOXA-181	blaCTX-M-15	YRIN_349-532	R195L	-46; C->T (OmpR F3)	S83L/D87N	S80I/E84		QnrS1; aac(6')Ib-cr; blaTEM-1B; dfrA17; mph(A); sul2; blaCMY-2; aadA5; aac(3)-IId; blaCTX-M-15; strA; sul1; strB; blaOXA-181; blaOXA-1; tet(B)	16
CNR96F5	2015-12-05	France	Senegal	Rectal Swap	GCA_900489645	blaOXA-181	blaCTX-M-15	YRIN_349-532	R195L	-46; C->T (OmpR F3)	S83L/D87N	S80I/E84		QnrS1; dfrA17; aac(6')Ib-cr; aadA5; sul1; blaCMY-2; blaCTX-M-15; blaTEM-1B; blaOXA-181; blaOXA-1; tet(B)	11
CNRAL46B8	2014-03-24	France	Morocco	Rectal Swap	GCA_900489615	blaOXA-181	blaCTX-M-15	YRIN_349-532	R195L	-46; C->T (OmpR F3)	S83L/D87N	S80I/E84	Redundant	QnrS1; aac(6')Ib-cr; dfrA17; blaCMY-2; aadA5; sul1; blaCTX-M-15; blaTEM-1B; blaOXA-181; blaOXA-1; tet(B)	11
CNRAL46E4	2014-03-26	France		Rectal Swap	GCA_900489695	blaOXA-181	blaCTX-M-15	YRIN_349-532	R195L	-46; C->T (OmpR F3)	S83L/D87N	S80I/E84	Redundant	QnrS1; aac(6')Ib-cr; dfrA17; blaCMY-2; aadA5; sul1; blaCTX-M-15; blaTEM-1B; blaOXA-181; blaOXA-1; tet(B)	11
CNRC10O53	2011-12-06	France		Urine	GCA_900489435	blaOXA-48	-				S83L/D87N	S80I/E84		tet(A); blaOXA-48; sul2	3
Ec-MAD	2014-09-25	France		Unknown	GCA_901733115	blaOXA-181	blaCTX-M-15	YRIN_349-532	R195L	-46; C->T (OmpR F3)	S83L/D87N	S80I/E84		blaCMY-2; dfrA17; mph(A); aadA5; QnrS1; sul1; tet(B); aac(3)-IId; aac(6')Ib-cr; blaOXA-1; blaOXA-181; blaCTX-M-15; blaTEM-1B; sul2; strA; strB; blaTEM-1B	16
EcLb317	2013-09-19	Lebanon		Urine	GCA_900489375	blaOXA-181	blaCTX-M-15	YRIN_349-532	R195L	-46; C->T (OmpR F3)	S83L/D87N	S80I/E84		mph(A); sul2; blaOXA-181; blaCMY-2; aadA5; dfrA17; blaTEM-1B; strB; QnrS1; blaOXA-1; tet(B); aac(3)-IId; strA; sul1; aac(6')Ib-cr; blaCTX-M-15	16
EcLb474	2014-05-15	Lebanon		Rectal Swap	GCA_900489395	blaOXA-181	blaCTX-M-15	YRIN_349-532	R195L	-46; C->T (OmpR F3)	S83L/D87N	S80I/E84		QnrS1; aac(3)-IId; blaTEM-1B; aac(6')Ib-cr; sul2; aadA5; blaCTX-M-15; strA; blaCMY-2; dfrA17; strB; blaOXA-1; blaOXA-181; tet(B); sul1	15
EcLb504	2014-08-15	Lebanon		Urine	GCA_900489755	blaOXA-181	blaCTX-M-15	YRIN_349-532	R195L	-46; C->T (OmpR F3)	S83L/D87N	S80I/E84		aac(3)-IId; sul1; dfrA17; aac(6')Ib-cr; sul2; blaOXA-181; blaCTX-M-15; floR; blaTEM-1B; fosA; blaOXA-1; QnrS1; aadA5; tet(B); strB; strA	16
EcLb534	2014-09-09	Lebanon		Abdominal Gauze	GCA_900489775	blaOXA-181	blaCTX-M-15	YRIN_349-532	R195L	-46; C->T (OmpR F3)	S83L/D87N	S80I/E84		blaCTX-M-15; mph(A); aac(6')Ib-cr; sul2; aadA5; blaOXA-181; aac(3)-IId; dfrA17; blaTEM-1B; QnrS1; blaOXA-1; strB; tet(B); strA; sul1	15
§ ftsI mutations are as shown in Fig. 2; #mutations in the ompF regulatory region refer to position as defined by Huang et al. (1996); @mutations contributing to antibiotic resistance; &antibiotic resistance genes (ARG) detected in the genome
