# Supplementary material for: Stepwise evolution and convergent recombination underlie the global dissemination of carbapenemase-producing Escherichia coli
Source: Genome Med. 2020 Jan 20;12:10. doi: 10.1186/s13073-019-0699-6 (PMC6970295; doi:10.1186/s13073-019-0699-6)
Supplement: Supplementary file 2 — Additional file 2: Table S2. E. coli genome sequences retrieved from public databases. [file 13073_2019_699_MOESM2_ESM.xls]

## Sheet: table S2
Table S2. E. coli genome sequences retrieved from public databases and belonging to STs with at least one CP-Ec isolate or one isolate mutated in ftsI.
Assembly	Name	Origin	ST	source	Data type	carbapenemase	blaCTX-M ESBL	ftsI§	ompC&	ompF#	gyrA	parC	note@	ARG	nbr_uniq_ARG
GCF_000005845	K12		10	ncbi	Assembly								reference
GCA_000005845.2	K-12 substr. MG1655		10	ncbi	Assembly								Redundant		0
GCA_000010245.1	K-12 substr. W3110		10	ncbi	Assembly								Redundant		0
GCA_000022345.1	K-12 substr. BW2952		10	ncbi	Assembly								Redundant	aph(3')-Ia	1
GCA_000146735.1	K-12 substr. MG1655star		10	ncbi	Assembly						S83S/D87Y		Redundant		0
GCA_000164555.1	MS 196-1	not determined	10	ncbi	Assembly									dfrA12;aadA2;sul1;strB;strA;mph(A)	6
GCA_000194535.2	2.3916		10	ncbi	Assembly									aadA1;cmlA1;aph(3')-Ia;aadA2;tet(A)	5
GCA_000194555.2	2.4168		10	ncbi	Assembly										0
GCA_000194645.2	3.2303		10	ncbi	Assembly								Redundant		0
GCA_000194705.2	B41	USA	10	ncbi	Assembly									sul1;aadA13	2
GCA_000220005.2	UMNF18	USA	10	ncbi	Assembly									aph(3')-Ia;aadA2;dfrA12;aac(3)-IVa;aph(4)-Ia;blaTEM-1B;aadA1;cmlA1;aadA2	8
GCA_000224395.2	XH001		10	ncbi	Assembly									catA1;aph(3')-IIa;aph(3')-Ia;aph(6)-Ic;strB	5
GCA_000225145.2	STEC_EH250		10	ncbi	Assembly								Redundant		0
GCA_000225165.2	G58-1		10	ncbi	Assembly									tet(A)	1
GCA_000226585.1	XH140A		10	ncbi	Assembly									aph(3')-Ia	1
GCA_000249615.2	DEC6B		10	ncbi	Assembly										0
GCA_000249635.2	DEC6C		10	ncbi	Assembly										0
GCA_000249655.2	DEC6D		10	ncbi	Assembly										0
GCA_000249675.2	DEC6E		10	ncbi	Assembly								Redundant		0
GCA_000257275.1	P12b		10	ncbi	Assembly										0
GCA_000258865.1	J53		10	ncbi	Assembly								Redundant		0
GCA_000259425.1	P4	United Kingdom	10	ncbi	Assembly										0
GCA_000261145.1	M919		10	ncbi	Assembly									blaTEM-1B;aadA1	2
GCA_000261405.1	H730		10	ncbi	Assembly									sul2	1
GCA_000264155.1	75	USA	10	ncbi	Assembly						S83L/D87N	S80I/E84	Redundant	dfrA17;aadA5;strB;strA;sul2	5
GCA_000269645.2	K-12 substr. MG1655		10	ncbi	Assembly								Redundant		0
GCA_000273425.1	K-12 substr. MG1655		10	ncbi	Assembly								Redundant		0
GCA_000304075.2	TW15901		10	ncbi	Assembly										0
GCA_000304115.2	TW00353		10	ncbi	Assembly								Redundant	blaTEM-1C	1
GCA_000305175.1	8.0566		10	ncbi	Assembly										0
GCA_000305355.1	8.0569		10	ncbi	Assembly								Redundant		0
GCA_000326925.1	KTE120		10	ncbi	Assembly										0
GCA_000333175.1	ATCC 23506		10	ncbi	Assembly										0
GCA_000340255.1	S17	Brazil	10	ncbi	Assembly									tet(B);sul2;dfrA15	3
GCA_000350045.2	C43/90		10	ncbi	Assembly									tet(A);sul2;aph(3')-Ia;strA;catA1;strB;blaTEM-1B	7
GCA_000350185.1	K-12 substr. MDS42		10	ncbi	Assembly								Redundant		0
GCA_000350885.1	KTE44		10	ncbi	Assembly										0
GCA_000351525.1	KTE56	Denmark	10	ncbi	Assembly				recombined (not phylogroup D)						0
GCA_000351725.1	KTE77	Denmark	10	ncbi	Assembly										0
GCA_000351865.1	KTE111	Denmark	10	ncbi	Assembly				recombined (not phylogroup D)						0
GCA_000351965.1	KTE156	Denmark	10	ncbi	Assembly									mcr-9	1
GCA_000351985.1	KTE161	Denmark	10	ncbi	Assembly										0
GCA_000352185.1	KTE42		10	ncbi	Assembly									tet(B)	1
GCA_000352945.1	KTE197		10	ncbi	Assembly										0
GCA_000356145.2	2726950		10	ncbi	Assembly						S83L/D87			sul2;strA;strB;blaTEM-1B;dfrA8	5
GCA_000356185.2	2722950		10	ncbi	Assembly						S83L/D87			sul2;blaTEM-1B;strA;strB	4
GCA_000356285.2	BCE011_MS-01		10	ncbi	Assembly						S83A/D87			dfrA8;blaTEM-1B	2
GCA_000364365.1	K-12 substr. MG1655		10	ncbi	Assembly								Redundant		0
GCA_000407745.1	KTE35		10	ncbi	Assembly								Redundant	sul1;aadA2;dfrA12;mph(A)	4
GCA_000407805.1	KTE14		10	ncbi	Assembly										0
GCA_000407945.1	KTE34		10	ncbi	Assembly									dfrA12;aadA2;sul1;mph(A)	4
GCA_000408025.1	KTE40		10	ncbi	Assembly										0
GCA_000408045.1	KTE41		10	ncbi	Assembly										0
GCA_000408145.1	KTE198		10	ncbi	Assembly								Redundant		0
GCA_000408345.1	KTE61	Denmark	10	ncbi	Assembly										0
GCA_000408785.1	KTE155	Denmark	10	ncbi	Assembly								Redundant		0
GCA_000446225.2	C213_10	Denmark	10	ncbi	Assembly										0
GCA_000446325.2	C260_92	Italy	10	ncbi	Assembly										0
GCA_000446585.2	C496_10	Denmark	10	ncbi	Assembly						S83L/D87				0
GCA_000458495.1	HVH 164 (4-5953081)	Denmark	10	ncbi	Assembly										0
GCA_000460275.1	UMEA 3139-1	Sweden	10	ncbi	Assembly									strA;strB	2
GCA_000460335.1	UMEA 3150-1	Sweden	10	ncbi	Assembly									tet(A)	1
GCA_000460555.1	UMEA 3174-1	Sweden	10	ncbi	Assembly										0
GCA_000460635.1	UMEA 3180-1	Sweden	10	ncbi	Assembly									blaTEM-1D	1
GCA_000460715.1	UMEA 3199-1	Sweden	10	ncbi	Assembly				recombined (not phylogroup D)				Redundant		0
GCA_000461115.1	UMEA 3271-1	Sweden	10	ncbi	Assembly									tet(A);tet(A)	1
GCA_000461235.1	UMEA 3318-1	Sweden	10	ncbi	Assembly				recombined (not phylogroup D)					dfrA1;aadA1;strB;mcr-9	4
GCA_000461395.1	UMEA 3592-1	Sweden	10	ncbi	Assembly										0
GCA_000461415.1	UMEA 3609-1	Sweden	10	ncbi	Assembly								Redundant		0
GCA_000461755.1	UMEA 3889-1	Sweden	10	ncbi	Assembly										0
GCA_000474035.1	C321.deltaA		10	ncbi	Assembly									blaTEM-116	1
GCA_000482265.1	K-12 substr. MG1655		10	ncbi	Assembly								Redundant		0
GCA_000495075.1	UMEA 3148-1	Sweden	10	ncbi	Assembly				recombined (not phylogroup D)						0
GCA_000498235.1	ECC-Z	USA: NY	10	ncbi	Assembly										0
GCA_000499485.1	K-12 substr. MC4100		10	ncbi	Assembly								Redundant		0
GCA_000503315.1	320		10	ncbi	Assembly									blaTEM-20;dfrA5;sul2;aph(3')-Ia;tet(A);strB;strA	7
GCA_000503335.1	681		10	ncbi	Assembly								Redundant	aph(3')-Ia;tet(A);sul2;blaTEM-20;dfrA5;strB;strA	7
GCA_000503355.1	38.27		10	ncbi	Assembly		blaCTX-M-1							sul2;blaCTX-M-1;mph(E);sul1;msr(E);tet(B);catA2;dfrA1	8
GCA_000503375.1	38.34		10	ncbi	Assembly				deletion	frameshift	S83L/D87			sul2;blaTEM-1B;mph(B);catA1;strA;tet(A);strB;dfrA1;aadA1;sul1	10
GCA_000503395.1	53A		10	ncbi	Assembly		blaCTX-M-1							blaCTX-M-1;dfrA17;sul2;aadA5	4
GCA_000503415.1	85B		10	ncbi	Assembly						S83L/D87			mph(B);blaTEM-52C	2
GCA_000511425.1	148		10	ncbi	Assembly		blaCTX-M-1				S83L/D87N	S80I/E84		sul2;blaTEM-1B;sul1;tet(B);strB;blaCTX-M-1;aadA1;dfrA1;dfrA17;strA;catA1	11
GCA_000517165.1	K-12 substr. MG1655		10	ncbi	Assembly								Redundant	tet(B)	1
GCA_000601155.1	1-110-08_S3_C1	Tanzania	10	ncbi	Assembly						S83A/D87				0
GCA_000601175.1	1-110-08_S3_C2	Tanzania	10	ncbi	Assembly						S83A/D87				0
GCA_000601215.1	1-110-08_S4_C2	Tanzania	10	ncbi	Assembly									sul2;blaTEM-1B;strA;strB;blaTEM-1B;blaTEM-1B;dfrA8;mph(A)	6
GCA_000601235.1	1-110-08_S4_C3	Tanzania	10	ncbi	Assembly									blaTEM-1B;strB;dfrA8;strA;blaTEM-1B;mph(A);sul2;blaTEM-1B	6
GCA_000601255.1	1-176-05_S1_C1	Tanzania	10	ncbi	Assembly				recombined (not phylogroup D)					dfrA7;sul2;sul1;strA;strB;blaTEM-1B;tet(A);catA1	8
GCA_000601295.1	1-110-08_S1_C3	Tanzania	10	ncbi	Assembly									blaTEM-1B;tet(A);strA;dfrA7;sul2;sul1;strB	7
GCA_000601315.1	1-110-08_S1_C1		10	ncbi	Assembly										0
GCA_000601335.1	1-110-08_S3_C3	Tanzania	10	ncbi	Assembly						S83A/D87				0
GCA_000618005.2	98-3133	USA	10	ncbi	Assembly								Redundant		0
GCA_000627135.1	1-176-05_S4_C3	Tanzania	10	ncbi	Assembly									dfrA8;blaTEM-1B;mph(A);strB;strA;sul2;blaTEM-1B	6
GCA_000627315.1	1-176-05_S4_C1	Tanzania	10	ncbi	Assembly									dfrA8;blaTEM-1B;blaTEM-1B;mph(A);dfrA8;strB;strA;sul2;blaTEM-1B	6
GCA_000627905.1	1-176-05_S1_C2	Tanzania	10	ncbi	Assembly				recombined (not phylogroup D)					tet(A);catA1;sul2;strA;strB;blaTEM-1B;sul1;dfrA7	8
GCA_000627945.1	1-176-05_S1_C3	Tanzania	10	ncbi	Assembly				recombined (not phylogroup D)					strB;sul2;dfrA7;strB;dfrA14;tet(A);sul1;strB;strA;catA1;blaTEM-1B;strB	9
GCA_000687005.1	1-176-05_S4_C2	Tanzania	10	ncbi	Assembly									dfrA8;blaTEM-1B;mph(A);strB;strA;sul2;blaTEM-1B;blaTEM-1B	6
GCA_000687065.1	2-011-08_S3_C3	Tanzania	10	ncbi	Assembly									dfrA8;blaTEM-1B;blaTEM-1B;blaTEM-1B;mph(A)	3
GCA_000700105.1	3-267-03_S3_C1	Tanzania	10	ncbi	Assembly									dfrA8;blaTEM-1B;mph(A);strB;strA;sul2;blaTEM-1B	6
GCA_000700185.1	3-105-05_S3_C1	Tanzania	10	ncbi	Assembly									dfrA7;sul2;tet(A);strA;sul1;strB;blaTEM-1B;catA1	8
GCA_000700205.1	3-105-05_S3_C2	Tanzania	10	ncbi	Assembly									catA1;sul2;sul1;strA;dfrA7;strB;tet(A);blaTEM-1B	8
GCA_000700245.1	3-373-03_S3_C3	Tanzania	10	ncbi	Assembly									blaTEM-1B;tet(A);sul2;strA;strB;dfrA14	6
GCA_000700305.1	3-475-03_S4_C1	Tanzania	10	ncbi	Assembly									tet(B)	1
GCA_000700425.1	3-373-03_S3_C2	Tanzania	10	ncbi	Assembly									strB;tet(A);strA;sul2;dfrA14;blaTEM-1B	6
GCA_000700465.1	3-373-03_S4_C2	Tanzania	10	ncbi	Assembly									tet(B);strB;strA;dfrA8;sul2;blaTEM-1B	6
GCA_000700505.1	2-011-08_S3_C1	Tanzania	10	ncbi	Assembly									dfrA8;blaTEM-1B;sul2;blaTEM-1B;strA;strB;mph(A);blaTEM-1B;dfrA8	6
GCA_000700665.1	3-373-03_S4_C1	Tanzania	10	ncbi	Assembly									tet(B);blaTEM-1B;sul2;strA;strB;dfrA8	6
GCA_000700705.1	4-203-08_S1_C1	Tanzania	10	ncbi	Assembly				recombined (not phylogroup D)					blaTEM-1B;dfrA8;strB;strA;sul2	5
GCA_000703445.1	2-052-05_S4_C3	Tanzania	10	ncbi	Assembly				recombined (not phylogroup D)					tet(A);blaTEM-1B	2
GCA_000704145.1	2-222-05_S3_C3	Tanzania	10	ncbi	Assembly									strA;tet(A);sul2;strB;dfrA7;sul1;blaTEM-1B	7
GCA_000704325.1	2-316-03_S4_C2	Tanzania	10	ncbi	Assembly				recombined (not phylogroup D)					sul2;strA;strB;blaTEM-1B;mph(A);dfrA8	6
GCA_000704865.1	3-073-06_S1_C2	Tanzania	10	ncbi	Assembly									strB;strA;sul2;tet(A)	4
GCA_000713235.1	7-233-03_S3_C1	Tanzania	10	ncbi	Assembly									mph(A)	1
GCA_000713355.1	7-233-03_S3_C3	Tanzania	10	ncbi	Assembly									mph(A)	1
GCA_000713525.1	7-233-03_S4_C1	Tanzania	10	ncbi	Assembly				recombined (not phylogroup D)						0
GCA_000713535.1	7-233-03_S4_C3	Tanzania	10	ncbi	Assembly				recombined (not phylogroup D)						0
GCA_000713695.1	2-222-05_S3_C1	Tanzania	10	ncbi	Assembly									tet(A);blaTEM-1B;sul2;strA;strB;dfrA7;sul1	7
GCA_000713735.1	2-222-05_S3_C2	Tanzania	10	ncbi	Assembly									blaTEM-1B;tet(A);dfrA7;sul2;strA;strB;sul1	7
GCA_000713945.1	4-203-08_S1_C2	Tanzania	10	ncbi	Assembly				recombined (not phylogroup D)					sul2;blaTEM-1B;strA;strB;dfrA8;tet(B)	6
GCA_000713975.1	4-203-08_S1_C3	Tanzania	10	ncbi	Assembly				recombined (not phylogroup D)					tet(B);strB;strA;blaTEM-1B;sul2;strB;dfrA8	6
GCA_000714065.1	3-373-03_S4_C3	Tanzania	10	ncbi	Assembly									blaTEM-1B;tet(B);dfrA8;strA;strB;sul2	6
GCA_000714105.1	5-172-05_S4_C2	Tanzania	10	ncbi	Assembly									tet(B);blaOXA-1;aadA1;catA1	4
GCA_000714145.1	5-172-05_S4_C1	Tanzania	10	ncbi	Assembly									blaOXA-1;aadA1;tet(B);catA1	4
GCA_000714225.1	5-172-05_S4_C3	Tanzania	10	ncbi	Assembly									blaOXA-1;aadA1;tet(B);catA1	4
GCA_000723325.1	D6-117.29		10	ncbi	Assembly				deletion					sul2;tet(B);strB;strA	4
GCA_000725305.1	KLY		10	ncbi	Assembly									catA1	1
GCA_000731455.1	D6-117_07.11		10	ncbi	Assembly				recombined (not phylogroup D)						0
GCA_000750555.1	K-12 substr. BW25113	USA: Indiana	10	ncbi	Assembly								Redundant		0
GCA_000751315.1			10	ncbi	Assembly				deletion				Redundant		0
GCA_000752175.1	E. coli	Norway	10	ncbi	Assembly										0
GCA_000754855.1	77300132	Denmark	10	ncbi	Assembly									tet(B)	1
GCA_000766965.1	NCTC 50110		10	ncbi	Assembly						S83S/D87G		Redundant	sul1;tet(B);aadA1;blaOXA-1;catA1	5
GCA_000768405.1	G1/2	Germany: near Wetzlar	10	ncbi	Assembly										0
GCA_000768415.1	G4/9	Germany: near Wetzlar	10	ncbi	Assembly				recombined (not phylogroup D)	frameshift					0
GCA_000768465.1	G6/7	Germany: near Wetzlar	10	ncbi	Assembly										0
GCA_000768485.1	G5	Germany: near Wetzlar	10	ncbi	Assembly				recombined (not phylogroup D)						0
GCA_000768505.1	G8	Germany: near Wetzlar	10	ncbi	Assembly										0
GCA_000776355.1	upec-83	USA: WA	10	ncbi	Assembly										0
GCA_000777535.1	upec-282	USA: WA	10	ncbi	Assembly										0
GCA_000779005.1	blood-10-1009	USA: Pacific Northwest	10	ncbi	Assembly						S83L/D87N	S80I/E84		blaTEM-1B;mph(A);tet(A);erm(B);aac(3)-IId;dfrA17;aadA5;sul1	8
GCA_000779155.1	blood-90187	USA: Pacific Northwest	10	ncbi	Assembly					frameshift	S83L/D87N	S80I/E84		sul2;dfrA14;strA;strB;blaTEM-1B;tet(A);blaCMY-2	7
GCA_000779955.1	upec-173	USA: WA	10	ncbi	Assembly										0
GCA_000780965.1	upec-127	USA: WA	10	ncbi	Assembly										0
GCA_000781915.1	blood-09-1290	USA: Pacific Northwest	10	ncbi	Assembly						S83L/D87N	S80I/E84		tet(A);strA;dfrA17;sul2;blaCMY-2;aadA5;sul2;tet(M);blaCMY-2;blaCMY-2;strB;sul2;sul2;sul1;floR;aph(3')-Ia	11
GCA_000782275.1	blood-09-0249	USA: WA	10	ncbi	Assembly					frameshift	S83L/D87N	S80I/E84	Redundant	dfrA14;sul2;tet(A);blaTEM-1B;strB;blaCMY-2;strA	7
GCA_000785765.1	UMNturkey4	USA	10	ncbi	Assembly								Redundant	strB;sul1;blaTEM-1B;sul2;aph(3')-Ic;blaCMY-2;floR;tet(A);aac(3)-VIa;strA	10
GCA_000785865.1	UMNturkey3	USA	10	ncbi	Assembly									sul1;tet(A);blaCMY-2;strA;floR;aac(3)-VIa;strB;sul2	8
GCA_000797595.1	CVM N36225PS	USA	10	ncbi	Assembly									aph(3')-Ia;tet(A);floR;dfrA17;aadA5;sul1	6
GCA_000797795.1	CVM N34562PS	USA	10	ncbi	Assembly									tet(B);sul2;aph(3')-Ic;strB;strA;floR	6
GCA_000798135.1	CVM N34054PS	USA	10	ncbi	Assembly						S83L/D87			sul1;aadA1;blaOXA-1;tet(B);catA1	5
GCA_000798255.1	CVM N36093PS	USA	10	ncbi	Assembly									sul2;strA;strB;floR;tet(A);dfrA1;aadA1	7
GCA_000798575.1	CVM N36404PS	USA	10	ncbi	Assembly									blaCMY-2	1
GCA_000800215.1	ER2796	n/a	10	ncbi	Assembly									tet(B);aph(3')-Ia	2
GCA_000800765.1	ER3413	n/a	10	ncbi	Assembly								Redundant	tet(B);aph(3')-Ia	2
GCA_000801205.1	K-12 substr. MG1655	USA: Menlo Park	10	ncbi	Assembly								Redundant		0
GCA_000814145.2	6409	Colombia	10	ncbi	Assembly	blaNDM-1					S83L/D87N	S80I/E84		dfrA7;sul1;sul1;dfrA1;blaTEM-1B;catA1;strA;strB;blaNDM-1;blaNDM-1;sul2;blaNDM-1;catA1;tet(B);tet(B)	10
GCA_000818985.1	CVM N33857PS	USA	10	ncbi	Assembly				recombined (not phylogroup D)		S83L/D87N	S80R/E84E		tet(A);dfrA12;aadA2;cmlA1;aadA1;sul3	6
GCA_000819105.1	CVM N33720PS	USA	10	ncbi	Assembly									blaTEM-1B;tet(B);tet(D);sul1;strB;strA;aadA2;dfrA12	8
GCA_000819125.1	CVM N34564PS	USA	10	ncbi	Assembly								Redundant	sul2;tet(B);aph(3')-Ic;strB;strA;floR	6
GCA_000819305.1	CVM N36099PS	USA	10	ncbi	Assembly									tet(A);sul1;sul2;blaTEM-1B;mph(A);strA;strB;aac(3)-VIa;aadA1	9
GCA_000819325.1	CVM N38381PS	USA	10	ncbi	Assembly									tet(A);floR;strB;strA;sul2;tet(M)	6
GCA_000826905.1	rEc.y.dC.46	not applicable	10	ncbi	Assembly								Redundant	aadA1;blaTEM-116	2
GCA_000826925.1	rEc.b.dC.12	not applicable	10	ncbi	Assembly									aadA1;blaTEM-116	2
GCA_000829985.1	1303	Germany: Hannover	10	ncbi	Assembly				recombined (not phylogroup D)					tet(B);strA;strB;sul2	4
GCA_000833635.2	USML2	Malaysia	10	ncbi	Assembly						S83/D87N				0
GCA_000942915.1	FHI29	Norway	10	ncbi	Assembly									blaTEM-1B;blaTEM-1B;sul1;aadA12;tet(B)	4
GCA_000948005.1	381-3	Netherlands: Groningen	10	ncbi	Assembly		blaCTX-M-15							blaCTX-M-15;blaTEM-1B	2
GCA_000951895.1	FHI30	Norway	10	ncbi	Assembly										0
GCA_000951935.1	FHI99	Norway	10	ncbi	Assembly										0
GCA_000952955.1	K-12 substr. RV308		10	ncbi	Assembly										0
GCA_000954045.1	MPEC4839	Israel	10	ncbi	Assembly				recombined (not phylogroup D)						0
GCA_000968515.1	VR50	missing	10	ncbi	Assembly									sul2;blaTEM-1B;strA;strB	4
GCA_000981485.1	K-12 substr. AG100		10	ncbi	Assembly								Redundant		0
GCA_000988355.1	SQ37	USA	10	ncbi	Assembly								Redundant		0
GCA_000988385.1	SQ88	USA	10	ncbi	Assembly								Redundant		0
GCA_000988425.1	SQ110	USA	10	ncbi	Assembly								Redundant		0
GCA_000988445.1	SQ171	USA	10	ncbi	Assembly								Redundant		0
GCA_000988465.1	SQ2203	USA	10	ncbi	Assembly								Redundant		0
GCA_001010165.1	BM	Russia	10	ncbi	Assembly									aadA1;dfrA1;sul2;strA;strB	5
GCA_001012025.1	CFSAN026796	USA	10	ncbi	Assembly									tet(C);floR;sul2;strA;strB;tet(A);blaOXA-2;aadA1	8
GCA_001020945.2	K-12 substr. GM4792		10	ncbi	Assembly								Redundant		0
GCA_001021005.2	K-12 substr. GM4792		10	ncbi	Assembly								Redundant		0
GCA_001030405.1	MGH108	missing	10	ncbi	Assembly				recombined (not phylogroup D)						0
GCA_001030635.1	BIDMC112	missing	10	ncbi	Assembly									sul2	1
GCA_001043215.1	NCM3722	USA: California	10	ncbi	Assembly										0
GCA_001188105.2	FDAARGOS_56	USA:CA	10	ncbi	Assembly										0
GCA_001264215.1	IH57218	Finland: Kivijaervi	10	ncbi	Assembly				recombined (not phylogroup D)						0
GCA_001268405.1	swine fecal		10	ncbi	Assembly				recombined (not phylogroup D)					tet(B);blaTEM-1B;aph(4)-Ia;aac(3)-IVa;aph(3')-Ia;aadA12;sul1	7
GCA_001268465.1	YS river water		10	ncbi	Assembly				recombined (not phylogroup D)						0
GCA_001268765.1	YS river water		10	ncbi	Assembly									mph(A);sul2;strA;strB;catA1;dfrA12;aadA2;blaTEM-1B;sul1	9
GCA_001268825.1	YS river water		10	ncbi	Assembly				recombined (not phylogroup D)						0
GCA_001268845.1	YS river water		10	ncbi	Assembly									tet(B)	1
GCA_001268985.1	chicken fecal		10	ncbi	Assembly								Redundant		0
GCA_001269105.1	chicken fecal		10	ncbi	Assembly						S83L/D87			blaTEM-1B;tet(A);strB;strA;sul2	5
GCA_001269265.1	cow fecal		10	ncbi	Assembly										0
GCA_001276585.2	RR1	NA	10	ncbi	Assembly								Redundant		0
GCA_001277415.1	602370_aEPEC	Bangladesh	10	ncbi	Assembly								Redundant	dfrA8;strB;strA;sul2;blaTEM-1B;tet(A)	6
GCA_001277735.1	202973_aEPEC	Mali	10	ncbi	Assembly									dfrA8;tet(A);strB;strA;sul2;blaTEM-1B	6
GCA_001277755.1	401174_aEPEC	Kenya	10	ncbi	Assembly									sul2;tet(A);strA;strB;dfrA1;aadA1;blaTEM-1B;sul1	8
GCA_001283165.1	200781_aEPEC	Mali	10	ncbi	Assembly									tet(A)	1
GCA_001283665.1	102010_aEPEC	Gambia	10	ncbi	Assembly									strA;dfrA8;sul2;blaTEM-1B;strB;tet(A)	6
GCA_001284305.1	700337	Pakistan	10	ncbi	Assembly									strA;blaTEM-1B;strB;dfrA14;tet(A);sul2	6
GCA_001284445.1	102014_aEPEC	Gambia	10	ncbi	Assembly									sul2;dfrA14;strB	3
GCA_001284905.1	401082	Kenya	10	ncbi	Assembly										0
GCA_001285265.1	400714_aEPEC	Kenya	10	ncbi	Assembly									tet(A);sul2;dfrA5;blaTEM-1B;strA;strB	6
GCA_001285345.1	200439_aEPEC	Mali	10	ncbi	Assembly									sul2;blaTEM-1B;strA;strB;dfrA8;tet(A)	6
GCA_001291365.1	KRX	52.02 DD8.52 DDGermany	10	ncbi	Assembly						S83/D87N		Redundant		0
GCA_001306715.1	UCD-JA37	USA: Sacramento, CA	10	ncbi	Assembly						S83L/D87N	S80I/E84		tet(B);aadA1;dfrA1;blaTEM-1B;sul2	5
GCA_001308065.1	K-12 substr. MG1655	India	10	ncbi	Assembly								Redundant		0
GCA_001308125.1	K-12 substr. MG1655_TMP32XR1	India:Bangalore	10	ncbi	Assembly								Redundant		0
GCA_001308165.1	K-12 substr. MG1655_TMP32XR2	India:Bangalore	10	ncbi	Assembly								Redundant		0
GCA_001309735.1	09-0525	Canada: Alberta	10	ncbi	Assembly										0
GCA_001405275.1	MC1061		10	ncbi	Assembly									catA1	1
GCA_001441325.1	VL2732	Israel	10	ncbi	Assembly										0
GCA_001441335.1	VL2874	Israel	10	ncbi	Assembly									tet(C)	1
GCA_001484455.1	AZ79	China:Heilongjiang	10	ncbi	Assembly				recombined (not phylogroup D)						0
GCA_001544635.1	K-12 substr. MG1655	USA: Palo Alto	10	ncbi	Assembly								Redundant		0
GCA_001559655.1	DHB4	USA	10	ncbi	Assembly								Redundant		0
GCA_001559675.1	C3026	USA	10	ncbi	Assembly									aadA1;aadA1;aadA1	1
GCA_001566335.1	JW5437-1 substr. MG1655	not collected	10	ncbi	Assembly								Redundant	aph(3')-IIa	1
GCA_001575275.1	G188	United Kingdom: Scotland	10	ncbi	Assembly										0
GCA_001575295.1	G196	United Kingdom: Scotland	10	ncbi	Assembly										0
GCA_001575305.1	G19	Belgium	10	ncbi	Assembly									sul3;blaTEM-1B;aadA1;dfrA1	4
GCA_001575355.1	G190	United Kingdom: Scotland	10	ncbi	Assembly										0
GCA_001575385.1	G200	United Kingdom: Scotland	10	ncbi	Assembly				recombined (not phylogroup D)						0
GCA_001575435.1	G220	Israel	10	ncbi	Assembly				recombined (not phylogroup D)						0
GCA_001575455.1	G211	Israel	10	ncbi	Assembly				recombined (not phylogroup D)				Redundant		0
GCA_001575465.1	G222	Israel	10	ncbi	Assembly								Redundant		0
GCA_001575475.1	G214	Israel	10	ncbi	Assembly						S83L/D87			tet(A);strB;dfrA14;strA;sul2;blaTEM-1B	6
GCA_001575545.1	G213	Israel	10	ncbi	Assembly					frameshift	S83L/D87N	S80I/E84		strA;tet(B);dfrA14;sul2;mph(A);sul1;blaTEM-1B;catA1;aadA1;aadB;strB;floR	12
GCA_001575555.1	G229	Finland	10	ncbi	Assembly									sul2;strA;blaTEM-1C;strB	4
GCA_001575595.1	G233	Finland	10	ncbi	Assembly										0
GCA_001575625.1	G236	Finland	10	ncbi	Assembly										0
GCA_001575675.1	G237	Finland	10	ncbi	Assembly				recombined (not phylogroup D)						0
GCA_001575755.1	G111	France	10	ncbi	Assembly										0
GCA_001575775.1	G114	France	10	ncbi	Assembly				recombined (not phylogroup D)						0
GCA_001575785.1	G15	Belgium	10	ncbi	Assembly				recombined (not phylogroup D)						0
GCA_001575855.1	G16	Belgium	10	ncbi	Assembly				recombined (not phylogroup D)				Redundant	strB;strA	2
GCA_001575885.1	G169	France	10	ncbi	Assembly										0
GCA_001575915.1	G17	Belgium	10	ncbi	Assembly				recombined (not phylogroup D)					strA;strB	2
GCA_001575945.1	G184	United Kingdom: Scotland	10	ncbi	Assembly				recombined (not phylogroup D)						0
GCA_001575995.1	G246	France	10	ncbi	Assembly		blaCTX-M-14				S83L/D87N	S80I/E84		blaCTX-M-14;aph(3')-Ia;sul2;tet(B);strA;strB;blaTEM-1B;catA1	8
GCA_001576015.1	G310	United Kingdom: Scotland	10	ncbi	Assembly									tet(A);sul2;dfrA1;blaTEM-1B;aadA1;sul1;floR	7
GCA_001576025.1	G250	Israel	10	ncbi	Assembly										0
GCA_001576035.1	G27	Belgium	10	ncbi	Assembly								Redundant		0
GCA_001576105.1	G314	United Kingdom: Scotland	10	ncbi	Assembly										0
GCA_001576135.1	G313	United Kingdom: Scotland	10	ncbi	Assembly										0
GCA_001576155.1	G39	Belgium	10	ncbi	Assembly				recombined (not phylogroup D)						0
GCA_001576205.1	G301	United Kingdom: Scotland	10	ncbi	Assembly										0
GCA_001576235.1	G300	United Kingdom: Scotland	10	ncbi	Assembly										0
GCA_001576305.1	G207	Israel	10	ncbi	Assembly				recombined (not phylogroup D)				Redundant		0
GCA_001576325.1	G28	Belgium	10	ncbi	Assembly										0
GCA_001576385.1	G35	Belgium	10	ncbi	Assembly										0
GCA_001576395.1	G6	Belgium	10	ncbi	Assembly				recombined (not phylogroup D)						0
GCA_001576455.1	G51	Germany	10	ncbi	Assembly										0
GCA_001576465.1	G315	United Kingdom: Scotland	10	ncbi	Assembly									strA;tet(A);aph(3')-Ia;blaTEM-1B;strB;sul2;dfrA5;sul1;floR	9
GCA_001576495.1	G43	Germany	10	ncbi	Assembly									tet(C)	1
GCA_001580255.1	DV130	not collected	10	ncbi	Assembly								Redundant	aph(3')-IIa	1
GCA_001582895.1	DV133T	not collected	10	ncbi	Assembly								Redundant		0
GCA_001582905.1	DV159	not collected	10	ncbi	Assembly								Redundant		0
GCA_001607125.1	STEC 2236	Netherlands	10	ncbi	Assembly									strB;strA;sul2;tet(B)	4
GCA_001607685.1	STEC 2708	Netherlands	10	ncbi	Assembly										0
GCA_001607895.1	STEC 2953	Netherlands	10	ncbi	Assembly										0
GCA_001609745.1	STEC 545	Netherlands	10	ncbi	Assembly										0
GCA_001614375.1	cattle1	China:Beijing	10	ncbi	Assembly							unknown		blaTEM-1B;catA1;dfrA17;aac(3)-IId;aadA5;sul1;strA;strB;mph(A);aph(3')-Ia;tet(B);sul2	12
GCA_001614395.1	cattle2	China:Sichuan	10	ncbi	Assembly									blaTEM-1B;strA;strB	3
GCA_001614405.1	cattle6	China:Gansu	10	ncbi	Assembly										0
GCA_001614475.1	cattle9	Japan	10	ncbi	Assembly								Redundant	aph(3')-Ia;aadA13;sul1	3
GCA_001614535.1	cattle8	China:Beijing	10	ncbi	Assembly								Redundant	aac(3)-IId;catA1;mph(A);aph(3')-Ic;tet(B);strB;sul1;blaTEM-1B;aadA5;dfrA17	10
GCA_001614635.1	cattle13	China:Xinjiang	10	ncbi	Assembly						S83L/D87N	S80I/E84		strA;strB;dfrA1;aac(3)-IId;aadA1;erm(B);blaTEM-1B;sul1;floR;tet(A);aph(4)-Ia;mph(A);aac(3)-IVa	13
GCA_001614775.1	cattle18	China:Xinjiang	10	ncbi	Assembly						S83L/D87N	S80I/E84		sul2	1
GCA_001614875.1	swine4	China:Beijing	10	ncbi	Assembly									tet(B);sul1;catA1;tet(M);sul2	5
GCA_001615205.1	swine14	China:Beijing	10	ncbi	Assembly									tet(A)	1
GCA_001615395.1	swine20	China:Jiangsu	10	ncbi	Assembly				frameshift		S83L/D87N	S80I/E84		dfrA12;oqxB;aadA2;floR;strB;aac(3)-IId;strA;oqxA;sul2;blaTEM-1A;tet(A)	11
GCA_001615565.1	swine28	China:Jiangsu	10	ncbi	Assembly						S83L/D87N	S80I/E84		aac(6')Ib-cr;mph(A);blaTEM-1B;oqxB;aph(3')-Ia;sul3;strA;rmtB;dfrA12;oqxA;erm(B);floR;cmlA1;aph(4)-Ia;sul1;sul2;aac(3)-IVa;ARR-3;catB3;blaOXA-1;mcr-1.1	21
GCA_001615695.1	swine34	China:jiangsxi	10	ncbi	Assembly				recombined (not phylogroup D)		S83L/D87N	S80I/E84		aadA1;sul2;blaTEM-1B;aac(3)-IId;dfrA1;oqxB;aph(3')-Ia;catA1;strA;oqxA;tet(A);strB;sul1	13
GCA_001616145.1	swine58	China:Guangdong	10	ncbi	Assembly						S83L/D87			oqxB;aph(3')-Ia;tet(B);dfrA12;aadA2;sul1;mph(A);sul2;oqxA;strB;strA	11
GCA_001616175.1	swine57	China:Anhui	10	ncbi	Assembly						S83L/D87			oqxB;aac(3)-IId;tet(A);oqxA;sul1;aadA1;dfrA1	7
GCA_001616375.1	swine68	China:Jiangsu	10	ncbi	Assembly						S83L/D87	S80R/E84E		oqxB;strB;strA;sul2;aph(3')-IIa;oqxA;dfrA1;aadA1;sul1;blaTEM-1B;tet(A)	11
GCA_001637635.1	3234/A	Germany	10	ncbi	Assembly										0
GCA_001637645.1	131/07	Germany	10	ncbi	Assembly								Redundant		0
GCA_001641955.1	3c112	Viet Nam: Hanoi	10	ncbi	Assembly		blaCTX-M-14				S83L/D87			blaCTX-M-14;erm(B);mph(A);dfrA14;tet(A);strB;strA;sul2;blaTEM-1B;aacA4;cmlA1	11
GCA_001660095.1	ED-53	Italy	10	ncbi	Assembly									tet(A);sul1;aadA13	3
GCA_001663075.1	ER1821R	not applicable	10	ncbi	Assembly										0
GCA_001693555.1	E2	Brazil:South	10	ncbi	Assembly									strA;dfrA1;aadA1;sul2;sul1;strB;catA1;blaTEM-1B	8
GCA_001704035.1	LCB4023	USA	10	ncbi	Assembly						S83L/D87		Redundant	aadA1	1
GCA_001704555.1	NCTC86	Germany: Munich	10	ncbi	Assembly										0
GCA_001742465.1	EPEC 536	Netherlands	10	ncbi	Assembly										0
GCA_001742475.1	EPEC 720	Netherlands	10	ncbi	Assembly								Redundant		0
GCA_001742485.1	EPEC 631	Netherlands	10	ncbi	Assembly								Redundant		0
GCA_001742495.1	EPEC 400	Netherlands	10	ncbi	Assembly								Redundant		0
GCA_001742545.1	EPEC 1316	Netherlands	10	ncbi	Assembly									strB;strA;sul2;dfrA8;blaTEM-1B	5
GCA_001742555.1	EPEC 2646	Netherlands	10	ncbi	Assembly										0
GCA_001742565.1	EPEC 2669	Netherlands	10	ncbi	Assembly								Redundant		0
GCA_001742575.1	EPEC 3029	Netherlands	10	ncbi	Assembly								Redundant		0
GCA_001747365.2	ICBEC7P	Brazil: Santos	10	ncbi	Assembly		blaCTX-M-1				S83L/D87		Redundant	tet(B);blaCTX-M-1;sul2;aadA1;tet(A);mcr-1.1;mcr-1.1	6
GCA_001748535.1	VL2871	Israel	10	ncbi	Assembly										0
GCA_001748545.1	VL2790	Israel	10	ncbi	Assembly								Redundant	tet(C)	1
GCA_001748605.1	VL2810	Israel	10	ncbi	Assembly				recombined (not phylogroup D)					sul2;strB;blaTEM-1B;tet(A);strA	5
GCA_001748625.1	VL3009	Israel	10	ncbi	Assembly								Redundant	tet(C)	1
GCA_001748895.1	AF7658-3	Israel	10	ncbi	Assembly				recombined (not phylogroup D)					aadA1;sul1;tet(A)	3
GCA_001749125.1	K34	Israel	10	ncbi	Assembly										0
GCA_001749225.1	K6112	Israel	10	ncbi	Assembly										0
GCA_001749285.1	K6636	Israel	10	ncbi	Assembly									tet(C)	1
GCA_001749295.1	VL49	Israel	10	ncbi	Assembly									dfrA5;tet(A);aph(3')-Ia;sul2;strB;blaTEM-1B;strA	7
GCA_001749385.1	VL123	Israel	10	ncbi	Assembly									tet(C)	1
GCA_001749505.1	VL2619-1	Israel	10	ncbi	Assembly										0
GCA_001749525.1	VL2632	Israel	10	ncbi	Assembly										0
GCA_001749635.1	VL2622	Israel	10	ncbi	Assembly										0
GCA_001878695.1	K-12 substr. ZK126	USA: Los Angeles	10	ncbi	Assembly								Redundant		0
GCA_001881515.1	MN067	India: Delhi	10	ncbi	Assembly		blaCTX-M-15				S83L/D87			tet(B);qepA;dfrA12;aadA2;sul1;mph(A);blaCTX-M-15;blaTEM-1B;catA1;QnrS1;aac(3)-IId	11
GCA_001892795.1	654	China: Shandong	10	ncbi	Assembly	blaNDM-5	blaCTX-M-65				S83L/D87N	S80I/E84	Redundant	aph(3')-Ia;blaCMY-2;tet(A);floR;aadA5;blaCTX-M-65;blaNDM-5;strB;dfrA17;strA;fosA;sul2;sul1;mph(A)	14
GCA_001892825.1	510	China: Shandong	10	ncbi	Assembly	blaNDM-5	blaCTX-M-65				S83L/D87N	S80I/E84	Redundant	aph(3')-Ia;blaCTX-M-65;blaNDM-5;sul2;fosA;strA;strB;tet(A);floR;blaCMY-2;dfrA17;aadA5;sul1;mph(A)	14
GCA_001893285.1	644	China: Shandong	10	ncbi	Assembly	blaNDM-5			recombined (not phylogroup D)		S83L/D87	S80I/E84		QnrS1;oqxB;tet(A);blaNDM-5;aph(3')-Ia;strB;oqxA;strA;sul3;mef(B);sul2;blaCMY-2;floR;aadA1;cmlA1;aadA2;dfrA12	17
GCA_001893345.1	683	China: Shandong	10	ncbi	Assembly	blaNDM-5	blaCTX-M-65				S83L/D87N	S80I/E84		aph(3')-Ia;floR;fosA;blaCTX-M-65;tet(A);blaNDM-5;mph(A);strB;dfrA17;strA;aadA5;sul2;sul1;blaCMY-2	14
GCA_001893615.1	709	China: Shandong	10	ncbi	Assembly	blaNDM-9	blaCTX-M-65				S83L/D87G	S80I/E84		aph(4)-Ia;tet(A);dfrA12;sul1;aac(3)-IVa;blaCTX-M-65;dfrA1;aph(3')-Ia;strB;mph(A);strA;sul2;blaNDM-9;fosA;floR;blaTEM-1B;aadA2	17
GCA_001893785.1	515	China: Shandong	10	ncbi	Assembly	blaNDM-5			recombined (not phylogroup D)		S83L/D87	S80I/E84	Redundant	tet(A);aph(3')-Ia;strA;oqxB;sul2;blaCMY-2;strB;sul3;QnrS1;oqxA;mef(B);aadA1;blaNDM-5;floR;cmlA1;aadA2;dfrA12	17
GCA_001893865.1	Ec-03	China: Zhengzhou	10	ncbi	Assembly	blaNDM-1				deletion				blaSHV-12;catA1;blaNDM-1;aadD;mph(A)	5
GCA_001894165.1	728	China: Shandong	10	ncbi	Assembly						S83L/D87			aph(3')-Ia;tet(B);sul2;catA1;dfrA12;aadA2;cmlA1;aadA1;sul3;mef(B);mcr-1.1	11
GCA_001894225.1	719	China: Shandong	10	ncbi	Assembly		blaCTX-M-55				S83L/D87G	S80I/E84	Redundant	aph(3')-IIa;oqxB;fosA;aph(3')-Ic;cml;blaTEM-1B;sul2;oqxA;strA;strB;blaCTX-M-55;aadA3;tet(A);floR	14
GCA_001894385.1	659	China: Shandong	10	ncbi	Assembly	blaNDM-5	blaCTX-M-14							aph(4)-Ia;aph(3')-Ia;floR;tet(A);aadA2;fosA;catB3;blaNDM-5;aac(6')Ib-cr;ARR-3;blaCTX-M-14;cmlA1;tet(M);aadA1;sul3;sul2;aac(3)-IVa;QnrS2;blaOXA-1;mcr-1.1	20
GCA_001894505.1	641	China: Shandong	10	ncbi	Assembly	blaNDM-5	blaCTX-M-65				S83L/D87N	S80I/E84	Redundant	aph(3')-Ia;blaCTX-M-65;sul2;fosA;strA;blaNDM-5;strB;tet(A);floR;blaCMY-2;dfrA17;aadA5;sul1;mph(A)	14
GCA_001894685.1	722	China: Shandong	10	ncbi	Assembly		blaCTX-M-55				S83L/D87G	S80I/E84		oqxB;blaTEM-1B;aph(3')-IIa;fosA;sul2;oqxA;blaCTX-M-55;strA;strB;tet(A);floR	11
GCA_001900455.1	H7	missing	10	ncbi	Assembly				recombined (not phylogroup D)						0
GCA_001900655.1	D4	missing	10	ncbi	Assembly									floR;aph(3')-Ic;QnrS2;sul3;aadA1;cmlA1;aadA2;dfrA12;tet(B);tet(B);blaTEM-1B	10
GCA_001900715.1	D9	missing	10	ncbi	Assembly								Redundant	floR;sul3;aadA1;aph(3')-Ic;cmlA1;aadA2;dfrA12;QnrS2;tet(B);blaTEM-1B	10
GCA_001911595.1	200144	Mali: Bamako	10	ncbi	Assembly				recombined (not phylogroup D)					aadA1;tet(A);dfrA1;blaTEM-1B;sul2	5
GCA_001912105.1	401900	Kenya: Nyanza Province	10	ncbi	Assembly									dfrA8;strB;strA;sul2;tet(B);blaTEM-1B	6
GCA_001932515.1	tolC-	Germany: Helmholtz-Centre for Infection Research	10	ncbi	Assembly					frameshift					0
GCA_001940485.1	204965	Austria: Upper Austria, Linz	10	ncbi	Assembly						S83L/D87N	S80I/E84		strA;tet(A);aadA2;strB;sul3;cmlA1;sul2;aac(3)-IIa;blaTEM-154;sul1;dfrA1;mcr-1.1	12
GCA_001982555.1	ICBEC13AM	Brazil: Santos	10	ncbi	Assembly		blaCTX-M-1				S83L/D87			sul2;tet(B);aadA1;tet(A);blaCTX-M-1;mcr-1.1	6
GCA_001990855.1	TS25/08	Germany: Stuttgart	10	ncbi	Assembly									dfrA1;catA1;tet(B);strA;sul3;strB;blaTEM-1B	7
GCA_001990925.1	LM27564	Germany: Munich	10	ncbi	Assembly										0
GCA_001999185.1	MGY	Israel	10	ncbi	Assembly								Redundant	catA1	1
GCA_002001635.1	1.4-R4	Australia: Sydney	10	ncbi	Assembly									dfrA7;sul1;tet(A)	3
GCA_002001765.1	2.2-R2	Australia: Sydney	10	ncbi	Assembly						S83L/D87			tet(A)	1
GCA_002001885.1	24-R3	Australia: Sydney	10	ncbi	Assembly									sul2;dfrA5;strA;strB	4
GCA_002001905.1	1-R1	Australia: Sydney	10	ncbi	Assembly									dfrA7;sul2;sul1;tet(A);blaTEM-1B;strB;strA	7
GCA_002002005.1	1.2-R3	Australia: Sydney	10	ncbi	Assembly									dfrA14;sul2;tet(A);strB	4
GCA_002002075.1	15.1-R1	Australia: Sydney	10	ncbi	Assembly									sul2;dfrA5;strA;strB	4
GCA_002002285.1	21.1-R1	Australia: Sydney	10	ncbi	Assembly									blaTEM-1B;strA;sul2;strB;tet(A)	5
GCA_002007165.1	LS5218	Missing	10	ncbi	Assembly								Redundant		0
GCA_002007705.1	NCTC86	Germany	10	ncbi	Assembly										0
GCA_002012185.1	Ecol_422	Ecuador: Quito	10	ncbi	Assembly	blaKPC-2	blaCTX-M-2				S83L/D87N	S80I/E84		aac(6')Ib-cr;aac(6')Ib-cr;blaOXA-1;catB3;ARR-3;sul1;blaOXA-1;blaCTX-M-2;sul1;catB3;mph(A);ARR-3;blaTEM-1B;aac(3)-IIa;sul1;blaKPC-2;erm(B);mph(A);sul1;aadA5;dfrA17;aac(6')Ib-cr;blaOXA-1;catB3;tet(B)	14
GCA_002018425.1	ICBECAM7	Brazil: Sao Paulo	10	ncbi	Assembly		blaCTX-M-8		recombined (not phylogroup D)					blaCTX-M-8;QnrB19	2
GCA_002087785.1	OS_09_001_-1.0	USA: MO	10	ncbi	Assembly		blaCTX-M-15		recombined (not phylogroup D)		S83L/D87			blaCTX-M-15;blaTEM-1B;catA1;dfrA7;tet(B);blaTEM-1B;sul2;strA;strB	8
GCA_002087945.1	ATCC 29425	not applicable	10	ncbi	Assembly										0
GCA_002087985.1	ATCC 10798	not applicable	10	ncbi	Assembly								Redundant		0
GCA_002109745.1	E1002	missing	10	ncbi	Assembly										0
GCA_002109805.1	H617	missing	10	ncbi	Assembly										0
GCA_002109815.1	B175	missing	10	ncbi	Assembly										0
GCA_002110025.1	TA144	missing	10	ncbi	Assembly				recombined (not phylogroup D)						0
GCA_002110225.1	H383	missing	10	ncbi	Assembly									strA;sul2;blaTEM-1B;tet(A);dfrA5	5
GCA_002110275.1	H454	missing	10	ncbi	Assembly										0
GCA_002110545.1	H386	missing	10	ncbi	Assembly									dfrA1;blaTEM-1B	2
GCA_002114355.1	ICBEcBL-I-09(2)	Brazil: Amazon	10	ncbi	Assembly		blaCTX-M-14							tet(B);erm(B);sul1;blaTEM-1B;blaCTX-M-14;aadA2;cmlA1;dfrA15	8
GCA_002118095.1	HST04	China	10	ncbi	Assembly										0
GCA_002133365.1	CH613_eco	China: Guangzhou	10	ncbi	Assembly	blaNDM-5					S83L/D87N	S80I/E84		blaNDM-5;sul1;floR;blaNDM-5;sul2;aph(4)-Ia;aac(3)-IVa;aac(6')Ib-cr;blaOXA-1;catB3;ARR-3;sul1;rmtB;blaTEM-1B;aac(3)-IId;QnrS1;aph(3')-Ia;dfrA12;aadA2;sul1;sul1;sul1;aadA2;dfrA12;mph(A);sul2;strA;strB;tet(A);floR;blaTEM-1B;aadA1;sul1;aac(3)-IId;aadA2;strA;strB;blaTEM-1B;QnrS1;mcr-1.1	23
GCA_002133445.1	OLC997	Canada	10	ncbi	Assembly								Redundant		0
GCA_002133595.1	OLC1075	Canada	10	ncbi	Assembly								Redundant		0
GCA_002133765.1	OLC1259	Canada	10	ncbi	Assembly									dfrA7;tet(A);sul2;strA;sul1;strB;blaTEM-1B	7
GCA_002154095.1	WCHEC050609	China: Sichuan, Chengdu	10	ncbi	Assembly		blaCTX-M-55				S83L/D87N	S80I/E84		mef(B);floR;aph(4)-Ia;oqxB;blaCTX-M-55;dfrA12;aph(3')-Ia;aac(3)-IVa;tet(A);aadA2;oqxA;fosA;cmlA1;aadA1;blaCMY-2;sul3;mcr-1.1	17
GCA_002173205.1	2013-6-210A	USA:Midwest	10	ncbi	Assembly										0
GCA_002190105.1	ECOR01	USA: Iowa	10	ncbi	Assembly										0
GCA_002190155.1	ECOR03	USA: Massachusetts	10	ncbi	Assembly									sul1;tet(A);aadA1	3
GCA_002190205.1	ECOR05	USA: Iowa	10	ncbi	Assembly										0
GCA_002190245.1	ECOR07	USA: Washington	10	ncbi	Assembly				recombined (not phylogroup D)					tet(B)	1
GCA_002190275.1	ECOR08	USA: Iowa	10	ncbi	Assembly										0
GCA_002190285.1	ECOR09	Sweden	10	ncbi	Assembly					frameshift					0
GCA_002190305.1	ECOR11	Sweden	10	ncbi	Assembly										0
GCA_002190355.1	ECOR12	Sweden	10	ncbi	Assembly										0
GCA_002190375.1	ECOR14	Sweden	10	ncbi	Assembly				recombined (not phylogroup D)						0
GCA_002190605.1	ECOR25	USA: NY	10	ncbi	Assembly									sul2;strA;strB	3
GCA_002206945.1	E1594	Argentina	10	ncbi	Assembly									blaTEM-1A	1
GCA_002216915.1	CoR-2	China: Zhejiang	10	ncbi	Assembly		blaCTX-M-55				S83L/D87N	S80I/E84		aadA2;tet(A);dfrA12;oqxB;sul3;fosA;dfrA1;cmlA1;aph(3')-Ia;sul1;oqxA;tet(M);blaCTX-M-55;floR;mcr-1.1	15
GCA_002217115.1	CoR-40	China: Zhejiang	10	ncbi	Assembly		blaCTX-M-65				S83L/D87N	S80I/E84		floR;strB;dfrA17;oqxB;aac(3)-IIa;tet(A);catB3;mph(A);aac(6')Ib-cr;ARR-3;aph(3')-Ia;blaCTX-M-65;oqxA;blaTEM-1B;aadA5;blaOXA-1;strA;mcr-1.1	18
GCA_002223925.1	CoR-30	China: Hangzhou	10	ncbi	Assembly		blaCTX-M-15			frameshift	S83L/D87N	S80I/E84		tet(B);strA;aadA5;aac(3)-IIa;strB;sul1;erm(B);sul2;mph(A);dfrA17;blaCTX-M-15	11
GCA_002225465.1	MOD1-EC5752	USA:SD	10	ncbi	Assembly								Redundant		0
GCA_002225535.1	MOD1-EC5750	USA:SD	10	ncbi	Assembly									tet(B);blaTEM-1B;aph(3')-Ic;strB;strA;tet(A)	6
GCA_002225635.1	MOD1-EC5747	USA:SD	10	ncbi	Assembly									aadA2;sul1;tet(B);blaTEM-1B;strB;strA	6
GCA_002225655.1	MOD1-EC5739	USA:IA	10	ncbi	Assembly										0
GCA_002225685.1	MOD1-EC5738	USA:IA	10	ncbi	Assembly				recombined (not phylogroup D)						0
GCA_002225725.1	MOD1-EC5744	USA:MT	10	ncbi	Assembly									dfrA1;blaTEM-1B;sul2;tet(B);strA;aadA1	6
GCA_002225935.1	MOD1-EC5735	USA:IA	10	ncbi	Assembly										0
GCA_002225945.1	MOD1-EC5706	USA:CO	10	ncbi	Assembly									tet(B)	1
GCA_002226095.1	MOD1-EC5731	USA:PA	10	ncbi	Assembly				recombined (not phylogroup D)						0
GCA_002226155.1	MOD1-EC5718	USA:CO	10	ncbi	Assembly									sul2;tet(C);strA;strB	4
GCA_002226295.1	MOD1-EC5721	USA:CO	10	ncbi	Assembly									strA;strB;tet(B)	3
GCA_002226465.1	MOD1-EC5728	USA:PA	10	ncbi	Assembly										0
GCA_002226505.1	MOD1-EC5700	USA:OK	10	ncbi	Assembly				recombined (not phylogroup D)					strB;tet(B);sul2;blaTEM-1B;strA	5
GCA_002226535.1	MOD1-EC5682	USA:PA	10	ncbi	Assembly								Redundant	aph(6)-Ic;tet(B);blaTEM-1B;sul2;aph(3')-IIa;strB;strA;sul2	7
GCA_002226695.1	MOD1-EC5691	USA:OH	10	ncbi	Assembly										0
GCA_002226785.1	MOD1-EC5683	USA:PA	10	ncbi	Assembly									strB;blaTEM-1B;tet(B);aph(6)-Ic;aph(3')-IIa;strA;sul2	7
GCA_002226895.1	MOD1-EC5684	USA:PA	10	ncbi	Assembly								Redundant	aph(6)-Ic;tet(B);aph(3')-IIa;strA;strB;sul2;blaTEM-1B	7
GCA_002226905.1	MOD1-EC5677	USA:CO	10	ncbi	Assembly										0
GCA_002226935.1	MOD1-EC5676	USA:CO	10	ncbi	Assembly									tet(C)	1
GCA_002227105.1	MOD1-EC5672	USA:CO	10	ncbi	Assembly									strB;tet(B);aph(3')-Ic;strA	4
GCA_002227115.1	MOD1-EC5673	USA:CO	10	ncbi	Assembly										0
GCA_002227365.1	MOD1-EC5660	USA:CO	10	ncbi	Assembly									tet(B)	1
GCA_002227375.1	MOD1-EC5638	USA:CO	10	ncbi	Assembly									tet(B);blaTEM-1B;sul2;strB;strA	5
GCA_002227455.1	MOD1-EC5652	USA:CO	10	ncbi	Assembly									sul2;tet(B);aph(3')-Ic;blaTEM-1B;strB;strA	6
GCA_002227535.1	MOD1-EC5643	USA:CO	10	ncbi	Assembly				recombined (not phylogroup D)					tet(B)	1
GCA_002227565.1	MOD1-EC5651	USA:CO	10	ncbi	Assembly				recombined (not phylogroup D)					sul2;strA;strB;tet(B)	4
GCA_002227655.1	MOD1-EC5647	USA:CO	10	ncbi	Assembly				recombined (not phylogroup D)					strB;blaTEM-1B;tet(B);sul2;strA;aadA1	6
GCA_002227795.1	MOD1-EC5644	USA:CO	10	ncbi	Assembly									strA;blaTEM-1B;strB;tet(B)	4
GCA_002227865.1	MOD1-EC5585	USA:CO	10	ncbi	Assembly				recombined (not phylogroup D)					strB;strA;tet(B);sul2	4
GCA_002228355.1	MOD1-EC5577	USA:CO	10	ncbi	Assembly				recombined (not phylogroup D)					aph(6)-Ic;aph(3')-IIa;tet(B);strB;strA	5
GCA_002228565.1	MOD1-EC5563	USA:CO	10	ncbi	Assembly									blaTEM-1B;sul2;tet(B)	3
GCA_002228585.1	MOD1-EC5562	USA:CO	10	ncbi	Assembly									strB;blaTEM-1B;strA;tet(B);sul2	5
GCA_002229165.1	MOD1-EC5535	USA:CO	10	ncbi	Assembly									strB;tet(B);strA	3
GCA_002229375.1	MOD1-EC5500	India	10	ncbi	Assembly				recombined (not phylogroup D)					strB;tet(B);strA;sul2;blaOXA-1;catA1	6
GCA_002229535.1	MOD1-EC5517	USA:CO	10	ncbi	Assembly				recombined (not phylogroup D)						0
GCA_002229785.1	MOD1-EC5504	USA:PA	10	ncbi	Assembly									blaOXA-2;aadA1;blaOXA-2;tet(B);sul1	4
GCA_002229795.1	MOD1-EC5497	USA:NY	10	ncbi	Assembly										0
GCA_002229955.1	MOD1-EC5469	USA:NY	10	ncbi	Assembly										0
GCA_002230185.1	MOD1-EC5482	USA:NY	10	ncbi	Assembly										0
GCA_002230355.1	MOD1-EC5450	USA:NY	10	ncbi	Assembly										0
GCA_002230465.1	MOD1-EC5467	USA:NY	10	ncbi	Assembly				recombined (not phylogroup D)						0
GCA_002231025.1	MOD1-EC5273	USA:OK	10	ncbi	Assembly									aac(3)-IVa;strB;aph(4)-Ia;aph(3')-Ia;aadA2;cmlA1;aadA1;blaTEM-1B;sul3;tet(B);strA	11
GCA_002231075.1	MOD1-EC5272	USA:OK	10	ncbi	Assembly					frameshift				strB;aac(3)-IVa;aph(4)-Ia;blaTEM-1B;aadA2;strA;cmlA1;aadA1;sul1;tet(B);sul3;aph(3')-Ia;tet(A)	13
GCA_002231655.1	MOD1-EC5199	India	10	ncbi	Assembly									strA;tet(A);strB;catA1;dfrA1;sul2;aadA1;sul1	8
GCA_002231885.1	MOD1-EC5118	USA:NY	10	ncbi	Assembly									strB;strA;sul2	3
GCA_002232535.1	MOD1-EC5091	USA:NY	10	ncbi	Assembly						S83L/D87N	S80I/E84		dfrA17;sul2;aadA5;strA;blaTEM-1B;strB	6
GCA_002232715.1	MOD1-EC5087	USA:IA	10	ncbi	Assembly				recombined (not phylogroup D)					strB;strA;sul2;tet(B);blaTEM-1B	5
GCA_002232935.1	MOD1-EC5052	USA:ND	10	ncbi	Assembly									blaTEM-1B	1
GCA_002233015.1	MOD1-EC5053	USA:ND	10	ncbi	Assembly									blaTEM-1B	1
GCA_002233355.1	MOD1-EC5040	USA:PA	10	ncbi	Assembly									tet(C)	1
GCA_002234555.1	DS1	USA:Boston	10	ncbi	Assembly					frameshift					0
GCA_002270225.1	SZH3951	China:Shenzhen	10	ncbi	Assembly		blaCTX-M-14				S83L/D87N	S80I/E84		aph(4)-Ia;aac(3)-IVa;fosA;blaCTX-M-14;tet(A);dfrA1;oqxB;oqxA;sul1;aph(3')-Ia;sul3;aadA1;cmlA1;aadA2;floR;sul2;mcr-1.1	17
GCA_002283335.1	Tc-S1257	Colombia: Bogota	10	ncbi	Assembly								Redundant	mcr-1.1	1
GCA_002283345.1	Tc-RA372.16	Colombia: Bogota	10	ncbi	Assembly								Redundant	mcr-1.1	1
GCA_002283415.1	Tc-RA229.16	Colombia: Bogota	10	ncbi	Assembly								Redundant	mcr-1.1	1
GCA_002283425.1	Tc-S1454	Colombia: Bogota	10	ncbi	Assembly								Redundant	floR;QnrB19;tet(A);tet(B);blaTEM-1B	5
GCA_002283445.1	Tc-RB634	Colombia: Bogota	10	ncbi	Assembly				frameshift	deletion			Redundant		0
GCA_002283595.1	Tc-RA453.16	Colombia: Bogota	10	ncbi	Assembly								Redundant	tet(A);dfrA12;aadA2;sul1;mph(A);mcr-1.1	6
GCA_002283615.1	Tc-S356	Colombia: Bogota	10	ncbi	Assembly								Redundant	tet(B);mcr-1.1	2
GCA_002283625.1	Tc-RA402.16	Colombia: Bogota	10	ncbi	Assembly								Redundant	aac(6')-Ib;mcr-1.1	2
GCA_002283645.1	Tc-RA346.16	Colombia: Bogota	10	ncbi	Assembly								Redundant	aadA1;mcr-1.1	2
GCA_002283675.1	GMR-RA-402.16	Colombia: Caldas	10	ncbi	Assembly									strA;tet(B);dfrA1;aadA1;sul3;mcr-1.1	6
GCA_002290325.1	NIVEDI C53	India:Meghalaya	10	ncbi	Assembly				recombined (not phylogroup D)						0
GCA_002310735.1	1283	United Kingdom: Scotland, Edinburgh	10	ncbi	Assembly						S83L/D87N	S80I/E84		sul2;dfrA14;blaCMY-2;strB;tet(A)	5
GCA_002319165.1	F498	USA: Minnesota	10	ncbi	Assembly									sul2;aph(6)-Ic;tet(B);aph(3')-IIa;aadA1	5
GCA_002319255.1	ED-53	Italy	10	ncbi	Assembly								Redundant	sul1;tet(A);aadA13	3
GCA_002319385.1	2185	Hungary	10	ncbi	Assembly					frameshift				tet(A)	1
GCA_002324495.1	KCJK4148	USA: FL	10	ncbi	Assembly		blaCTX-M-27		recombined (not phylogroup D)				Redundant	strA;tet(A);sul2;blaCTX-M-27;blaTEM-1A;erm(B);mph(A);strB;floR	9
GCA_002324575.1	KCJK4127	USA: FL	10	ncbi	Assembly		blaCTX-M-27		recombined (not phylogroup D)				Redundant	strA;mph(A);tet(A);sul2;blaCTX-M-27;blaTEM-1A;erm(B);strB;floR	9
GCA_002324595.1	KCJK4137	USA: FL	10	ncbi	Assembly		blaCTX-M-27		recombined (not phylogroup D)					strA;sul2;blaCTX-M-27;blaTEM-1A;erm(B);mph(A);strB;floR;tet(A)	9
GCA_002324605.1	KCJK4139	USA: FL	10	ncbi	Assembly		blaCTX-M-27		recombined (not phylogroup D)				Redundant	strA;sul2;blaTEM-1A;mph(A);blaCTX-M-27;erm(B);strB;floR;tet(A)	9
GCA_002324645.1	KCJK4144	USA: FL	10	ncbi	Assembly		blaCTX-M-27		recombined (not phylogroup D)				Redundant	strA;blaCTX-M-27;sul2;blaTEM-1A;erm(B);mph(A);strB;floR;tet(A)	9
GCA_002324675.1	KCJK4158	USA: FL	10	ncbi	Assembly		blaCTX-M-27		recombined (not phylogroup D)				Redundant	strA;tet(A);sul2;blaCTX-M-27;blaTEM-1A;erm(B);mph(A);strB;floR	9
GCA_002324685.1	KCJK4176	USA: FL	10	ncbi	Assembly		blaCTX-M-27		recombined (not phylogroup D)				Redundant	strA;tet(A);sul2;blaCTX-M-27;blaTEM-1A;erm(B);mph(A);strB;floR	9
GCA_002324695.1	KCJK4181	USA: FL	10	ncbi	Assembly		blaCTX-M-27		recombined (not phylogroup D)				Redundant	strA;sul2;blaTEM-1A;erm(B);mph(A);blaCTX-M-27;strB;floR;tet(A)	9
GCA_002324755.1	KCJK4162	USA: FL	10	ncbi	Assembly		blaCTX-M-27		recombined (not phylogroup D)				Redundant	strA;tet(A);sul2;blaCTX-M-27;blaTEM-1A;erm(B);mph(A);strB;floR	9
GCA_002324765.1	KCJK4166	USA: FL	10	ncbi	Assembly		blaCTX-M-27		recombined (not phylogroup D)				Redundant	strA;tet(A);sul2;blaCTX-M-27;blaTEM-1A;erm(B);mph(A);strB;floR	9
GCA_002324775.1	KCJK4201	USA: FL	10	ncbi	Assembly		blaCTX-M-27		recombined (not phylogroup D)				Redundant	strA;blaCTX-M-27;sul2;blaTEM-1A;erm(B);mph(A);strB;floR;tet(A)	9
GCA_002442335.1	39_Esco_HA-DE	Germany	10	ncbi	Assembly		blaCTX-M-14							blaCTX-M-14	1
GCA_002442405.1	46_Esco_HA-DE	Germany	10	ncbi	Assembly		blaCTX-M-1				S83L/D87N	S80I/E84		dfrA1;aadA1;tet(B);strA;strB;blaCTX-M-1;blaTEM-1B	7
GCA_002456375.1	MOD1-EC908	Mexico	10	ncbi	Assembly				recombined (not phylogroup D)						0
GCA_002456415.1	MOD1-EC720	USA: WA	10	ncbi	Assembly									sul2;blaTEM-1B;strB;strA	4
GCA_002458255.1	MOD1-EC1831	missing	10	ncbi	Assembly									dfrA1;aadA1;blaTEM-116	3
GCA_002459965.1	MOD1-EC1663	Belgium	10	ncbi	Assembly								Redundant		0
GCA_002460235.1	MOD1-EC1638	Italy	10	ncbi	Assembly								Redundant	sul1;tet(A);aadA13	3
GCA_002460735.1	MOD1-EC1637	missing	10	ncbi	Assembly									tet(A);sul1;aadA1;mph(B)	4
GCA_002461775.1	MOD1-EC1223	Canada	10	ncbi	Assembly				recombined (not phylogroup D)						0
GCA_002463285.1	MOD1-EC6206	USA: IL	10	ncbi	Assembly									aph(3')-Ia;sul3;tet(A);aadA1;cmlA1;aadA2	6
GCA_002463645.1	MOD1-EC5923	USA: CA	10	ncbi	Assembly								Redundant	aph(3')-IIa;strA;strB;aph(6)-Ic	4
GCA_002463705.1	MOD1-EC6240	USA: PA	10	ncbi	Assembly				recombined (not phylogroup D)					strA;strB;sul2;blaTEM-1B;tet(B)	5
GCA_002464015.1	MOD1-EC6458	USA: WI	10	ncbi	Assembly				recombined (not phylogroup D)					aph(3')-Ia;blaTEM-1B;strB;strA;tet(B)	5
GCA_002464125.1	MOD1-EC6221	USA: MD	10	ncbi	Assembly								Redundant	tet(B);strB;tet(C);aph(3')-Ic;blaTEM-1B;strA	6
GCA_002464165.1	MOD1-EC6210	Singapore	10	ncbi	Assembly									tet(B);sul1;ere(A);dfrA5;catA1;sul2;strA;strB;blaTEM-1B	9
GCA_002464525.1	MOD1-EC5260	China	10	ncbi	Assembly					frameshift	S83L/D87Y	S80I/E84		tet(A);strA;oqxB;strB;oqxA;blaTEM-1B;dfrA17;sul2	8
GCA_002464535.1	MOD1-EC5259	China	10	ncbi	Assembly						S83L/D87N	S80I/E84		blaTEM-1B;oqxB;dfrA1;oqxA;catA1;tet(A);sul1	7
GCA_002464575.1	MOD1-EC5258	China	10	ncbi	Assembly						S83L/D87N	S80I/E84		blaTEM-1B;dfrA1;oqxB;tet(A);oqxA;sul1;aadA1	7
GCA_002464875.1	MOD1-EC6248	USA: OH	10	ncbi	Assembly										0
GCA_002466885.1	MOD1-EC129	United Kingdom	10	ncbi	Assembly								Redundant	tet(C)	1
GCA_002466925.1	MOD1-EC667	USA: WA	10	ncbi	Assembly										0
GCA_002467195.1	MOD1-EC128	United Kingdom	10	ncbi	Assembly								Redundant	tet(B);aadA13;sul1	3
GCA_002467255.1	MOD1-EC7010	USA: NY	10	ncbi	Assembly										0
GCA_002467335.1	MOD1-EC6827	USA: PA	10	ncbi	Assembly					frameshift				blaTEM-1B;sul2;tet(B);aph(3')-Ic;strB;strA	6
GCA_002467345.1	MOD1-EC6826	USA: WA	10	ncbi	Assembly				recombined (not phylogroup D)					strB;tet(B);sul2;blaTEM-1B;aadA1;strA;tet(M)	7
GCA_002467625.1	MOD1-EC6598	USA: PA	10	ncbi	Assembly									strB;strA;blaTEM-1B;tet(B)	4
GCA_002467735.1	MOD1-EC6573	Canada	10	ncbi	Assembly										0
GCA_002467825.1	MOD1-EC6560	India	10	ncbi	Assembly										0
GCA_002467955.1	MOD1-EC6980	USA: CO	10	ncbi	Assembly								Redundant		0
GCA_002468485.1	MOD1-EC6812	USA: TX	10	ncbi	Assembly										0
GCA_002468765.1	MOD1-EC6603	USA: PA	10	ncbi	Assembly				recombined (not phylogroup D)					strB;sul2;aph(3')-Ic;strA;blaTEM-1B;tet(B)	6
GCA_002468825.1	MOD1-EC6599	USA: PA	10	ncbi	Assembly								Redundant	aac(3)-VIa;aadA1;tet(A);sul1;sul2	5
GCA_002468835.1	MOD1-EC6597	USA: PA	10	ncbi	Assembly									strA;strB;tet(B)	3
GCA_002469095.1	MOD1-EC6577	Canada	10	ncbi	Assembly										0
GCA_002469115.1	MOD1-EC6576	Canada	10	ncbi	Assembly								Redundant		0
GCA_002469205.1	MOD1-EC6566	Canada	10	ncbi	Assembly				recombined (not phylogroup D)						0
GCA_002469285.1	MOD1-EC6587	USA: PA	10	ncbi	Assembly									sul2	1
GCA_002473435.1	MOD1-EC5935	USA:PA	10	ncbi	Assembly									blaTEM-1B;tet(B)	2
GCA_002473455.1	MOD1-EC5833	USA:PA	10	ncbi	Assembly										0
GCA_002474495.1	MOD1-EC5813	USA: PA	10	ncbi	Assembly										0
GCA_002474605.1	MOD1-EC5362	USA: CO	10	ncbi	Assembly				recombined (not phylogroup D)					sul2;blaCMY-2;floR;tet(C);tet(A);blaTEM-1B;strB;strA	8
GCA_002474705.1	MOD1-EC5327	Mexico	10	ncbi	Assembly						S83L/D87			tet(B);oqxB;dfrA14;oqxA;sul2;strB	6
GCA_002475195.1	MOD1-EC5120	USA: NY	10	ncbi	Assembly								Redundant	strA;sul2;strB	3
GCA_002475295.1	MOD1-EC5065	USA: CO	10	ncbi	Assembly									tet(B);strB;blaTEM-1B;strA	4
GCA_002475305.1	MOD1-EC5059	USA: MI	10	ncbi	Assembly									aadA2;tet(A);aph(3')-Ia;sul3;aadA1;cmlA1	6
GCA_002475415.1	MOD1-EC5039	USA: PA	10	ncbi	Assembly									tet(B);sul2;strA;strB	4
GCA_002475445.1	MOD1-EC5038	USA: PA	10	ncbi	Assembly									tet(B)	1
GCA_002475635.1	MOD1-EC5007	China	10	ncbi	Assembly				recombined (not phylogroup D)		S83L/D87N	S80I/E84		dfrA1;blaTEM-1B;oqxB;sul2;tet(A);strA;strB;oqxA;sul1;aadA1	10
GCA_002475665.1	MOD1-EC5015	USA: PA	10	ncbi	Assembly								Redundant	tet(B);strB;strA;sul2	4
GCA_002484485.1	MOD1-EC6675	USA: NC	10	ncbi	Assembly				recombined (not phylogroup D)					sul2;strA;mph(A);tet(D);strB;tet(B);sul1;blaTEM-1B;aadA2;dfrA12	10
GCA_002484685.1	MOD1-EC6663	Saudi Arabia	10	ncbi	Assembly				recombined (not phylogroup D)						0
GCA_002485055.1	MOD1-EC6646	Saudi Arabia	10	ncbi	Assembly									blaTEM-1B	1
GCA_002485085.1	MOD1-EC6638	Saudi Arabia	10	ncbi	Assembly									aadA1;sul2;aph(3')-Ia;sul1;strA;strB;blaTEM-1B;dfrA1;catA1;tet(A)	10
GCA_002485355.1	MOD1-EC6620	Mexico	10	ncbi	Assembly				recombined (not phylogroup D)					sul1;strA;aadA2;sul2;dfrA12;strB	6
GCA_002485525.1	MOD1-EC6595	USA: PA	10	ncbi	Assembly									aac(3)-VIa;aadA1;tet(B);tet(A);sul1;sul2	6
GCA_002485555.1	MOD1-EC6562	India	10	ncbi	Assembly									strB;strA	2
GCA_002485665.1	MOD1-EC6478	India	10	ncbi	Assembly									tet(B);blaTEM-1B;blaTEM-1B;aph(3')-Ia;sul1	4
GCA_002485775.1	MOD1-EC6471	USA: WI	10	ncbi	Assembly				recombined (not phylogroup D)					aph(3')-IIa;aadA1;sul2;tet(B);aph(6)-Ic	5
GCA_002485945.1	MOD1-EC6454	USA: PA	10	ncbi	Assembly				recombined (not phylogroup D)					strB;strA;aadA1;tet(B)	4
GCA_002486185.1	MOD1-EC6311	USA: IA	10	ncbi	Assembly									sul2;sul1;aadA1;tet(A)	4
GCA_002486895.1	MOD1-EC6309	USA: IA	10	ncbi	Assembly				recombined (not phylogroup D)					aph(3')-Ic;sul2;strB;blaTEM-1B;strA;tet(B)	6
GCA_002487185.1	MOD1-EC6247	USA: PA	10	ncbi	Assembly										0
GCA_002510645.1	MOD1-EC6500	USA: PA	10	ncbi	Assembly								Redundant	aph(4)-Ia;aac(3)-IVa;sul2;strA;strB;tet(B)	6
GCA_002510885.1	MOD1-EC6399	USA: IA	10	ncbi	Assembly									sul1;aadA12;tet(B);aph(3')-Ic;blaTEM-1B	5
GCA_002510925.1	MOD1-EC6396	New Zealand	10	ncbi	Assembly										0
GCA_002510965.1	MOD1-EC6388	USA: PA	10	ncbi	Assembly				recombined (not phylogroup D)					tet(A);tet(B);aph(3')-Ic;aadA13;sul1	5
GCA_002511475.1	MOD1-EC6320	USA: IA	10	ncbi	Assembly									tet(B);blaTEM-1B;strB;strA	4
GCA_002512425.1	MOD1-EC6381	Mexico	10	ncbi	Assembly									strA;tet(B);sul2;strB	4
GCA_002513075.1	MOD1-EC6533	USA: MI	10	ncbi	Assembly									sul2;tet(B);strB;strA	4
GCA_002513235.1	MOD1-EC6507	USA: MI	10	ncbi	Assembly				recombined (not phylogroup D)					tet(A)	1
GCA_002513495.1	MOD1-EC6443	Mexico	10	ncbi	Assembly										0
GCA_002513705.1	MOD1-EC6404	USA: PA	10	ncbi	Assembly										0
GCA_002514275.1	MOD1-EC6265	USA: PA	10	ncbi	Assembly									blaTEM-1B;sul2;tet(B)	3
GCA_002514765.1	MOD1-EC3823	USA	10	ncbi	Assembly										0
GCA_002516765.1	MOD1-EC5143	USA: CA	10	ncbi	Assembly								Redundant	tet(A);aph(3')-Ia;sul3;aadA1;cmlA1;aadA2	6
GCA_002516985.1	MOD1-EC5278	USA: MN	10	ncbi	Assembly									tet(A);aph(6)-Ic;aph(3')-Ia;blaTEM-1B;aph(3')-IIa;aadA2;cmlA1;aadA1;strB;sul3;strA;tet(B);aph(4)-Ia;aac(3)-IVa	14
GCA_002517145.1	MOD1-EC5166	USA: CA	10	ncbi	Assembly				recombined (not phylogroup D)						0
GCA_002517365.1	MOD1-EC5336	Mexico	10	ncbi	Assembly						S83L/D87Y	S80I/E84		tet(A);oqxB;blaTEM-1B;sul1;strB;dfrA12;oqxA;strA	8
GCA_002517375.1	MOD1-EC5346	USA: ND	10	ncbi	Assembly									blaTEM-1B;blaTEM-1B	1
GCA_002517465.1	MOD1-EC5606	USA: CO	10	ncbi	Assembly				recombined (not phylogroup D)					aph(3')-IIa;sul2;tet(B);strB;strA;aph(6)-Ic	6
GCA_002517555.1	MOD1-EC5383	USA: CO	10	ncbi	Assembly				recombined (not phylogroup D)						0
GCA_002517885.1	MOD1-EC5830	USA: PA	10	ncbi	Assembly									aph(3')-Ia;strB;strA	3
GCA_002517905.1	MOD1-EC5810	USA: PA	10	ncbi	Assembly									sul2;tet(A)	2
GCA_002518725.1	MOD1-EC6981	USA: CO	10	ncbi	Assembly										0
GCA_002518745.1	MOD1-EC6978	USA: TX	10	ncbi	Assembly									sul2;strA;strB	3
GCA_002518945.1	MOD1-EC6968	Argentina	10	ncbi	Assembly								Redundant		0
GCA_002519025.1	MOD1-EC6966	USA: CA	10	ncbi	Assembly								Redundant	strB;strA;sul2	3
GCA_002520205.1	MOD1-EC6872	USA: PA	10	ncbi	Assembly									dfrA8;strA;catA1;tet(B);strB	5
GCA_002521055.1	MOD1-EC6802	USA: MI	10	ncbi	Assembly										0
GCA_002521065.1	MOD1-EC6795	USA: DC	10	ncbi	Assembly									sul2;sul1;aph(3')-Ic;aac(3)-VIa;strA;blaTEM-1B;tet(B)	7
GCA_002521275.1	MOD1-EC6755	Zambia	10	ncbi	Assembly									dfrA7;tet(A);sul2;strA;strB;sul1;catA1	7
GCA_002521285.1	MOD1-EC6756	Zambia	10	ncbi	Assembly									strB;tet(B);blaTEM-1B;dfrA1;sul2;strA	6
GCA_002521515.1	MOD1-EC6707	USA: WI	10	ncbi	Assembly				recombined (not phylogroup D)						0
GCA_002521755.1	MOD1-EC6791	USA: TX	10	ncbi	Assembly									sul1;aac(3)-VIa;aadA1;sul2;tet(A)	5
GCA_002521955.1	MOD1-EC6770	Zambia	10	ncbi	Assembly									sul2;dfrA7;tet(B);catA1;sul1;blaTEM-1B;strB;strA	8
GCA_002522005.1	MOD1-EC6769	Zambia	10	ncbi	Assembly									sul2;aph(3')-Ia;sul1;strA;strB;dfrA5;catA1;blaSHV-1;blaTEM-1B;tet(D)	10
GCA_002522095.1	MOD1-EC6761	Zambia	10	ncbi	Assembly				recombined (not phylogroup D)					tet(B);blaTEM-1B;catA1	3
GCA_002522255.1	MOD1-EC6748	Zambia	10	ncbi	Assembly									tet(B)	1
GCA_002522865.1	MOD1-EC6685	USA: IA	10	ncbi	Assembly										0
GCA_002522895.1	MOD1-EC6683	USA: IA	10	ncbi	Assembly									strB;tet(B);aph(3')-IIa;strA;sul2;aadA1;blaTEM-1B;aph(6)-Ic	8
GCA_002530715.1	N44807	USA:OR	10	ncbi	Assembly		blaCTX-M-15							tet(B);blaCTX-M-15;strB;strA;blaTEM-1D	5
GCA_002534875.1	MOD1-EC5918	USA:CA	10	ncbi	Assembly										0
GCA_002534955.1	MOD1-EC5911	USA:NV	10	ncbi	Assembly									strA;aph(6)-Ic;aph(3')-IIa;strB	4
GCA_002535035.1	MOD1-EC5784	USA:PA	10	ncbi	Assembly										0
GCA_002535535.1	MOD1-EC6255	USA:IA	10	ncbi	Assembly										0
GCA_002535605.1	MOD1-EC6233	USA:VA	10	ncbi	Assembly								Redundant	strB;tet(C);aph(3')-Ic;strA;tet(B);blaTEM-1B	6
GCA_002535625.1	MOD1-EC6227	USA:PA	10	ncbi	Assembly									strA;blaTEM-1B;aph(3')-IIa;strB;tet(B);sul2	6
GCA_002535715.1	MOD1-EC6216	Singapore	10	ncbi	Assembly										0
GCA_002536695.1	MOD1-EC6219	USA:MD	10	ncbi	Assembly									tet(C);strB;blaTEM-1B;aph(3')-Ic;strA;tet(B);sul2	7
GCA_002536795.1	MOD1-EC6217	Singapore	10	ncbi	Assembly				recombined (not phylogroup D)					strB;blaTEM-1B;strA;tet(A);strB;strA;sul2;lnu(C);sul3;aph(3')-Ia;aadA1;cmlA1;aadA2;dfrA12	12
GCA_002537395.1	MOD1-EC6128	USA:SD	10	ncbi	Assembly									tet(B)	1
GCA_002538945.1	MOD1-EC5965	USA:MO	10	ncbi	Assembly						S83L/D87			tet(B);aadA1;dfrA1;sul2	4
GCA_002541825.1	MOD1-EC6050	Norway	10	ncbi	Assembly				recombined (not phylogroup D)						0
GCA_002545085.1	MOD1-EC6168	USA:SD	10	ncbi	Assembly						S83L/D87			QnrB49;sul1;sul2;aadA2;blaSHV-12;tet(D);strA;aph(3')-Ic;aacA4;dfrA18;ere(A);tet(B);aac(6')-IIc;blaTEM-1B;strB;mcr-9	16
GCA_002545575.1	MOD1-EC5880	USA:MN	10	ncbi	Assembly									strB;aph(3')-IIa;strA;tet(B);aph(6)-Ic	5
GCA_002546095.1	MOD1-EC5846	USA:MT	10	ncbi	Assembly									strA;strB	2
GCA_002546975.1	MOD1-EC6176	USA:NE	10	ncbi	Assembly									aph(4)-Ia;aac(3)-IVa;strA;tet(B);strB;blaTEM-1A	6
GCA_002547665.1	MOD1-EC5879	USA:PA	10	ncbi	Assembly									tet(A);sul2	2
GCA_002547835.1	MOD1-EC5869	USA:VA	10	ncbi	Assembly										0
GCA_002548165.1	MOD1-EC5862	USA:NY	10	ncbi	Assembly									tet(B);sul2	2
GCA_002548375.1	MOD1-EC5855	USA:PA	10	ncbi	Assembly										0
GCA_002549355.1	MOD1-EC5819	USA:FL	10	ncbi	Assembly									tet(B)	1
GCA_002549495.1	MOD1-EC5789	USA:CO	10	ncbi	Assembly									strA;tet(B);aph(3')-IIa;sul2;sul1;strB;aph(6)-Ic	7
GCA_002549565.1	MOD1-EC5781	USA:PA	10	ncbi	Assembly				recombined (not phylogroup D)				Redundant		0
GCA_002573115.1	5_Esco_CA-NL	Netherlands	10	ncbi	Assembly		blaCTX-M-1				S83L/D87N			dfrA17;aadA5;blaCTX-M-1;strA;strB;sul2	6
GCA_002631375.1	28_Esco_HA-NL	Netherlands	10	ncbi	Assembly		blaCTX-M-14							blaCTX-M-14	1
GCA_002631485.1	41_Esco_HA-DE	Germany	10	ncbi	Assembly		blaCTX-M-1				S83L/D87			blaCTX-M-1;strA;tet(A);aadA1;dfrA1;strB;sul2;blaTEM-1B	8
GCA_002631575.1	44_Esco_HA-DE	Germany	10	ncbi	Assembly						S83L/D87N			dfrA17;aph(3')-Ia;sul2;sul1;sul3;strA;strB;aadA1;cmlA1;aadA2;aadA5;mph(A);tet(A)	13
GCA_002776495.1	E-124-4	Italy	10	ncbi	Assembly	blaVIM-1			recombined (not phylogroup D)					aacA4;dfrA14;blaACC-1;blaVIM-1;aph(3')-XV;blaSHV-12;aadA1;catB2;mph(A);sul1;QnrS1;strB;strA;sul2	14
GCA_002843685.1	K-12 substr. MG1655	USA: Boston	10	ncbi	Assembly									blaTEM-116	1
GCA_002849135.1	JEONG-9567	USA: FL	10	ncbi	Assembly		blaCTX-M-32		recombined (not phylogroup D)					blaTEM-1A;blaCTX-M-32;sul2;strA;strB;floR;tet(A)	7
GCA_002872145.1	ECG010	India	10	ncbi	Assembly						S83L/D87				0
GCA_002879975.1	ML35	unknown	10	ncbi	Assembly										0
GCA_002896405.1	GX1-3T	China	10	ncbi	Assembly		blaCTX-M-14						Redundant	aph(4)-Ia;fosA;oqxB;aac(3)-IVa;sul1;aph(3')-Ia;aadA1;blaCTX-M-14;oqxA;sul3;dfrA12;cmlA1;sul2;floR;mcr-1.1	15
GCA_002899495.1	CAR	Spain	10	ncbi	Assembly								Redundant		0
GCA_002899515.1	LIM	Spain	10	ncbi	Assembly								Redundant		0
GCA_002899535.1	CIT	Spain	10	ncbi	Assembly								Redundant		0
GCA_002917295.1	203	Ecuador: Quito	10	ncbi	Assembly					frameshift				dfrA5;sul1;blaTEM-1B;tet(B);strB;strA;sul2	7
GCA_002917535.1	200	Ecuador: Quito	10	ncbi	Assembly						S83L/D87			aadA5;blaTEM-1B;dfrA17;mph(A);strA	5
GCA_002917545.1	44	Ecuador: Quito	10	ncbi	Assembly					deletion				tet(B);strB;strA;sul2;dfrA8;blaTEM-1B	6
GCA_002917695.1	241	Ecuador: Quito	10	ncbi	Assembly					frameshift				strA;QnrB19;tet(A);dfrA5;sul1;strB	6
GCA_002919645.1	ECONIH3	USA	10	ncbi	Assembly	blaKPC-2			recombined (not phylogroup D)		S83A/D87			aph(3')-Ia;mph(A);blaKPC-2;aac(6')Ib-cr;blaOXA-1;catB3;sul1	7
GCA_002933585.1	cont_1	India: Kharagpur	10	ncbi	Assembly						S83/D87N		Redundant		0
GCA_002934025.1	DTU-1	Denmark	10	ncbi	Assembly										0
GCA_002941065.1	YH17192	China: Guangdong	10	ncbi	Assembly		blaCTX-M-14		recombined (not phylogroup D)		S83L/D87N			tet(A);floR;oqxB;fosA;sul1;sul3;sul2;aph(3')-Ia;dfrA12;oqxA;cmlA1;blaCTX-M-14;aac(3)-IVa;mcr-1.1	14
GCA_002941765.1	YH17185	China: Guangdong	10	ncbi	Assembly						S83L/D87N			blaTEM-1B;cmlA1;dfrA1;aph(4)-Ia;tet(A);floR;oqxB;aadA2;sul3;sul1;tet(M);oqxA;ARR-3;sul2;aac(3)-IVa;mcr-1.1;mcr-3.24	17
GCA_002941785.1	YH17180	China: Guangdong	10	ncbi	Assembly		blaCTX-M-65				S83L/D87N			aph(3')-Ia;oqxB;fosA;sul3;sul2;blaCTX-M-65;mph(A);tet(A);tet(M);aac(3)-IId;erm(42);oqxA;qepA;dfrA1;rmtB;sul1;floR;blaTEM-1B;dfrA12;mcr-1.1	20
GCA_002941845.1	YH17169	China: Anhui	10	ncbi	Assembly		blaCTX-M-14;blaCTX-M-55				S83L/D87A			aadA1;sul3;blaCTX-M-14;oqxB;mph(A);aph(3')-IIa;fosA;sul2;tet(A);blaTEM-1B;strA;aph(3')-Ia;sul1;oqxA;floR;aac(3)-IVa;dfrA12;aadA2;strB;blaCTX-M-55;cmlA1;mcr-1.1	22
GCA_002942585.1	NX_F6_1	China: Ningxia	10	ncbi	Assembly		blaCTX-M-14							QnrS1;dfrA14;blaCTX-M-14;sul2;strA;strB;tet(C)	7
GCA_002952855.1	7FA	not applicable	10	ncbi	Assembly								Redundant	blaTEM-1A	1
GCA_002952875.1	6FA	not applicable	10	ncbi	Assembly								Redundant	blaTEM-1A	1
GCA_002952895.1	6A	not applicable	10	ncbi	Assembly								Redundant	blaTEM-1A	1
GCA_002952915.1	3FA	not applicable	10	ncbi	Assembly								Redundant	blaTEM-1A	1
GCA_002952935.1	3A	not applicable	10	ncbi	Assembly								Redundant	blaTEM-1A	1
GCA_002952955.1	2_0	not applicable	10	ncbi	Assembly								Redundant	blaTEM-1A	1
GCA_002952995.1	9A	not applicable	10	ncbi	Assembly								Redundant	blaTEM-1A	1
GCA_002953015.1	9FA	not applicable	10	ncbi	Assembly								Redundant	blaTEM-1A	1
GCA_002953035.1	8A	not applicable	10	ncbi	Assembly								Redundant	blaTEM-1A	1
GCA_002953055.1	5A	not applicable	10	ncbi	Assembly								Redundant	blaTEM-1A	1
GCA_002953075.1	2FA	not applicable	10	ncbi	Assembly								Redundant	blaTEM-1A	1
GCA_002953095.1	1FA	not applicable	10	ncbi	Assembly								Redundant	blaTEM-1A	1
GCA_002953755.1	8FA	not applicable	10	ncbi	Assembly								Redundant	blaTEM-1A	1
GCA_002953775.1	7A	not applicable	10	ncbi	Assembly								Redundant	blaTEM-1A	1
GCA_002953795.1	5FA	not applicable	10	ncbi	Assembly								Redundant	blaTEM-1A	1
GCA_002953815.1	4FA	not applicable	10	ncbi	Assembly								Redundant	blaTEM-1A	1
GCA_002953835.1	4A	not applicable	10	ncbi	Assembly								Redundant	blaTEM-1A	1
GCA_002953855.1	2F_0	not applicable	10	ncbi	Assembly								Redundant	blaTEM-1A	1
GCA_002953875.1	2A	not applicable	10	ncbi	Assembly								Redundant	blaTEM-1A	1
GCA_002953895.1	1A	not applicable	10	ncbi	Assembly								Redundant	blaTEM-1A	1
GCA_002959225.1	YH17137	China: Guangdong	10	ncbi	Assembly		blaCTX-M-65				S83L/D87N		Redundant	tet(A);rmtB;oqxB;aph(3')-Ia;sul2;floR;erm(42);mph(A);tet(M);dfrA1;oqxA;sul3;blaCTX-M-65;aac(3)-IId;fosA;qepA;dfrA12;sul1;blaTEM-1B;mcr-1.1	20
GCA_002959295.1	YH17129	China: Heilongjiang	10	ncbi	Assembly		blaCTX-M-55				S83L/D87N			dfrA12;oqxB;aph(3')-Ia;blaTEM-1B;tet(A);mph(A);aac(3)-IId;aadA2;oqxA;blaCTX-M-55;mcr-1.1	11
GCA_002966145.1	K-12 substr. MG1655	missing	10	ncbi	Assembly								Redundant		0
GCA_002991705.1	SC411	China	10	ncbi	Assembly				recombined (not phylogroup D)					QnrS1;dfrA12;oqxA;aadA2;cmlA1;aadA1;sul3;floR;blaTEM-1B;strB;strA;tet(A);oqxB;mcr-1.1	14
GCA_002991805.1	SC110	China	10	ncbi	Assembly									floR;aph(3')-Ic;tet(A);QnrS2;mcr-1.1	5
GCA_003008995.1	sc14-205	China:Sichuan	10	ncbi	Assembly				recombined (not phylogroup D)		S83L/D87				0
GCA_003009495.1	10f58	China:Shanghai	10	ncbi	Assembly									tet(B);mcr-1.1	2
GCA_003009545.1	Eqsg1-4g	China:Shandong	10	ncbi	Assembly		blaCTX-M-15		frameshift		S83L/D87N			sul2;tet(A);oqxB;aph(4)-Ia;aac(6')Ib-cr;aac(3)-IVa;catB3;sul3;dfrA1;aph(3')-Ia;blaTEM-1B;ARR-3;sul1;oqxA;fosA;dfrA12;cmlA1;aadA1;floR;blaCTX-M-15;blaOXA-1;mcr-1.1	22
GCA_003009975.1	sc11-29	China:Sichuan	10	ncbi	Assembly		blaCTX-M-14		recombined (not phylogroup D)		S83L/D87N		Redundant	oqxB;sul2;strA;strB;tet(A);floR;blaCTX-M-14;dfrA12;mph(A);oqxA;erm(B);blaTEM-1B;aac(3)-IId;aadA2;mcr-1.1	15
GCA_003010005.1	sc11-30	China:Sichuan	10	ncbi	Assembly		blaCTX-M-14		recombined (not phylogroup D)		S83L/D87N			strA;oqxB;blaCTX-M-14;tet(A);sul2;dfrA12;aph(3')-Ia;mph(A);oqxA;strB;erm(B);aac(3)-IId;floR;aadA2;mcr-1.1	15
GCA_003010105.1	13h5	China:Shanghai	10	ncbi	Assembly						S83L/D87N			floR;aph(4)-Ia;oqxB;aadA1;aac(6')Ib-cr;aac(3)-IVa;aadA2;catB3;sul3;dfrA1;ARR-3;tet(A);cmlA1;sul1;oqxA;blaTEM-1B;sul2;blaOXA-1;mcr-1.1	19
GCA_003010375.1	11c13	China:Chongqing	10	ncbi	Assembly				recombined (not phylogroup D)		S83L/D87N			blaTEM-1B;strB;oqxB;aac(3)-IId;sul2;aph(3')-Ia;dfrA17;aadA5;oqxA;tet(A);strA;mcr-1.1	12
GCA_003030025.1	CFSAN064036	Denmark	10	ncbi	Assembly				recombined (not phylogroup D)					tet(A);blaTEM-1B;sul1;aadA1;dfrA1;strB;strA;sul2	8
GCA_003033905.1	26561	France	10	ncbi	Assembly		blaCTX-M-14				S83L/D87N		Redundant	blaCTX-M-14;aph(3')-Ia;strB;strA;sul2;catA1;blaTEM-1B;tet(B)	8
GCA_003052645.1	J53	missing	10	ncbi	Assembly								Redundant		0
GCA_003052665.1	ME8067	missing	10	ncbi	Assembly										0
GCA_003086215.1	HN503E1II	Cameroon: Yaounde	10	ncbi	Assembly		blaCTX-M-15							QnrS1;blaCTX-M-15;tet(A);dfrA14;mph(A);sul2;strA;strB;blaTEM-1B	9
GCA_003114695.1	ME8162	Japan:Tsukuba	10	ncbi	Assembly										0
GCA_003114715.1	RC30	USA:CT	10	ncbi	Assembly										0
GCA_003114735.1	R1	Japan:Yokosuka	10	ncbi	Assembly								Redundant	aph(3')-IIa	1
GCA_003114755.1	R2	Japan:Yokosuka	10	ncbi	Assembly								Redundant	aph(3')-IIa	1
GCA_003114775.1	R3	Japan:Yokosuka	10	ncbi	Assembly										0
GCA_003114795.1	R4	Japan:Yokosuka	10	ncbi	Assembly								Redundant	aph(3')-IIa	1
GCA_003145165.1	Win2012_WWKa_OUT_26	Germany: Dresden-Kaditz	10	ncbi	Assembly									dfrA14;blaTEM-1B;sul1;aadA1;dfrA1;blaTEM-1B;tet(A);mph(B)	7
GCA_003145235.1	Win2012_WWKa_NEU_16	Germany: Dresden-Kaditz	10	ncbi	Assembly						S83L/D87N		Redundant		0
GCA_003145525.1	Win2012_WWKa_NEU_1	Germany: Dresden-Kaditz	10	ncbi	Assembly										0
GCA_003145755.1	Spr2013_WWKa_OUT_32	Germany: Dresden-Kaditz	10	ncbi	Assembly		blaCTX-M-1		recombined (not phylogroup D)		S83L/D87			blaCTX-M-1;tet(B);dfrA1;aadA1	4
GCA_003145975.1	Spr2013_WWKa_ALT_41	Germany: Dresden-Kaditz	10	ncbi	Assembly										0
GCA_003146195.1	Spr2012_WWKa_NEU_51	Germany: Dresden-Kaditz	10	ncbi	Assembly									strB;strA;sul2;blaTEM-1B;dfrA8	5
GCA_003146215.1	Spr2012_WWKa_NEU_24	Germany: Dresden-Kaditz	10	ncbi	Assembly								Redundant		0
GCA_003146385.1	Spr2012_WWKa_OUT_25	Germany: Dresden-Kaditz	10	ncbi	Assembly						S83L/D87N			tet(B);dfrA7;sul1;blaTEM-1B	4
GCA_003150815.1	VH1	China:Qingdao	10	ncbi	Assembly	blaNDM-5								blaNDM-5	1
GCA_003171835.1	WCHEC050622C1G0M9	China: Chengdu, Sichuan	10	ncbi	Assembly		blaCTX-M-125						Redundant	blaCTX-M-125;mcr-1.1	2
GCA_003171845.1	WCHEC050622C2G1000M9	China: Chengdu, Sichuan	10	ncbi	Assembly		blaCTX-M-125						Redundant	blaCTX-M-125;mcr-1.1	2
GCA_003171875.1	WCHEC050622C2G1000	China: Chengdu, Sichuan	10	ncbi	Assembly		blaCTX-M-125						Redundant	blaCTX-M-125;mcr-1.1	2
GCA_003171895.1	WCHEC050618C2G1000M9	China: Chengdu, Sichuan	10	ncbi	Assembly								Redundant	mcr-1.1	1
GCA_003171905.1	WCHEC050622C1G1000M9	China: Chengdu, Sichuan	10	ncbi	Assembly		blaCTX-M-125						Redundant	blaCTX-M-125;mcr-1.1	2
GCA_003171935.1	WCHEC050618C2G1000	China: Chengdu, Sichuan	10	ncbi	Assembly								Redundant	mcr-1.1	1
GCA_003171955.1	WCHEC050618C2G0M9	China: Chengdu, Sichuan	10	ncbi	Assembly								Redundant	mcr-1.1	1
GCA_003171975.1	WCHEC050618C2G0	China: Chengdu, Sichuan	10	ncbi	Assembly								Redundant	mcr-1.1	1
GCA_003171985.1	WCHEC050618C1G1000M9	China: Chengdu, Sichuan	10	ncbi	Assembly								Redundant	mcr-1.1	1
GCA_003171995.1	WCHEC050618C1G1000	China: Chengdu, Sichuan	10	ncbi	Assembly								Redundant	mcr-1.1	1
GCA_003172035.1	WCHEC050618C1G0M9	China: Chengdu, Sichuan	10	ncbi	Assembly								Redundant	mcr-1.1	1
GCA_003172055.1	WCHEC050618C1G0	China: Chengdu, Sichuan	10	ncbi	Assembly								Redundant	mcr-1.1	1
GCA_003172115.1	WCHEC050604C4G1000	China: Chengdu, Sichuan	10	ncbi	Assembly								Redundant	mcr-1.7	1
GCA_003172135.1	WCHEC050604C3G1000	China: Chengdu, Sichuan	10	ncbi	Assembly								Redundant	mcr-1.1	1
GCA_003172145.1	WCHEC050604C4G0	China: Chengdu, Sichuan	10	ncbi	Assembly								Redundant	mcr-1.7	1
GCA_003172155.1	WCHEC050604C3G0	China: Chengdu, Sichuan	10	ncbi	Assembly								Redundant	mcr-1.7	1
GCA_003172195.1	WCHEC050604C2G1000M9	China: Chengdu, Sichuan	10	ncbi	Assembly								Redundant	mcr-1.7	1
GCA_003172215.1	WCHEC050604C2G0M9	China: Chengdu, Sichuan	10	ncbi	Assembly								Redundant	mcr-1.7	1
GCA_003172225.1	WCHEC050604C2G1000	China: Chengdu, Sichuan	10	ncbi	Assembly		blaCTX-M-125						Redundant	blaCTX-M-125;mcr-1.1	2
GCA_003172235.1	WCHEC050622C2G0M9	China: Chengdu, Sichuan	10	ncbi	Assembly		blaCTX-M-125						Redundant	blaCTX-M-125;mcr-1.1	2
GCA_003172275.1	WCHEC050622C2G0	China: Chengdu, Sichuan	10	ncbi	Assembly		blaCTX-M-125						Redundant	blaCTX-M-125;mcr-1.1	2
GCA_003172285.1	WCHEC050622C1G1000	China: Chengdu, Sichuan	10	ncbi	Assembly		blaCTX-M-125						Redundant	blaCTX-M-125;mcr-1.1	2
GCA_003172315.1	WCHEC050622C1G0	China: Chengdu, Sichuan	10	ncbi	Assembly		blaCTX-M-125						Redundant	blaCTX-M-125;mcr-1.1	2
GCA_003172435.1	WCHEC050604C1G0	China: Chengdu, Sichuan	10	ncbi	Assembly								Redundant	mcr-1.7	1
GCA_003172455.1	WCHEC035053S1G0M9	China: Chengdu, Sichuan	10	ncbi	Assembly								Redundant		0
GCA_003172465.1	WCHEC035053S1G0	China: Chengdu, Sichuan	10	ncbi	Assembly								Redundant		0
GCA_003172475.1	WCHEC025943C2G1000LB	China: Chengdu, Sichuan	10	ncbi	Assembly	blaNDM-5	blaCTX-M-65						Redundant	aadA22;aph(4)-Ia;tet(M);blaCTX-M-65;oqxB;sul2;blaNDM-5;sul1;oqxA;strB;aac(3)-IVa;aph(3')-Ic;floR;blaTEM-1B;mph(A);strA;lnu(F);mcr-1.1	18
GCA_003172515.1	WCHEC050604C2G0	China: Chengdu, Sichuan	10	ncbi	Assembly								Redundant	mcr-1.7	1
GCA_003172535.1	WCHEC050604C1G1000M9	China: Chengdu, Sichuan	10	ncbi	Assembly								Redundant	mcr-1.7	1
GCA_003172555.1	WCHEC035053S1G1000M9	China: Chengdu, Sichuan	10	ncbi	Assembly								Redundant		0
GCA_003172575.1	WCHEC050604C1G1000	China: Chengdu, Sichuan	10	ncbi	Assembly								Redundant	mcr-1.7	1
GCA_003172595.1	WCHEC035053S1G1000	China: Chengdu, Sichuan	10	ncbi	Assembly								Redundant		0
GCA_003172615.1	WCHEC025943C3G1000M9	China: Chengdu, Sichuan	10	ncbi	Assembly	blaNDM-5	blaCTX-M-65						Redundant	blaTEM-1B;tet(M);blaCTX-M-65;oqxB;blaNDM-5;lnu(F);oqxA;aph(3')-Ic;sul2;sul1;strA;aph(4)-Ia;aac(3)-IVa;floR;mph(A);strB;aadA22;mcr-1.1	18
GCA_003172635.1	WCHEC025943C2G1000M9	China: Chengdu, Sichuan	10	ncbi	Assembly	blaNDM-5	blaCTX-M-65						Redundant	blaCTX-M-65;oqxB;tet(M);sul2;blaNDM-5;lnu(F);aph(3')-Ic;sul1;strA;oqxA;aph(4)-Ia;aac(3)-IVa;floR;blaTEM-1B;mph(A);strB;aadA22;mcr-1.1	18
GCA_003172645.1	WCHEC025943C1G1000LB	China: Chengdu, Sichuan	10	ncbi	Assembly	blaNDM-5	blaCTX-M-65						Redundant	blaTEM-1B;aadA22;aph(4)-Ia;floR;tet(M);oqxB;blaCTX-M-65;blaNDM-5;sul1;oqxA;sul2;strA;aac(3)-IVa;aph(3')-Ic;mph(A);strB;lnu(F);mcr-1.1	18
GCA_003172655.1	WCHEC025943C1G0	China: Chengdu, Sichuan	10	ncbi	Assembly	blaNDM-5	blaCTX-M-65						Redundant	blaTEM-1B;aph(4)-Ia;tet(M);floR;oqxB;blaCTX-M-65;blaNDM-5;lnu(F);mph(A);sul1;sul2;strA;oqxA;aac(3)-IVa;aph(3')-Ic;strB;aadA22;mcr-1.1	18
GCA_003172695.1	WCHEC050604C1G0M9	China: Chengdu, Sichuan	10	ncbi	Assembly								Redundant	mcr-1.7	1
GCA_003172715.1	WCHEC035053S2G1000M9	China: Chengdu, Sichuan	10	ncbi	Assembly								Redundant		0
GCA_003172725.1	WCHEC035053S2G0M9	China: Chengdu, Sichuan	10	ncbi	Assembly								Redundant		0
GCA_003172755.1	WCHEC025943C2G0	China: Chengdu, Sichuan	10	ncbi	Assembly	blaNDM-5	blaCTX-M-65							blaTEM-1B;aadA22;aph(4)-Ia;blaCTX-M-65;oqxB;tet(M);blaNDM-5;mph(A);sul2;sul1;oqxA;strB;aac(3)-IVa;aph(3')-Ic;floR;strA;lnu(F);mcr-1.1	18
GCA_003172765.1	WCHEC035053S2G1000	China: Chengdu, Sichuan	10	ncbi	Assembly								Redundant		0
GCA_003172785.1	WCHEC035053S2G0	China: Chengdu, Sichuan	10	ncbi	Assembly								Redundant		0
GCA_003172815.1	WCHEC025943C1G1000M9	China: Chengdu, Sichuan	10	ncbi	Assembly	blaNDM-5	blaCTX-M-65						Redundant	blaTEM-1B;floR;tet(M);oqxB;blaCTX-M-65;blaNDM-5;lnu(F);oqxA;aph(3')-Ic;sul2;sul1;strA;aph(4)-Ia;aac(3)-IVa;mph(A);strB;aadA22;mcr-1.1	18
GCA_003175255.1	TUM1134	missing	10	ncbi	Assembly								Redundant	blaTEM-94;strB;sul1;tet(B);strA;aac(3)-IIa;aadA1;dfrA1;aph(3')-Ic	9
GCA_003175275.1	TUM1135	missing	10	ncbi	Assembly						S83S/D87G		Redundant	blaTEM-10;aph(3')-Ic;sul2;strB;tet(B);strA	6
GCA_003175295.1	TUM1136	missing	10	ncbi	Assembly						S83S/D87G		Redundant	aac(3)-Ic;blaOXA-4;sul1;strA;strB;blaTEM-6;catA1;aph(3')-Ic	8
GCA_003175885.1	TUM1521	missing	10	ncbi	Assembly						S83/D87N		Redundant	blaTEM-1A	1
GCA_003175975.1	TUM1522	missing	10	ncbi	Assembly						S83/D87N				0
GCA_003176275.1	TUM1809	missing	10	ncbi	Assembly									catA1;blaTEM-10;aac(3)-IIa	3
GCA_003176315.1	TUM1813	missing	10	ncbi	Assembly									tet(A);sul1;aacA4;blaTEM-8	4
GCA_003176355.1	TUM1825	missing	10	ncbi	Assembly								Redundant	tet(A);aph(3')-Ib;blaTEM-2	3
GCA_003176375.1	TUM1826	missing	10	ncbi	Assembly						S83S/D87G		Redundant	sul1;aacA4;tet(A)	3
GCA_003180975.1	DA33133	Sweden	10	ncbi	Assembly		blaCTX-M-15				S83L/D87N			erm(B);aac(3)-IId;aac(6')Ib-cr;blaOXA-1;dfrA17;aadA5;sul1;mph(A);mph(A);sul1;aadA5;dfrA17;blaCTX-M-15	9
GCA_900015955.1	JF733	Germany52.028.53	10	ncbi	Assembly										0
GCA_900039535.1	F13P5		10	ncbi	Assembly		blaCTX-M-15		recombined (not phylogroup D)				Redundant	sul2;blaTEM-1B;dfrA14;strB;aadA1;fosA;tet(B);blaCTX-M-15	8
GCA_900044035.1	F25P5		10	ncbi	Assembly									tet(A);dfrB1;aac(3)-IVa;aadA13;aadA1;blaTEM-52C	6
GCA_900044045.1	F13P4		10	ncbi	Assembly		blaCTX-M-15		recombined (not phylogroup D)					tet(B);strB;dfrA14;fosA;sul2;aadA1;blaTEM-1B;blaCTX-M-15	8
GCA_900087565.2	1		10	ncbi	Assembly								Redundant		0
GCA_900092615.1	NCTC86EC		10	ncbi	Assembly								Redundant		0
GCA_900093965.1	CG54F.G2	Viet Nam	10	ncbi	Assembly						S83L/D87N			sul2;aph(4)-Ia;mef(B);aac(3)-IVa;tet(A);oqxB;aph(3')-Ia;floR;oqxA;dfrA12;aadA2;cmlA1;aadA1;blaTEM-1B;sul3;mcr-1.1	16
GCA_900093975.1	CG48C.A2	Viet Nam	10	ncbi	Assembly						S83L/D87N			tet(A);aph(4)-Ia;dfrA17;aac(3)-IVa;blaTEM-1B;aph(3')-Ic;sul3;sul1;aadA5;dfrA15;dfrA5;tet(M);floR;aadA1;cmlA1;floR;aadA2;mcr-1.1	17
GCA_900093995.1	CG48C.G2	Viet Nam	10	ncbi	Assembly						S83L/D87N		Redundant	tet(A);aph(4)-Ia;aac(3)-IVa;blaTEM-1B;aadA2;aph(3')-Ic;sul1;cmlA1;dfrA15;dfrA5;tet(M);aadA1;floR;sul3;mcr-1.1	15
GCA_900096785.1	102		10	ncbi	Assembly								Redundant		0
GCA_900096795.1	103		10	ncbi	Assembly								Redundant		0
GCA_900096805.1	107		10	ncbi	Assembly										0
GCA_900096815.1	105		10	ncbi	Assembly								Redundant		0
GCA_900096825.1	104		10	ncbi	Assembly								Redundant		0
GCA_900096835.1	109		10	ncbi	Assembly								Redundant		0
GCA_900096845.1	106		10	ncbi	Assembly								Redundant		0
GCA_900096855.1	108		10	ncbi	Assembly								Redundant		0
GCA_900096865.1	101		10	ncbi	Assembly								Redundant		0
GCA_900097005.1	K802	USA40.10105.17	10	ncbi	Assembly								Redundant		0
GCA_900177355.1	ATCC 15597	missing	10	ncbi	Assembly								Redundant		0
GCA_900195385.1	F1_28D	Australia	10	ncbi	Assembly									dfrA17;tet(A);aadA5;sul1	4
GCA_900195435.1	F1_24D	Australia	10	ncbi	Assembly									tet(A)	1
GCA_900195465.1	F1_403E	Australia	10	ncbi	Assembly				recombined (not phylogroup D)				Redundant	aph(3')-Ic;tet(A);dfrA5;aadA1;aadA2;dfrA12;strB;strA;blaTEM-1B;cmlA1	10
GCA_900195595.1	F1_29C	Australia	10	ncbi	Assembly				recombined (not phylogroup D)					blaTEM-1B	1
GCA_900195605.1	F1_401A	Australia	10	ncbi	Assembly				recombined (not phylogroup D)				Redundant	aadA2;strA;dfrA5;dfrA12;sul3;strB;aadA1;cmlA1;aph(3')-Ic;tet(A);blaTEM-1B	11
GCA_900195625.1	F1_403D	Australia	10	ncbi	Assembly				recombined (not phylogroup D)				Redundant	tet(A);dfrA5;aadA2;sul3;strA;dfrA12;aph(3')-Ic;strB;cmlA1;blaTEM-1B	10
GCA_900195645.1	F1_401E	Australia	10	ncbi	Assembly				recombined (not phylogroup D)					aph(3')-Ic;dfrA12;tet(A);dfrA5;sul3;strA;strB;aadA1;cmlA1;blaTEM-1B	10
GCA_900195705.1	F1_402A	Australia	10	ncbi	Assembly				recombined (not phylogroup D)					oqxB;sul3;aph(3')-Ia;tet(A);dfrA12;oqxA;aph(3')-IIa;sul1;cmlA1;aadA2;blaTEM-1B	11
GCA_900195975.1	F2_27	Australia	10	ncbi	Assembly				recombined (not phylogroup D)					dfrA5;strB;sul2;tet(B);blaTEM-1B;strA;aph(3')-Ia	7
GCA_900195985.1	F2_38	Australia	10	ncbi	Assembly				recombined (not phylogroup D)					cmlA1;dfrA12;dfrA5;aadA2;blaTEM-1B;sul3;aph(3')-Ia;sul1;tet(A);strB;strA;aadA1;sul2;aph(3')-IIa	14
GCA_900196015.1	F2_19	Australia	10	ncbi	Assembly									dfrA5;tet(B);sul2;aph(3')-Ia;strA;blaTEM-1B;strB;aadA1	8
GCA_900196145.1	F2_53	Australia	10	ncbi	Assembly								Redundant	dfrA5;tet(B);aph(3')-Ia;sul2;strA;strB;blaTEM-1B;aadA1	8
GCA_900196265.1	F2_63	Australia	10	ncbi	Assembly				recombined (not phylogroup D)					blaTEM-1B;dfrA12;aph(3')-Ia;oqxB;sul3;aadA1;aph(3')-IIa;oqxA;tet(A);cmlA1;sul1;tet(B);strA;strB;aadA2	15
GCA_900196275.1	F2_62	Australia	10	ncbi	Assembly								Redundant	dfrA12;oqxB;aph(3')-IIa;sul3;aph(3')-Ia;aadA1;sul1;blaTEM-1B;oqxA;tet(A);cmlA1;strA;strB	13
GCA_900196285.1	F2_60	Australia	10	ncbi	Assembly									cmlA1;dfrA12;sul1;oqxB;aph(3')-IIa;sul3;aph(3')-Ia;blaTEM-1B;oqxA;tet(A);aadA1;aadA2;strA;strB	14
GCA_900196305.1	F2_64	Australia	10	ncbi	Assembly				recombined (not phylogroup D)				Redundant	strB;strA;cmlA1;dfrA12;sul1;sul2;dfrA5;blaTEM-1B;sul3;aph(3')-Ia;tet(A);aadA1;aph(3')-IIa;aadA2	14
GCA_900196315.1	F2_65	Australia	10	ncbi	Assembly				recombined (not phylogroup D)				Redundant	cmlA1;dfrA12;sul1;blaTEM-1B;sul3;dfrA5;aph(3')-Ia;aadA1;tet(A);aph(3')-IIa;aadA2;sul2	12
GCA_900196335.1	F2_67	Australia	10	ncbi	Assembly								Redundant	dfrA12;sul1;oqxB;aph(3')-IIa;sul3;aph(3')-Ia;aadA1;blaTEM-1B;oqxA;tet(A);cmlA1;aadA2;strA;strB	14
GCA_900196355.1	F2_78	Australia	10	ncbi	Assembly								Redundant	dfrA12;sul1;aph(3')-IIa;strA;sul3;strB;aadA1;tet(A);cmlA1;aadA2	10
GCA_900196425.1	F2_76	Australia	10	ncbi	Assembly										0
GCA_900196435.1	F2_91	Australia	10	ncbi	Assembly								Redundant	tet(A);sul3;aadA1;cmlA1;aadA2	5
GCA_900196445.1	F2_68	Australia	10	ncbi	Assembly								Redundant	cmlA1;dfrA12;sul1;oqxB;aph(3')-IIa;sul3;aph(3')-Ia;oqxA;tet(A);aadA1;aadA2;strA;strB;blaTEM-1B	14
GCA_900196485.1	F2_96	Australia	10	ncbi	Assembly								Redundant	tet(A);sul3;aadA1;cmlA1;aadA2	5
GCA_900196495.1	F2_80	Australia	10	ncbi	Assembly								Redundant	cmlA1;aph(3')-IIa;strA;sul3;sul1;strB;aadA2;aadA1;dfrA12;tet(A)	10
GCA_900196585.1	F2_11	Australia	10	ncbi	Assembly									strA;dfrA5;tet(B);sul3;sul2;aph(3')-Ia;aadA1;cmlA1;strB;aadA2;blaTEM-1B;dfrA12	12
GCA_900196675.1	F2_97	Australia	10	ncbi	Assembly									tet(A);sul3;aadA1;cmlA1;aadA2	5
GCA_900236075.1	A4157S1		10	ncbi	Assembly										0
GCA_900236095.1	A4157S3		10	ncbi	Assembly										0
GCA_900236105.1	AT4157		10	ncbi	Assembly								Redundant		0
GCA_900236115.1	CIP61R		10	ncbi	Assembly										0
GCA_900236125.1	NCTC86R		10	ncbi	Assembly								Redundant		0
GCA_900236145.1	NC86S1		10	ncbi	Assembly										0
GCA_900236155.1	NC86S2		10	ncbi	Assembly								Redundant		0
GCA_900236165.1	NC86_S3		10	ncbi	Assembly										0
GCA_900239835.1	R0007_203	Tanzania-3.32037.327Moshi, Kilimanjaro	10	ncbi	Assembly						S83L/D87N	S80I/E84		aac(6')Ib-cr;dfrA14;strB;blaTEM-1C;sul2;tet(A);blaOXA-1	7
GCA_900239845.1	R0008_340B	Tanzania-3.32037.327Moshi, Kilimanjaro	10	ncbi	Assembly									strB;tet(A);dfrA14;sul2	4
GCA_900239925.1	RDK02_97	Tanzania-3.32037.327Moshi, Kilimanjaro	10	ncbi	Assembly						S83L/D87N	S80I/E84		aadA5;aac(6')Ib-cr;catB3;mph(A);tet(B);sul1;blaOXA-1;dfrA17	8
GCA_000295775.2	J96	unknown	12	ncbi	Assembly										0
GCA_000350985.1	KTE189	unknown	12	ncbi	Assembly									strB;strA;sul2;blaTEM-1B	4
GCA_000353185.1	KTE104	unknown	12	ncbi	Assembly									strB;sul2;blaTEM-1B;strA	4
GCA_000387825.2	HM27	USA: MI	12	ncbi	Assembly										0
GCA_000408125.1	KTE195	unknown	12	ncbi	Assembly									blaTEM-1B;dfrA1;aadA1;sul1;tet(B)	5
GCA_000456065.1	HVH 4 (4-7276109)	Denmark	12	ncbi	Assembly									blaTEM-1B;strB;strA;sul2;blaTEM-1B;strB;strA;sul2	4
GCA_000457105.1	HVH 78 (4-2735946)	Denmark	12	ncbi	Assembly									tet(B)	1
GCA_000457555.1	HVH 111 (4-7039018)	Denmark	12	ncbi	Assembly										0
GCA_000458015.1	HVH 138 (4-6066704)	Denmark	12	ncbi	Assembly										0
GCA_000458115.1	HVH 143 (4-5674999)	Denmark	12	ncbi	Assembly										0
GCA_000458575.1	HVH 171 (4-3191958)	Denmark	12	ncbi	Assembly										0
GCA_000458995.1	HVH 197 (4-4466217)	Denmark	12	ncbi	Assembly									dfrA5;dfrA5;blaTEM-1B;dfrA1;aadA1;sul1;tet(A);sul2;strA;strB	9
GCA_000459535.1	HVH 228 (4-7787030)	Denmark	12	ncbi	Assembly										0
GCA_000460655.1	UMEA 3185-1	Sweden	12	ncbi	Assembly										0
GCA_000460695.1	UMEA 3193-1	Sweden	12	ncbi	Assembly										0
GCA_000461035.1	UMEA 3244-1	Sweden	12	ncbi	Assembly										0
GCA_000461815.1	UMEA 3955-1	Sweden	12	ncbi	Assembly										0
GCA_000461835.1	UMEA 4075-1	Sweden	12	ncbi	Assembly										0
GCA_000488115.1	UMEA 3693-1	Sweden	12	ncbi	Assembly										0
GCA_000633655.1	BIDMC 83	unknown	12	ncbi	Assembly										0
GCA_000700145.1	3-105-05_S4_C2	Tanzania	12	ncbi	Assembly									blaTEM-1B;tet(A);strB;strA;sul2;catA1;dfrA7;sul1	8
GCA_000777135.1	upec-40	USA: WA	12	ncbi	Assembly										0
GCA_000777495.1	upec-285	USA: WA	12	ncbi	Assembly										0
GCA_000778485.1	upec-207	USA: WA	12	ncbi	Assembly									blaTEM-1B;sul2;sul1;strA;mph(A);aadA2;strB;dfrA12	8
GCA_000779255.1	upec-201	USA: WA	12	ncbi	Assembly										0
GCA_000780115.1	upec-166	USA: WA	12	ncbi	Assembly									sul1;aadA1	2
GCA_000780195.1	upec-158	USA: WA	12	ncbi	Assembly									tet(B);blaTEM-1B	2
GCA_000780675.1	upec-14	USA: WA	12	ncbi	Assembly									blaTEM-1B;sul2;strA;strB;tet(A)	5
GCA_001054145.1	1225_ECOL	USA: WA	12	ncbi	Assembly										0
GCA_001059375.1	929.rep2_ECOL	USA: WA	12	ncbi	Assembly									0	0
GCA_001076105.1	1187_ECOL	USA: WA	12	ncbi	Assembly										0
GCA_001306685.1	UCD-JA30	USA: Sacramento, CA	12	ncbi	Assembly										0
GCA_001448025.1	VACI-14	USA: Baltimore	12	ncbi	Assembly									dfrA12;aadA2;sul1;mph(A);sul2;strA;strB;tet(B);blaTEM-1B	9
GCA_001463205.1	50639799	Norway	12	ncbi	Assembly	blaVIM-29	blaCTX-M-15							sul2;blaCTX-M-15;aac(6')Ib-cr;aac(3)-IIa;blaCMY-4;floR;blaVIM-29;dfrA1;tet(A);blaOXA-1;strB;strA	12
GCA_001519645.1	GN02639	USA	12	ncbi	Assembly									blaTEM-1B;tet(B)	2
GCA_001519675.1	GN02137	USA	12	ncbi	Assembly									dfrA1;aadA1	2
GCA_001520845.1	GN02820	USA	12	ncbi	Assembly									aac(3)-IId;sul1;blaTEM-1B;aadA5;dfrA17	5
GCA_001521015.1	GN02867	USA	12	ncbi	Assembly									tet(B);blaTEM-1B	2
GCA_001521225.1	GN02350	USA	12	ncbi	Assembly									blaSHV-1;dfrA1;aadA1;sul1	4
GCA_001521315.1	GN03786	USA	12	ncbi	Assembly									blaTEM-1B	1
GCA_001521635.1	GN04153	USA	12	ncbi	Assembly										0
GCA_001621915.1	GN05992	USA	12	ncbi	Assembly										0
GCA_001651625.1	UPEC_008	unknown	12	ncbi	Assembly										0
GCA_001651715.1	UPEC_001	unknown	12	ncbi	Assembly									strA;blaTEM-1B;tet(A);strB;sul2	5
GCA_001865915.1	No.12	Slovakia	12	ncbi	Assembly										0
GCA_001865925.1	80//6	Estonia	12	ncbi	Assembly										0
GCA_001865985.1	B-11870	Sweden	12	ncbi	Assembly									tet(B);aph(3')-Ia;sul1;aadA1	4
GCA_001900395.1	D8	unknown	12	ncbi	Assembly										0
GCA_002155835.1	MEH_VIC	Lebanon	12	ncbi	Assembly									strA;sul2;blaCMY-60	3
GCA_002163275.1	BIDMC116	USA: Massachusetts, Boston	12	ncbi	Assembly									tet(B);blaTEM-1B	2
GCA_002189745.1	ECOR53	USA: Iowa	12	ncbi	Assembly										0
GCA_002189835.1	ECOR60	Sweden	12	ncbi	Assembly										0
GCA_002189955.1	ECOR59	USA: Massachusetts	12	ncbi	Assembly										0
GCA_002230015.1	MOD1-EC5453	USA:NY	12	ncbi	Assembly										0
GCA_002230975.1	MOD1-EC5275	USA:OK	12	ncbi	Assembly										0
GCA_002232455.1	MOD1-EC5095	USA:NY	12	ncbi	Assembly										0
GCA_002232615.1	MOD1-EC5093	USA:NY	12	ncbi	Assembly									tet(B);blaTEM-1B	2
GCA_002232895.1	MOD1-EC5074	USA:NY	12	ncbi	Assembly									sul2;strA;strB;tet(A)	4
GCA_002244155.1	265-3386	USA: Seattle	12	ncbi	Assembly										0
GCA_002244195.1	265-3396	USA: Seattle	12	ncbi	Assembly										0
GCA_002244205.1	265-3407	USA: Seattle	12	ncbi	Assembly										0
GCA_002244235.1	265-3446	USA: Seattle	12	ncbi	Assembly										0
GCA_002244925.1	30-398	USA: Seattle	12	ncbi	Assembly									tet(B);blaTEM-1B	2
GCA_002268245.1	EC-117-6-4	Sweden	12	ncbi	Assembly										0
GCA_002268255.1	EC-117-2-3	Sweden	12	ncbi	Assembly										0
GCA_002268295.1	EC-117-6-1	Sweden	12	ncbi	Assembly										0
GCA_002268325.1	EC-117-5-4	Sweden	12	ncbi	Assembly									strB;blaTEM-1C;strA;sul2	4
GCA_002268385.1	EC-117-4-1	Sweden	12	ncbi	Assembly									sul2;strB;strA;blaTEM-1C	4
GCA_002268395.1	EC-117-3-2	Sweden	12	ncbi	Assembly										0
GCA_002268435.1	EC-117-2-4	Sweden	12	ncbi	Assembly										0
GCA_002268455.1	EC-117-5-3	Sweden	12	ncbi	Assembly									strB;sul2;strA;blaTEM-1C	4
GCA_002464145.1	MOD1-EC6212	Singapore	12	ncbi	Assembly									blaTEM-1B;catA1;tet(B);aadA1;sul1	5
GCA_002465185.1	MOD1-EC726	USA: WA	12	ncbi	Assembly									blaTEM-1B;tet(B)	2
GCA_002465245.1	MOD1-EC717	USA: WA	12	ncbi	Assembly										0
GCA_002465475.1	MOD1-EC702	USA: WA	12	ncbi	Assembly										0
GCA_002466005.1	MOD1-EC683	USA: WA	12	ncbi	Assembly										0
GCA_002469045.1	MOD1-EC6580	Brazil	12	ncbi	Assembly										0
GCA_002484565.1	MOD1-EC6671	USA: LA	12	ncbi	Assembly										0
GCA_002512175.1	MOD1-EC6445	Mexico	12	ncbi	Assembly									tet(A);sul1;aadA1;sul2;catA1;blaTEM-1B;tet(B)	7
GCA_002519465.1	MOD1-EC6940	USA: PA	12	ncbi	Assembly										0
GCA_002519835.1	MOD1-EC6893	USA: ND	12	ncbi	Assembly									blaTEM-1B;tet(B)	2
GCA_002522085.1	MOD1-EC6762	Zambia	12	ncbi	Assembly									sul1;blaTEM-1B;sul2;aph(3')-Ia;strA;strB;catA1;tet(A);dfrA1;dfrA7	10
GCA_002522355.1	MOD1-EC6736	Zambia	12	ncbi	Assembly									catA1;dfrA7;sul1;sul2;aph(3')-Ia;strA;strB;blaTEM-1B;tet(A)	9
GCA_002539255.1	MOD1-EC5953	USA:AK	12	ncbi	Assembly										0
GCA_002541755.1	MOD1-EC6052	Norway	12	ncbi	Assembly									sul2;strA;strB;aadA1;dfrA1	5
GCA_002544825.1	MOD1-EC6246	USA:PA	12	ncbi	Assembly										0
GCA_002545215.1	MOD1-EC6119	USA:AK	12	ncbi	Assembly										0
GCA_002547645.1	MOD1-EC5877	USA:PA	12	ncbi	Assembly										0
GCA_002547855.1	MOD1-EC5872	USA:PA	12	ncbi	Assembly									strB;blaTEM-1B;aph(3')-Ic;tet(B);sul2;strA	6
GCA_002548535.1	MOD1-EC5851	USA:FL	12	ncbi	Assembly										0
GCA_002549505.1	MOD1-EC5786	USA:PA	12	ncbi	Assembly										0
GCA_002810105.1	K56-44	Greece	12	ncbi	Assembly										0
GCA_002888475.1	700417	USA: Texas	12	ncbi	Assembly										0
GCA_002888515.1	700415	USA: Texas	12	ncbi	Assembly									tet(B);aph(3')-Ic;strB;strA;sul2	5
GCA_002941245.1	YH17181	China: Guangdong	12	ncbi	Assembly									aadA5;sul2;strA;strB;tet(A);floR;sul1;blaTEM-1B;aac(3)-IId;mph(A);dfrA17;mcr-1.1	12
GCA_002941705.1	YH17141	China: Guangdong	12	ncbi	Assembly									strA;floR;mph(A);strB;aac(3)-IId;blaTEM-1B;sul1;aadA5;dfrA17;mcr-1.1	10
GCA_003145035.1	Win2012_WWKa_NEU_7	Germany: Dresden-Kaditz	12	ncbi	Assembly									blaTEM-1B;strA;tet(A);sul2;strB	5
ERR1276256	ST38_21	United Kingdom	38	Enterobase	reads	blaOXA-48	blaCTX-M-24				S83L/D87			mph(A);aac(3)-IId;blaOXA-48;dfrA17;aadA5;sul1;blaCTX-M-24	7
ERR1276257	ST38_11	United Kingdom	38	Enterobase	reads	blaOXA-48	blaCTX-M-14			frameshift			Redundant	blaCTX-M-14b;blaOXA-48;catA1;blaTEM-1B;dfrA1;aadA1	6
ERR1276258	ST38_16	United Kingdom	38	Enterobase	reads	blaOXA-48	blaCTX-M-24				S83L/D87			blaCTX-M-24;blaOXA-48;aadA5;dfrA17;aac(3)-IId;sul1;blaTEM-1B;mph(A)	8
ERR1276260	ST38_17	United Kingdom	38	Enterobase	reads	blaOXA-48	blaCTX-M-24				S83L/D87	S80/E84K		mph(A);blaOXA-48;dfrA17;aadA5;sul1;blaTEM-1B;blaCTX-M-24;aac(3)-IId	8
ERR1276261	ST38_23	United Kingdom	38	Enterobase	reads	blaOXA-48					S83A/D87			mph(A);strB;dfrA17;aadA5;blaTEM-1B;blaOXA-48;aac(3)-IId;sul1;tet(D);sul2;catA1;strA	12
ERR1276262	ST38_14	United Kingdom	38	Enterobase	reads	blaOXA-48	blaCTX-M-24				S83L/D87			mph(A);blaOXA-48;blaCTX-M-24;aadA5;aac(3)-IId;dfrA17;sul1;blaTEM-1B	8
ERR1276263	ST38_22	United Kingdom	38	Enterobase	reads	blaOXA-48	blaCTX-M-24				S83L/D87			mph(A);blaCTX-M-24;dfrA17;aadA5;blaOXA-48;strB;aac(3)-IId;strA;sul1;blaTEM-1B;sul2	11
ERR1276264	ST38_3	United Kingdom	38	Enterobase	reads	blaOXA-244	blaCTX-M-14			frameshift				dfrA1;aadA1;strA;blaOXA-244;tet(D);sul2;catA1;blaCTX-M-14b;strB;blaTEM-1B	10
ERR1276265	ST38_10	United Kingdom	38	Enterobase	reads	blaOXA-48	blaCTX-M-14			frameshift				catA1;blaOXA-48;aadA1;dfrA1;blaCTX-M-14b;blaTEM-1B;blaCMY-2	7
ERR1276267	ST38_13	United Kingdom	38	Enterobase	reads	blaOXA-48	blaCTX-M-24				S83L/D87			mph(A);blaOXA-48;dfrA17;aadA5;aac(3)-IId;sul1;blaCTX-M-24;blaTEM-1B	8
ERR1276268	ST38_5	United Kingdom	38	Enterobase	reads	blaOXA-48	blaCTX-M-14			frameshift				blaOXA-48;aadA1;dfrA1;blaCTX-M-14b;blaCMY-2;blaTEM-1B;catA1	7
ERR1276269	ST38_9	United Kingdom	38	Enterobase	reads	blaOXA-48	blaCTX-M-14			frameshift			Redundant	blaOXA-48;blaCMY-2;dfrA1;aadA1;blaCTX-M-14b;catA1;blaTEM-1B	7
ERR1276270	ST38_4	United Kingdom	38	Enterobase	reads	blaOXA-48	blaCTX-M-14			frameshift			Redundant	blaCMY-2;catA1;blaOXA-48;aadA1;dfrA1;blaCTX-M-14b;blaTEM-1B	7
ERR1276271	ST38_6	United Kingdom	38	Enterobase	reads	blaOXA-48	blaCTX-M-14			frameshift			Redundant	blaOXA-48;aadA1;dfrA1;blaCTX-M-14b;blaTEM-1B;catA1	6
ERR1276272	ST38_8	United Kingdom	38	Enterobase	reads	blaOXA-48	blaCTX-M-14			frameshift			Redundant	blaOXA-48;blaCMY-2;blaCTX-M-14b;catA1;blaTEM-1B;dfrA1;aadA1	7
ERR1276273	ST38_15	United Kingdom	38	Enterobase	reads	blaOXA-48	blaCTX-M-24				S83L/D87			aac(3)-IId;blaCTX-M-24;blaOXA-48;sul1;aadA5;dfrA17;blaTEM-1B;mph(A)	8
ERR1276274	ST38_19	United Kingdom	38	Enterobase	reads	blaOXA-48					S83A/D87			blaOXA-48;strB;mph(A);strA;sul2;blaTEM-1B;aac(3)-IId	7
ERR1276275	ST38_12	United Kingdom	38	Enterobase	reads	blaOXA-48	blaCTX-M-24				S83L/D87			blaCTX-M-24;blaOXA-48;mph(A);dfrA17;aadA5;aac(3)-IId;sul1;blaTEM-1B	8
ERR1276276	ST38_7	United Kingdom	38	Enterobase	reads	blaOXA-48	blaCTX-M-14			frameshift				blaCTX-M-14b;blaOXA-48;blaCMY-2;aadA1;dfrA1;blaTEM-1B;catA1	7
ERR1276277	ST38_20	United Kingdom	38	Enterobase	reads	blaOXA-48	blaCTX-M-24				S83L/D87			mph(A);blaOXA-48;blaCTX-M-24;dfrA17;aadA5;aac(3)-IId;sul1	7
ERR1276278	ST38_18	United Kingdom	38	Enterobase	reads	blaOXA-48	blaCTX-M-24				S83L/D87			blaCTX-M-24;aadA5;blaOXA-48;dfrA17;aac(3)-IId;sul1;mph(A)	7
GCA_000351385.1	KTE236	unknown	38	ncbi	Assembly						S83L/D87		Redundant	tet(D);blaTEM-1B;catA1;sul2;strB;strA;sul1;dfrA7	8
GCA_000351405.1	KTE237	unknown	38	ncbi	Assembly						S83L/D87		Redundant	catA1;sul2;strB;strA;sul1;dfrA7;tet(D);blaTEM-1B;catA1	8
GCA_000351705.1	KTE76	Denmark	38	ncbi	Assembly									aadA1;sul1;blaTEM-1C;tet(A);strA;strB;sul2;strB;strA;dfrA1	8
GCA_000408165.1	KTE199	unknown	38	ncbi	Assembly						S83L/D87		Redundant	dfrA7;sul1;tet(D);blaTEM-1B;catA1;sul2;strB;strA	8
GCA_000408665.1	KTE121	Denmark	38	ncbi	Assembly						S83L/D87			tet(D);blaTEM-1B;catA1;sul2;strB;strA	6
GCA_000456645.1	HVH 41 (4-2677849)	Denmark	38	ncbi	Assembly									dfrA1;aadA1;blaTEM-1B;sul2;strB;strA	6
GCA_000459995.1	UMEA 3033-1	Sweden	38	ncbi	Assembly									dfrA5;sul1;strA;strB;sul2;tet(D);blaTEM-1B;catA1;blaTEM-1B	8
GCA_000460495.1	UMEA 3163-1	Sweden	38	ncbi	Assembly										0
GCA_000506505.1	LAU-EC10	Lebanon: Byblos	38	ncbi	Assembly		blaCTX-M-15				S83L/D87			blaCTX-M-15	1
GCA_000513455.1	IS1	Austria:Vienunknown	38	ncbi	Assembly									blaTEM-1B;strA;dfrA1;aph(3')-Ia;aadA1;catA1;strB	7
GCA_000601355.1	1-110-08_S4_C1	Tanzania	38	ncbi	Assembly						S83L/D87			strB;blaTEM-1B;dfrA7;sul2;strA;tet(D);mph(A)	7
GCA_000692875.1	UCI 65	USA: California	38	ncbi	Assembly					frameshift	S83L/D87N	S80I/E84		blaTEM-1B;aac(3)-IId;tet(A);strB;strA;sul2;mph(A);sul1;aadA5;dfrA17	10
GCA_000703865.1	1-392-07_S1_C1	Tanzania	38	ncbi	Assembly									sul2;strB;blaTEM-1B;tet(D);strA	5
GCA_000703885.1	1-392-07_S1_C2	Tanzania	38	ncbi	Assembly									catA1;blaTEM-1B;sul2;tet(D);strA;strB	6
GCA_000711375.1	6-175-07_S1_C2	Tanzania	38	ncbi	Assembly									tet(D);sul2;catA1;dfrA1;aadA1;blaTEM-1B;strA;strB	8
GCA_000713135.1	6-175-07_S1_C3	Tanzania	38	ncbi	Assembly									blaTEM-1B;sul2;dfrA1;aadA1;tet(D);strB;strA;catA1	8
GCA_000778895.1	upec-221	USA: WA	38	ncbi	Assembly									blaTEM-1B;strA;sul2;tet(A);strB	5
GCA_000779975.1	blood-10-180	USA: Pacific Northwest	38	ncbi	Assembly						S83L/D87		Redundant	blaOXA-1;tet(B);strA;strB;dfrA7;aadA1;sul1;sul2;catA1	9
GCA_000780835.1	upec-133	USA: WA	38	ncbi	Assembly					frameshift	S83L/D87N	S80I/E84G		strB;strA;tet(A);sul2;sul1;blaTEM-1B;aadA2;mph(A);dfrA12	9
GCA_000781715.1	blood-10-0183	USA: Pacific Northwest	38	ncbi	Assembly						S83L/D87			sul2;tet(B);strA;dfrA7;blaOXA-1;sul1;aadA1;catA1;strB	9
GCA_001052705.1	105_ECOL	USA: WA	38	ncbi	Assembly										0
GCA_001059795.1	992_ECOL	USA: WA	38	ncbi	Assembly						S83L/D87N	S80I/E84		strB;blaTEM-1B;catA1;tet(D);sul2;sul1;strA;dfrA7	8
GCA_001462975.1	50640492	Norway	38	ncbi	Assembly	blaOXA-48	blaCTX-M-14				S83L/D87	S80I/E84		mph(A);blaCTX-M-14;dfrA17;blaOXA-48;blaTEM-1B;aac(3)-IId;aadA5;sul1	8
GCA_001463345.1	50760471	Norway	38	ncbi	Assembly	blaOXA-48	blaCTX-M-24				S83L/D87			mph(A);dfrA17;aadA5;blaOXA-48;blaTEM-1B;sul1;blaCTX-M-24;aac(3)-IId	8
GCA_001463585.1	50739467	Norway	38	ncbi	Assembly	blaOXA-48	blaCTX-M-14			frameshift				blaOXA-48;blaTEM-1B;catA1;aadA1;dfrA1;blaCTX-M-14b;tet(D)	7
GCA_001466755.1	NCCP 15653	unknown	38	ncbi	Assembly		blaCTX-M-24				S83L/D87			mph(A);blaCTX-M-24;sul1;dfrA5	4
GCA_001519245.1	GN02277	USA	38	ncbi	Assembly									mph(A);sul1;dfrA5;blaTEM-1B	4
GCA_001519615.1	GN02649	USA	38	ncbi	Assembly									strB;strA;sul2;blaTEM-1B;dfrA8	5
GCA_001521415.1	GN04306	USA	38	ncbi	Assembly										0
GCA_001561735.1	B107	United Kingdom	38	ncbi	Assembly									strB;dfrA14;sul2;mph(A);blaTEM-1B;tet(D);strA	7
GCA_001748735.1	VL3001	Israel	38	ncbi	Assembly								Redundant	strB;strA;tet(A)	3
GCA_001749595.1	VL2764	Israel	38	ncbi	Assembly									strA;strB;tet(A)	3
GCA_001890365.1	MRSN346647	USA	38	ncbi	Assembly		blaCTX-M-15							blaTEM-1B;tet(A);strB;strA;sul2;dfrA14;blaCTX-M-15;QnrS1	8
GCA_001900295.1	C1	unknown	38	ncbi	Assembly		blaCTX-M-15						reference	QnrS1;blaCTX-M-15	2
GCA_001942085.1	78B5	Unknown	38	ncbi	Assembly	blaOXA-244	blaCTX-M-14			frameshift			Redundant	blaCTX-M-14b;catA1;blaOXA-244;blaTEM-1B;dfrA1;aadA1	6
GCA_001942145.1	35j9	France	38	ncbi	Assembly	blaOXA-244				frameshift				catA1;blaOXA-244;sul2;strA;tet(D);strB;aadA1;dfrA1;tet(B);dfrA14;mph(A)	11
GCA_001942175.1	69000000	Unknown	38	ncbi	Assembly	blaOXA-244	blaCTX-M-14			frameshift			Redundant	blaCTX-M-14b;blaOXA-244;aadA1;dfrA1;blaTEM-1B;catA1	6
GCA_001981465.1	ICBEc10	Brazil: Amazon	38	ncbi	Assembly		blaCTX-M-14				S83L/D87Y	S80I/E84		mph(A);erm(B);blaCTX-M-14;sul1;aadA2;dfrA12	6
GCA_002012045.1	Ecol_545	vietnam: Ho Chi Minh City	38	ncbi	Assembly	blaKPC-2	blaCTX-M-27/blaCTX-M-15							blaCTX-M-27;QnrS1;blaCTX-M-15;aac(6')Ib-cr;blaOXA-1;catB3;blaKPC-2;blaTEM-1B;blaCTX-M-15	8
GCA_002018815.1	ICBECAM5	Brazil: Sao Paulo	38	ncbi	Assembly		blaCTX-M-14				S83L/D87Y	S80I/E84		aac(3)-IIa;strA;blaCTX-M-14;strB;sul2	5
GCA_002099695.1	KCJK2329	USA:FL	38	ncbi	Assembly		blaCTX-M-15							QnrS1;blaCTX-M-15;blaTEM-1B;strB;strA;sul2;tet(A);dfrA14	8
GCA_002104405.1	6M	Brazil: Santos	38	ncbi	Assembly		blaCTX-M-27							strB;mph(A);sul2;strA;blaCTX-M-27;sul1;aadA5;dfrA17	8
GCA_002109605.1	M056	unknown	38	ncbi	Assembly										0
GCA_002155385.1	AUH_IMP199	Lebanon	38	ncbi	Assembly	blaOXA-48	blaCTX-M-24				S83L/D87			mph(A);blaCTX-M-24;dfrA17;aac(3)-IId;aadA5;sul1;blaOXA-48;blaTEM-1B	8
GCA_002155515.1	AUH_IMP314	Lebanon	38	ncbi	Assembly	blaOXA-48	blaCTX-M-24				S83L/D87			mph(A);blaCTX-M-24;dfrA17;aac(3)-IId;aadA5;blaOXA-48;sul1;blaTEM-1B	8
GCA_002223705.1	FC10255	China: Beijing	38	ncbi	Assembly	blaIMP-4	blaCTX-M-14				S83L/D87N	S80I/E84		QnrS1;blaIMP-4;sul1;blaCTX-M-14;tet(B);dfrA1;aadA1	7
GCA_002223865.1	CoR-29	China: Hangzhou	38	ncbi	Assembly		blaCTX-M-14				S83L/D87			blaCTX-M-14;QnrD	2
GCA_002224705.1	NA057	India	38	ncbi	Assembly						S83L/D87Y	S80I/E84		dfrA7;sul1	2
GCA_002230145.1	MOD1-EC5456	USA:NY	38	ncbi	Assembly									blaTEM-1B;strB;strA;catA1;tet(D);sul2;sul1;dfrA7	8
GCA_002231735.1	MOD1-EC5182	USA:NY	38	ncbi	Assembly										0
GCA_002240945.1	ICBEcBL-III-02(2)	Brazil: Amazon	38	ncbi	Assembly		blaCTX-M-15				S83L/D87			blaCTX-M-15;mph(A);tet(B);aadA5;dfrA17;aac(6')Ib-cr;sul1;blaOXA-1	8
GCA_002240955.1	ICBEc09	Brazil: Amazon	38	ncbi	Assembly		blaCTX-M-14				S83L/D87Y	S80I/E84		dfrA12;aadA2;erm(B);sul1;aac(3)-IIa;blaCTX-M-14;mph(A)	7
GCA_002310595.1	144	United Kingdom: Scotland	38	ncbi	Assembly									strB;strA;sul2;blaTEM-1B;dfrA5;blaCMY-2	6
GCA_002407385.1	NA090	India: Pune	38	ncbi	Assembly		blaCTX-M-15				S83L/D87N	S80I/E84G		sul2;tet(A);aac(3)-IIa;aadA1;aac(6')Ib-cr;strB;blaCTX-M-15;dfrA1;strA;blaOXA-1	10
GCA_002441995.1	22_Esco_HA-NL	Netherlands	38	ncbi	Assembly		blaCTX-M-14				S83L/D87Y	S80I/E84		dfrA12;aadA2;strB;strA;sul1;sul2;aac(3)-IIa;blaCTX-M-14;mph(A)	9
GCA_002442325.1	37_Esco_HA-DE	Germany	38	ncbi	Assembly		blaCTX-M-15				S83L/D87N	S80I/E84		erm(B);blaCTX-M-15	2
GCA_002442395.1	45_Esco_HA-DE	Germany	38	ncbi	Assembly		blaCTX-M-15				S83L/D87N	S80I/E84		aac(6')Ib-cr;blaOXA-1;blaCTX-M-15;dfrA1;aadA1	5
GCA_002442415.1	47_Esco_HA-DE	Germany	38	ncbi	Assembly		blaCTX-M-15							strB;aadA1;blaCTX-M-15;dfrA1;sul1;sul2;mph(A);tet(A);strA	9
GCA_002463095.1	MOD1-EC6257	USA: IA	38	ncbi	Assembly									sul2	1
GCA_002463525.1	MOD1-EC6179	USA: PA	38	ncbi	Assembly										0
GCA_002546125.1	MOD1-EC5848	USA:MT	38	ncbi	Assembly									tet(B);strA;sul2;strB	4
GCA_002573205.1	11_Esco_CA-NL	Netherlands	38	ncbi	Assembly		blaCTX-M-14							strB;tet(D);sul2;blaTEM-1B;blaCTX-M-14b;catA1;strA	7
GCA_002573375.1	17_Esco_HA-NL	Netherlands	38	ncbi	Assembly		blaCTX-M-15				S83L/D87			blaCTX-M-15;aac(3)-IIa;catA1;dfrA1;aadA1;blaTEM-1B;strB;strA;sul2;tet(D)	10
GCA_002631395.1	22c_Esco_HA-NL	Netherlands	38	ncbi	Assembly		blaCTX-M-14				S83L/D87Y	S80I/E84	Redundant	strB;sul2;aac(3)-IIa;sul1;blaCTX-M-14;aadA2;strA;dfrA12;mph(A)	9
GCA_002631455.1	38_Esco_HA-DE	Germany	38	ncbi	Assembly		blaCTX-M-14				S83L/D87Y	S80I/E84		blaCTX-M-14	1
GCA_002895295.1	ICBUR15	Brazil: Sao Paulo	38	ncbi	Assembly		blaCTX-M-14				S83L/D87Y	S80I/E84		blaCTX-M-14;strB;strA;sul2	4
GCA_002895335.1	ICBUR20	Brazil: Sao Paulo	38	ncbi	Assembly		blaCTX-M-14				S83L/D87Y	S80I/E84	Redundant	strB;blaCTX-M-14;sul2;strA	4
GCA_002901285.1	REP237	Brazil: Piedade	38	ncbi	Assembly		blaCTX-M-15				S83L/D87			blaCTX-M-15;dfrA17;aac(6')Ib-cr;tet(B);aadA5;mph(A);sul1;blaOXA-1	8
GCA_002928605.1	IMT38402	Guinea	38	ncbi	Assembly		blaCTX-M-15							blaCTX-M-15;blaTEM-1B;tet(A);strB;strA;sul2;QnrS1;dfrA14	8
GCA_002946715.1	266917_2	United Kingdom	38	ncbi	Assembly	blaOXA-181	blaCTX-M-15	YRIK - A413V			S83L/D87	S80I/E84V		blaCTX-M-15;tet(A);aac(6')Ib-cr;blaOXA-1;QnrS1;dfrA1;aadA1;blaOXA-181;sul2;tet(D);blaTEM-1B;catA1;blaCMY-16	13
GCA_003000595.1	AR_0368	unknown	38	ncbi	Assembly									dfrA8;blaTEM-1B;strA;strB;sul2	5
GCA_003145595.1	Sum2013_WWKa_OUT_5	Germany: Dresden-Kaditz	38	ncbi	Assembly										0
GCA_003146455.1	Aut2013_WWKa_NEU_44	Germany: Dresden-Kaditz	38	ncbi	Assembly										0
GCA_900169595.1	E3	unknown	38	ncbi	Assembly	blaOXA-48	blaCTX-M-24				S83L/D87		Redundant	blaOXA-48;blaCTX-M-24;aac(3)-IId;sul1;blaTEM-1B;aadA5;mph(A);dfrA17	8
GCA_900169685.1	E2	unknown	38	ncbi	Assembly	blaOXA-48	blaCTX-M-24				S83L/D87			blaOXA-48;blaCTX-M-24;blaTEM-1B	3
GCA_900169775.1	E4	unknown	38	ncbi	Assembly	blaOXA-48	blaCTX-M-24				S83L/D87		Redundant	dfrA17;aac(3)-IId;blaCTX-M-24;blaTEM-1B;mph(A);blaOXA-48	6
GCA_900169875.1	E5	unknown	38	ncbi	Assembly	blaOXA-48	blaCTX-M-24				S83L/D87		Redundant	aadA5;blaOXA-48;dfrA17;blaCTX-M-24;blaTEM-1B;sul1;mph(A);aac(3)-IId	8
GCA_900169935.1	E1	unknown	38	ncbi	Assembly	blaOXA-48	blaCTX-M-24				S83L/D87			aac(3)-IId;blaCTX-M-24;blaOXA-48;blaTEM-1B;sul1;mph(A);aadA5;dfrA17	8
GCA_000981065.1	ST-44	unknown	44	ncbi	Assembly		blaCTX-M-15							dfrA17;aac(6')Ib-cr;aadA2;dfrA12;mph(A);aadA5;strA;tet(A);sul1;tet(B);sul2;blaCTX-M-15;blaOXA-1;strB	14
GCA_002012125.1	Ecol_AZ155	China: Beijing	44	ncbi	Assembly	blaKPC-2								floR;tet(A);strB;strA;sul2;blaCMY-2;tet(B);blaKPC-2;sul1	9
GCA_002190365.1	ECOR13	Sweden	44	ncbi	Assembly										0
GCA_002197975.1	ECOR13	Sweden	44	ncbi	Assembly									aac(3)-Ia	1
GCA_002922925.1	10E	Brazil: Curitiba	44	ncbi	Assembly		blaCTX-M-15							dfrA17;aadA1;aadA5;rmtD;tet(B);blaOXA-9;dfrA22;strB;blaTEM-1A;aacA4;sul1;strA;blaCTX-M-15;sul2;blaOXA-1;mph(A)	16
GCA_003008115.1	BA7132	India: Vellore	44	ncbi	Assembly	blaNDM-5	blaCTX-M-15	YRIN - E349K-I532L						sul1;aac(6')Ib-cr;tet(A);aac(3)-IIa;aadA5;mph(A);dfrA17;blaNDM-5;blaCTX-M-15;blaOXA-1;catA1	11
GCA_000017765.1	HS	unknown	46	ncbi	Assembly										0
GCA_000782795.1	blood-08-0094	USA: WA	46	ncbi	Assembly		blaCTX-M-15							blaOXA-1;aadA5;blaCTX-M-15;aac(3)-IIa;tet(A);aac(6')Ib-cr;mph(A);sul1;aadA2;dfrA17;dfrA12	11
GCA_000798535.1	CVM N36837PS	USA	46	ncbi	Assembly									strA;blaTEM-1A;tet(A);strB;floR;sul2	6
GCA_001029125.1	PCN061	unknown	46	ncbi	Assembly									sul2;strA;strB;tet(B);oqxB;oqxA;dfrA17;aac(3)-IId;floR;blaTEM-1B;aph(3')-Ia	11
GCA_001268805.1	YS river water	unknown	46	ncbi	Assembly									tet(A);QnrS1;strB;blaTEM-1B;sul3	5
GCA_001269125.1	YS river water	unknown	46	ncbi	Assembly										0
GCA_001630855.1	RCE01	Russia: Moscow	46	ncbi	Assembly									strB;tet(B);mph(A);strA;sul2;blaTEM-1B;dfrA14	7
GCA_001642285.1	PCN009	unknown	46	ncbi	Assembly									oqxB;sul2;tet(A);rmtB;strA;catA1;oqxA;strB;aac(3)-IId;qepA;aadA5;dfrA17	12
GCA_001900795.1	H2	unknown	46	ncbi	Assembly									dfrA17;aadA5;sul2;strA;strB;aac(6')Ib-cr;blaOXA-1;catB3;ARR-3;tet(A)	10
GCA_001911615.1	702251	Pakistan: Bin Qasim Town	46	ncbi	Assembly		blaCTX-M-15							blaTEM-1B;blaCTX-M-15;aadA1;dfrA1	4
GCA_001912225.1	300735	Mozambique: Manhica	46	ncbi	Assembly									sul2;strA;strB;blaTEM-1B	4
GCA_002155375.1	AUH_IMP187	Lebanon	46	ncbi	Assembly	blaOXA-48	blaCTX-M-15							blaCTX-M-15;blaTEM-1B;blaOXA-1;aac(6')Ib-cr;blaOXA-48;dfrA17;aadA5;sul1;mph(A);aac(3)-IId;tet(A)	11
GCA_002190435.1	ECOR16	USA: Washington	46	ncbi	Assembly									tet(C);strA;strB	3
GCA_002217075.1	CoR-11	China: Zhejiang	46	ncbi	Assembly		blaCTX-M-55							aac(3)-IId;QnrS1;dfrA12;oqxB;strB;aadA8b;aph(3')-Ia;strA;oqxA;sul3;blaCTX-M-55;mcr-1.1	12
GCA_002310675.1	127	United Kingdom: Scotland, Edinburgh	46	ncbi	Assembly									dfrA1;sul1;aadA5;dfrA17;aph(3')-Ia;strB;strA;sul2;catA1;blaCMY-2;blaTEM-33	11
GCA_002887535.1	GB788	China: Guangzhou, Guangdong	46	ncbi	Assembly	blaNDM-5								blaNDM-5;mcr-1.1	2
GCA_003008895.1	12f4	China:Shanghai	46	ncbi	Assembly									strB;strA;oqxB;oqxA;mcr-1.1	5
GCA_003009175.1	10f60	China:Shanghai	46	ncbi	Assembly									strB;strA;oqxB;oqxA;mcr-1.1	5
GCA_003009335.1	12b3	China:Shanghai	46	ncbi	Assembly									strB;strA;oqxB;oqxA;mcr-1.1	5
GCA_003009375.1	13j6	China:Shanghai	46	ncbi	Assembly									strB;strA;oqxB;oqxA;mcr-1.1	5
GCA_003009555.1	12c2	China:Shanghai	46	ncbi	Assembly									strB;blaTEM-1B;strA;aadA8b;dfrA12;aph(3')-Ia;oqxB;aac(3)-IVa;oqxA;mcr-1.1	10
GCA_003009635.1	12f7	China:Shanghai	46	ncbi	Assembly									strB;strA;oqxB;oqxA;mcr-1.1	5
GCA_003010055.1	13j4	China:Shanghai	46	ncbi	Assembly									strB;strA;oqxB;oqxA;mcr-1.1	5
GCA_003010155.1	13h2	China:Shanghai	46	ncbi	Assembly									strB;fosA;strA;oqxB;oqxA;mcr-1.1	6
GCA_003010165.1	12f5	China:Shanghai	46	ncbi	Assembly									oqxB;strB;strA;oqxA;mcr-1.1	5
GCA_003010245.1	13b2	China:Shanghai	46	ncbi	Assembly									mcr-1.1	1
GCA_003145695.1	Sum2013_WWKa_ALT_27	Germany: Dresden-Kaditz	46	ncbi	Assembly									QnrS1;blaTEM-1B	2
GCA_003203315.1	MH16-401M	vietnam:Hanoi	46	ncbi	Assembly		blaCTX-M-55							blaCTX-M-55;tet(A);floR;aph(3')-Ia;sul2;dfrA14;strA;strB;catA2;blaTEM-1B;aac(3)-IIa;mcr-1.1	12
GCA_000190815.1	E1520	unknown	48	ncbi	Assembly									tet(A)	1
GCA_000210475.1	ETEC H10407	unknown	48	ncbi	Assembly								Redundant		0
GCA_000617045.2	410259	USA	48	ncbi	Assembly									tet(B)	1
GCA_000700225.1	3-373-03_S3_C1	Tanzania	48	ncbi	Assembly										0
GCA_000770255.1	2013EL-1320-c5	unknown	48	ncbi	Assembly						S83L/D87		Redundant		0
GCA_000773435.1	2013EL-1319	unknown	48	ncbi	Assembly						S83L/D87				0
GCA_000778635.1	upec-22	USA: WA	48	ncbi	Assembly				deletion	deletion				catA1	1
GCA_000798095.1	CVM N36312PS	USA	48	ncbi	Assembly									sul1;dfrA12;tet(A);blaCMY-2;aadA2;QnrB49	6
GCA_000987875.1	SEC470	unknown	48	ncbi	Assembly								reference		0
GCA_001576075.1	G299	United Kingdom: Scotland	48	ncbi	Assembly									dfrA5;tet(A);aph(3')-Ia;sul2;sul1;aadA1;blaOXA-1;floR	8
GCA_001614805.1	swine1	China:Jilin	48	ncbi	Assembly				recombined; 3	frameshift	S83L/D87	S80I/E84		ARR-3;aph(3')-IIa;oqxB;strA;aph(3')-Ia;cmlA1;floR;tet(A);blaOXA-10;oqxA;aadA1;fosA;dfrA14;strB	14
GCA_001616715.1	sheep29	China:Qinghai	48	ncbi	Assembly						S83L/D87N	S80I/E84		dfrA12;sul2;oqxB;mph(A);aph(3')-IIa;blaTEM-1B;oqxA;fosA;floR;rmtB;tet(A);sul1;strB;aadA2;strA	15
GCA_001616935.1	sheep40	China:Qinghai	48	ncbi	Assembly									QnrS1;tet(A)	2
GCA_001703435.1	LV13072	Portugal	48	ncbi	Assembly		blaCTX-M-1		recombined (not phylogroup D); 2		S83L/D87N	S80R/E84		strA;blaCTX-M-1;blaTEM-1B;tet(A);sul2;dfrA14;strB	7
GCA_001867205.1	WCHEC1613	China: Chengdu	48	ncbi	Assembly		blaCTX-M-14		recombined; 3	-91; G->A (OmpR F1)				mph(A);fosA;oqxB;sul1;blaTEM-1B;dfrA14;aadA1;blaCTX-M-14;cmlA1;oqxA;aac(3)-IVa;sul3;sul2;aadA2;QnrS1;dfrA12;strA;strB;mcr-1.1	19
GCA_001892765.1	508	China: Shandong	48	ncbi	Assembly	blaNDM-9	blaCTX-M-65	YRIN - E349K-I532L	recombined; 3		S83L/D87N	S80I/E84		tet(A);floR;aph(4)-Ia;ARR-3;blaOXA-1;cmlA1;aac(6')Ib-cr;blaNDM-9;aac(3)-IVa;mph(A);fosA;sul2;strA;strB;aph(3')-Ic;sul1;dfrA12;catB3;blaCTX-M-65	19
GCA_001892935.1	652	China: Shandong	48	ncbi	Assembly	blaNDM-9	blaCTX-M-65	YRIN - E349K-I532L	recombined; 3		S83L/D87N	S80I/E84	Redundant	cmlA1;floR;aph(4)-Ia;aadA1;tet(A);catB3;fosA;sul2;ARR-3;aac(3)-IVa;sul1;strA;strB;blaCTX-M-65;aph(3')-Ic;blaNDM-9;dfrA12;aac(6')Ib-cr;blaOXA-1;mph(A)	20
GCA_001893245.1	686	China: Shandong	48	ncbi	Assembly	blaNDM-5	blaCTX-M-65	YRIN - E349K-I532L	recombined; 3		S83L/D87N	S80I/E84		catA1;oqxB;sul1;fosA;mph(A);oqxA;blaCTX-M-65;aadA2;cmlA1;blaNDM-5;aph(4)-Ia;aadA1;sul2;aac(3)-IVa;aac(6')Ib-cr;catB3;sul3;ARR-3;blaOXA-1;floR	20
GCA_001893365.1	492	China: Shandong	48	ncbi	Assembly	blaNDM-9	blaCTX-M-123		recombined; 3		S83L/D87N	S80I/E84		aph(3')-Ia;sul2;blaTEM-1B;oqxB;aph(3')-IIa;mph(A);fosA;sul1;blaNDM-9;blaCTX-M-123;aadA2;oqxA;rmtB;floR;dfrA12;tet(A);strB;strA;mcr-1.1	19
GCA_001893475.1	633	China: Shandong	48	ncbi	Assembly	blaNDM-5			recombined; 3		S83L/D87N	S80I/E84		dfrA12;sul1;dfrA17;mph(A);blaNDM-5;tet(A);blaCMY-2;aadA5	8
GCA_001893545.1	658	China: Shandong	48	ncbi	Assembly	blaNDM-9	blaCTX-M-55		recombined; 3		S83L/D87N	S80I/E84		blaCTX-M-55;blaOXA-1;dfrA17;rmtB;aadA2;floR;catB3;blaNDM-9;tet(A);sul1;cmlA1;ARR-3;mph(A);sul2;fosA;aadA1;aac(6')Ib-cr;strA;aph(4)-Ia;sul3;aac(3)-IVa;aadA5;strB	23
GCA_001894545.1	566	China: Shandong	48	ncbi	Assembly	blaNDM-5	blaCTX-M-55		recombined; 3		S83L/D87N	S80I/E84		fosA;sul1;aadA2;dfrA12;blaNDM-5;aadA5;blaCTX-M-55;dfrA17;aph(3')-IIa;tet(A);mph(A)	11
GCA_001901365.1	S30	unknown	48	ncbi	Assembly				recombined (not phylogroup D); 1		S83L/D87N	S80I/E84		fosA;oqxB;mph(A);tet(A);strB;strA;sul2;aac(3)-IId;blaTEM-1B;tet(A);oqxA;strA;strB;aph(3')-Ic;strB;strA;sul2;dfrA12;aadA2	13
GCA_001969285.3	WCHEC050613	China: Sichuan: Chengdu	48	ncbi	Assembly		blaCTX-M-14		recombined; 3	-91; G->A (OmpR F1)			Redundant	mph(A);blaCTX-M-14;fosA;aac(3)-IVa;sul2;dfrA12;aadA2;cmlA1;aadA1;sul3;sul1;oqxA;oqxB;blaTEM-1B;QnrS1;strB;strA;sul2;dfrA14;mcr-1.1	19
GCA_002002195.1	14.2-R3	Australia: Sydney	48	ncbi	Assembly									dfrA17;aadA5;sul2;tet(A)	4
GCA_002002235.1	1.9-R7	Australia: Sydney	48	ncbi	Assembly									QnrS1;tet(A);blaTEM-1B	3
GCA_002134265.1	OLC1071	Canada	48	ncbi	Assembly								Redundant		0
GCA_002154755.1	SJRP/Ec42687	Brazil: Guapiacu	48	ncbi	Assembly		blaCTX-M-2		frameshift					tet(B);aac(3)-VIa;aadA1;sul2;blaCTX-M-2;sul1	6
GCA_002155445.1	AUH_IMP203	Lebanon	48	ncbi	Assembly		blaCTX-M-15		frameshift	frameshift				QnrS1;blaCTX-M-15;blaTEM-1B;tet(A);strB;strA;sul2;dfrA14	8
GCA_002190465.1	ECOR18	USA: Washington	48	ncbi	Assembly									sul2	1
GCA_002190475.1	ECOR19	USA: Washington	48	ncbi	Assembly									tet(A);sul2;strA;strB	4
GCA_002190515.1	ECOR20	Indonesia: Bali	48	ncbi	Assembly										0
GCA_002190545.1	ECOR21	Indonesia: Bali	48	ncbi	Assembly								Redundant		0
GCA_002207265.1	E956	Egypt	48	ncbi	Assembly								Redundant	blaTEM-1B;sul2;sul1;dfrA7;strA;strB	6
GCA_002207725.1	E949	Egypt	48	ncbi	Assembly									strB;blaTEM-1B;sul2;sul1;dfrA7;strA	6
GCA_002232635.1	MOD1-EC5078	USA:NY	48	ncbi	Assembly								Redundant		0
GCA_002232955.1	MOD1-EC5081	USA:NY	48	ncbi	Assembly										0
GCA_002232995.1	MOD1-EC5079	USA:NY	48	ncbi	Assembly								Redundant		0
GCA_002243815.1	53-844	USA: Seattle	48	ncbi	Assembly										0
GCA_002243845.1	53-936	USA: Seattle	48	ncbi	Assembly								Redundant		0
GCA_002456245.1	MOD1-EC910	Mexico	48	ncbi	Assembly				recombined; 3					strB;tet(A)	2
GCA_002456775.1	MOD1-EC564	unknown	48	ncbi	Assembly								Redundant	sul2	1
GCA_002461145.1	MOD1-EC1552	Guinea-Bissau	48	ncbi	Assembly								Redundant		0
GCA_002466355.1	MOD1-EC320	USA: MD	48	ncbi	Assembly								Redundant		0
GCA_002466695.1	MOD1-EC105	USA	48	ncbi	Assembly								Redundant	sul2	1
GCA_002511265.1	MOD1-EC6345	USA: TX	48	ncbi	Assembly									strB;strA;tet(B)	3
GCA_002516065.1	MOD1-EC3803	USA: KS	48	ncbi	Assembly										0
GCA_002516125.1	MOD1-EC3800	USA: KS	48	ncbi	Assembly										0
GCA_002517975.1	MOD1-EC5788	USA: PA	48	ncbi	Assembly									sul2;tet(B);aph(3')-Ic;strB;strA	5
GCA_002521475.1	MOD1-EC6712	USA: FL	48	ncbi	Assembly										0
GCA_002534705.1	MOD1-EC5934	USA:NE	48	ncbi	Assembly								Redundant	tet(B)	1
GCA_002539225.1	MOD1-EC5955	USA:DC	48	ncbi	Assembly									tet(B)	1
GCA_002549285.1	MOD1-EC5797	USA:NY	48	ncbi	Assembly									strB;strA;tet(B)	3
GCA_002549725.1	MOD1-EC5787	USA:PA	48	ncbi	Assembly									sul2;tet(B);aph(3')-Ic;strB;strA	5
GCA_002741215.1	90-9272	Bangladesh	48	ncbi	Assembly					frameshift					0
GCA_002812545.1	SC516	China: Sichuan	48	ncbi	Assembly				recombined; 3		S83L/D87N	S80I/E84			0
GCA_002848325.1	L12	Denmark	48	ncbi	Assembly										0
GCA_002917395.1	132	Ecuador: Quito	48	ncbi	Assembly				recombined (not phylogroup D); 1					blaTEM-1B;tet(B);mef(B);QnrB19;sul3;strB;tet(A);dfrA14;aadA1;sul2;cmlA1;aadA2;dfrA12;strA	14
GCA_002941325.1	YH17173	China: Anhui	48	ncbi	Assembly		blaCTX-M-55		recombined; 3		S83L/D87N	S80I/E84		mph(A);dfrA12;aph(3')-IIa;sul2;blaOXA-10;oqxA;dfrA14;cmlA1;aadA2;floR;ARR-2;blaCTX-M-55;aac(3)-IIa;tet(A);mcr-1.1	15
GCA_002941345.1	YH17171	China: Guangdong	48	ncbi	Assembly		blaCTX-M-14		recombined (not phylogroup D); 1		S83L/D87N	S80I/E84		floR;tet(A);fosA;tet(M);sul3;blaCTX-M-14;mph(A);oqxA;aadA1;cmlA1;sul2;aadA2;aac(3)-IVa;blaCARB-2;dfrA16;mcr-1.1	16
GCA_002941985.1	YH17135	China: Anhui	48	ncbi	Assembly						S83K/D87			blaTEM-1A;dfrA14;sul2;strA;strB;floR;tet(A);mcr-1.1	8
GCA_002942625.1	LN_F1_1	China: Liaoning	48	ncbi	Assembly		blaCTX-M-14							strA;QnrS1;blaCTX-M-14;dfrA14;fosA;QnrS2;dfrA17;sul2;strB;floR;tet(A);aadA5	12
GCA_002991625.1	SC425	China	48	ncbi	Assembly				recombined; 3					strB;blaTEM-1B;strA;mcr-1.1	4
GCA_002991655.1	SC413	China	48	ncbi	Assembly									tet(B);floR;sul3;blaTEM-1B;mph(A);aadA2;erm(B);dfrA12;mcr-1.1	9
GCA_003008835.1	sc14-186	China:Sichuan	48	ncbi	Assembly						S83L/D87N	S80I/E84		sul2;dfrA14;strB;tet(A)	4
GCA_003008975.1	sc13-121	China:Sichuan	48	ncbi	Assembly				recombined; 3					strB;blaTEM-1B;strA;sul2;tet(A);QnrS1	6
GCA_003009675.1	11c5	China:Chongqing	48	ncbi	Assembly						S83L/D87			dfrA1;aadB;aph(3')-XV;catB3;blaOXA-4;tet(A);mcr-1.1	7
GCA_003010285.1	ZZ1-5g	China:Shandong	48	ncbi	Assembly		blaCTX-M-64				S83L/D87N	S80I/E84		dfrA12;sul2;oqxB;aph(3')-IIa;mph(A);blaTEM-1B;oqxA;floR;fosA;rmtB;blaCTX-M-64;tet(A);sul1;strB;aadA2;strA;mcr-1.1	17
GCA_003013205.1	RM14721	unknown	48	ncbi	Assembly										0
GCA_003146595.1	Win2012_WWKa_OUT_19	Germany: Dresden-Kaditz	48	ncbi	Assembly									blaTEM-1B;blaTEM-1B;blaTEM-1B;blaTEM-1B;tet(A)	2
GCA_003172065.1	WCHEC050613C1G0	China: Chengdu	48	ncbi	Assembly		blaCTX-M-14		recombined; 3	-91; G->A (OmpR F1)			Redundant	strB;strA;oqxB;sul1;blaTEM-1B;dfrA14;cmlA1;sul2;fosA;aadA1;oqxA;aac(3)-IVa;QnrS1;sul3;dfrA12;blaCTX-M-14;mph(A);aadA2;mcr-1.1	19
GCA_003172085.1	WCHEC050613C2G0	China: Chengdu	48	ncbi	Assembly		blaCTX-M-14		recombined; 3	-91; G->A (OmpR F1)			Redundant	strB;strA;oqxB;blaTEM-1B;dfrA14;cmlA1;sul2;fosA;aadA1;oqxA;sul1;aac(3)-IVa;QnrS1;sul3;dfrA12;blaCTX-M-14;mph(A);aadA2;mcr-1.1	19
GCA_003172335.1	WCHEC050613C2G1000M9	China: Chengdu	48	ncbi	Assembly		blaCTX-M-14		recombined; 3	-91; G->A (OmpR F1)			Redundant	sul3;oqxB;sul1;blaCTX-M-14;oqxA;sul2;mph(A);fosA;dfrA12;aadA2;cmlA1;aadA1;aac(3)-IVa;mcr-1.1	14
GCA_003172355.1	WCHEC050613C2G1000	China: Chengdu	48	ncbi	Assembly				recombined; 3	-91; G->A (OmpR F1)			Redundant	blaTEM-1B;strA;strB;dfrA14;sul2;mph(A);QnrS1;mcr-1.1	8
GCA_003172375.1	WCHEC050613C1G1000M9	China: Chengdu	48	ncbi	Assembly		blaCTX-M-14		recombined; 3	-91; G->A (OmpR F1)			Redundant	sul3;fosA;oqxB;sul2;oqxA;sul1;dfrA12;aadA2;blaCTX-M-14;mph(A);cmlA1;aadA1;aac(3)-IVa;mcr-1.1	14
GCA_003172385.1	WCHEC050613C1G1000	China: Chengdu	48	ncbi	Assembly		blaCTX-M-14		recombined; 3	-91; G->A (OmpR F1)			Redundant	blaTEM-1B;oqxB;cmlA1;strA;mph(A);aadA1;sul2;fosA;oqxA;sul1;aac(3)-IVa;sul3;QnrS1;dfrA12;blaCTX-M-14;strB;dfrA14;aadA2;mcr-1.1	19
GCA_003172405.1	WCHEC050613C1G0M9	China: Chengdu	48	ncbi	Assembly		blaCTX-M-14		recombined; 3	-91; G->A (OmpR F1)			Redundant	fosA;oqxB;sul2;aadA1;mph(A);cmlA1;oqxA;sul3;sul1;aadA2;dfrA12;blaCTX-M-14;aac(3)-IVa;mcr-1.1	14
GCA_900093865.1	CT37C.A1	vietnam	48	ncbi	Assembly				recombined (not phylogroup D); 1		S83L/D87			strA;sul3;aph(3')-Ia;sul2;floR;dfrA14;blaTEM-1B;aadA1;strB;cmlA1;tet(A);aadA2;mcr-1.1	13
GCA_900094025.1	MT56C.G2	vietnam	48	ncbi	Assembly									blaTEM-1C;tet(A);aph(4)-Ia;aadA1;QnrS1;aac(3)-IVa;dfrA5;aph(3')-Ic;sul1;sul3;tet(M);floR;mcr-1.1	13
GCA_900195745.1	F2_1	Australia	48	ncbi	Assembly				recombined (not phylogroup D); 1					tet(A);aph(3')-Ia;sul3;aadA1;blaTEM-1B;cmlA1;aadA2;dfrA12	8
GCA_900195805.1	F2_10	Australia	48	ncbi	Assembly				recombined (not phylogroup D); 1				Redundant	tet(A);aph(3')-Ia;sul3;aadA1;blaTEM-1B;cmlA1;strA;aadA2;dfrA12	9
GCA_900195945.1	F2_24	Australia	48	ncbi	Assembly				recombined (not phylogroup D); 1				Redundant	tet(A);aph(3')-Ia;sul3;blaTEM-1B;aadA1;cmlA1;aadA2;dfrA12	8
GCA_900196365.1	F2_70	Australia	48	ncbi	Assembly								Redundant	dfrA12;oqxB;aph(3')-IIa;strA;sul3;oqxA;aadA1;tet(A);strB;aph(3')-Ic;cmlA1;blaTEM-1B;aadA2;sul1	14
GCA_900196385.1	F2_71	Australia	48	ncbi	Assembly								Redundant	cmlA1;dfrA12;sul1;blaTEM-1B;oqxB;aph(3')-IIa;sul3;oqxA;tet(A);strB;aph(3')-Ic;strA;aadA1;aadA2	14
GCA_900196455.1	F2_72	Australia	48	ncbi	Assembly									tet(B);strB;sul2;aph(3')-Ia;dfrA5;blaTEM-1B;strA	7
GCA_900196515.1	F2_94	Australia	48	ncbi	Assembly									aph(4)-Ia;aac(3)-IVa;tet(A)	3
GCA_900199255.1	F2_69	Australia	48	ncbi	Assembly									dfrA12;oqxB;aadA1;sul3;oqxA;tet(A);cmlA1;strB;strA;blaTEM-1B;aph(3')-Ic;aph(3')-IIa;aadA2;sul1	14
GCA_000176635.2	TA271	unknown	58	ncbi	Assembly										0
GCA_000194255.1	95.0941	unknown	58	ncbi	Assembly									blaTEM-1B;tet(B);strA;strB	4
GCA_000194295.2	97.0264	unknown	58	ncbi	Assembly									tet(B);sul2;aph(3')-Ic;strB;strA;aadA1;dfrA1	7
GCA_000215285.2	3.3884	unknown	58	ncbi	Assembly										0
GCA_000261385.1	B799	unknown	58	ncbi	Assembly										0
GCA_000352605.1	KTE136	Denmark	58	ncbi	Assembly									dfrA7;sul2;strA;strB;tet(A)	5
GCA_000356425.2	MP021561.3	unknown	58	ncbi	Assembly										0
GCA_000357165.1	P0299917.10	unknown	58	ncbi	Assembly										0
GCA_000357185.2	P0299917.2	unknown	58	ncbi	Assembly										0
GCA_000357205.2	P0299917.3	unknown	58	ncbi	Assembly										0
GCA_000357305.2	P0299917.4	unknown	58	ncbi	Assembly										0
GCA_000357325.1	P0299917.5	unknown	58	ncbi	Assembly										0
GCA_000357345.2	P0299917.6	unknown	58	ncbi	Assembly										0
GCA_000357365.2	P0299917.7	unknown	58	ncbi	Assembly										0
GCA_000357505.2	P0299917.9	unknown	58	ncbi	Assembly										0
GCA_000358795.2	P0299917.8	unknown	58	ncbi	Assembly										0
GCA_000459655.1	KOEGE 33 (68a)	Denmark	58	ncbi	Assembly									strB;blaTEM-1C;strA;sul2;dfrA5;strB;blaTEM-1B	6
GCA_000488595.1	908541	unknown	58	ncbi	Assembly									dfrA5;strB;blaTEM-1B;sul2	4
GCA_000503275.1	1365	unknown	58	ncbi	Assembly		blaCTX-M-1							aadA1;dfrA5;dfrA1;blaCTX-M-1;blaTEM-1B;sul1;strB;tet(A);strA	9
GCA_000503295.1	38.16	unknown	58	ncbi	Assembly		blaCTX-M-1							tet(B);dfrA1;sul2;blaCTX-M-1;strB;aadA1;blaTEM-1B;strA;sul1	9
GCA_000503695.1	1240	unknown	58	ncbi	Assembly		blaCTX-M-1							strA;tet(B);strB;sul2;blaCTX-M-1;tet(A);sul1;blaTEM-1B;aadA1;dfrA1	10
GCA_000503715.1	1350	unknown	58	ncbi	Assembly		blaCTX-M-1							sul2;aadA1;aph(3')-Ia;dfrA5;dfrA1;blaCTX-M-1;blaTEM-1B;sul1;strB;strA	10
GCA_000780355.1	upec-151	USA: WA	58	ncbi	Assembly									tet(A);blaTEM-1B;strA;sul2;dfrA5;strB;aph(3')-Ia	7
GCA_000785325.1	upec-203	USA: WA	58	ncbi	Assembly									mph(A);aph(3')-Ia;sul2;tet(B);dfrA17;blaTEM-1B;aadA5;blaTEM-1B;sul1;catA1;strB;strA	11
GCA_000797755.1	CVM N33443PS	USA	58	ncbi	Assembly									strB;tet(B);sul2;floR;strA	5
GCA_000798075.1	CVM N33849PS	USA	58	ncbi	Assembly									strA;floR;sul2;tet(A);strB	5
GCA_000798435.1	CVM N33719PS	USA	58	ncbi	Assembly									blaCMY-2;tet(A);floR;strB;strA;sul2;blaTEM-1A	7
GCA_000818995.1	CVM N34152PS	USA	58	ncbi	Assembly									tet(A);floR;strB;sul2;tet(M);strA	6
GCA_000819185.1	CVM N36113PS	USA	58	ncbi	Assembly									tet(A);strB;strA;floR;sul2;blaTEM-1A	6
GCA_000832005.1	E24377A	India: Jawhar	58	ncbi	Assembly									tet(A);sul2;strB;dfrA5;blaTEM-1B;strA	6
GCA_001030545.1	BIDMC103	unknown	58	ncbi	Assembly									blaTEM-1B;QnrS1;dfrA14;sul2;blaTEM-1B;mph(A)	5
GCA_001191345.1	CFSAN026795	USA	58	ncbi	Assembly										0
GCA_001262895.1	CFSAN026807	USA	58	ncbi	Assembly										0
GCA_001262935.1	CFSAN026808	USA	58	ncbi	Assembly										0
GCA_001268325.1	YS river water	unknown	58	ncbi	Assembly										0
GCA_001420065.1	304	Tanzania	58	ncbi	Assembly									blaTEM-1A;aadA1	2
GCA_001441345.1	K71	Israel	58	ncbi	Assembly										0
GCA_001519445.1	GN02055	USA	58	ncbi	Assembly									aph(4)-Ia;aac(3)-IVa;sul2;blaCMY-2;strB;floR;tet(A);blaTEM-1B;strA;dfrA1	10
GCA_001521695.1	GN03624	USA	58	ncbi	Assembly									tet(A);aadA1;sul1;blaHERA-3;aac(3)-VIa	5
GCA_001561575.1	B87	United Kingdom	58	ncbi	Assembly									strA;tet(A);strB;blaTEM-1C	4
GCA_001571665.1	CD3	Canada: Winnipeg	58	ncbi	Assembly									blaTEM-1A	1
GCA_001614555.1	sheep13	China:Qinghai	58	ncbi	Assembly										0
GCA_001615325.1	sheep3	China:Qinghai	58	ncbi	Assembly									tet(B);blaTEM-1B	2
GCA_001615955.1	swine44	China:Jiangsu	58	ncbi	Assembly		blaCTX-M-65							blaTEM-1C;aac(3)-IId;QnrS1;strB;sul3;aph(3')-Ia;tet(A);floR;rmtB;blaCTX-M-65;fosA;sul2;strA	13
GCA_001616435.1	sheep15	China:Qinghai	58	ncbi	Assembly										0
GCA_001616855.1	sheep36	China:Qinghai	58	ncbi	Assembly									tet(B);blaTEM-1B	2
GCA_001617015.1	sheep43	China:Qinghai	58	ncbi	Assembly										0
GCA_001617025.1	sheep45	China:Qinghai	58	ncbi	Assembly									tet(B);blaTEM-1B	2
GCA_001748885.1	AF7658-2	Israel	58	ncbi	Assembly										0
GCA_001748995.1	ca285-S9	Israel	58	ncbi	Assembly										0
GCA_001749055.1	K2026	Israel	58	ncbi	Assembly										0
GCA_001749065.1	K2328	Israel	58	ncbi	Assembly									aadA2;cmlA1;aadA1;sul3;tet(A)	5
GCA_001749235.1	K6412	Israel	58	ncbi	Assembly									sul3;aadA1;cmlA1;tet(A);aadA2	5
GCA_001749325.1	VL118	Israel	58	ncbi	Assembly										0
GCA_001749455.1	VL2507-1	Israel	58	ncbi	Assembly										0
GCA_001894645.1	718	China: Shandong	58	ncbi	Assembly		blaCTX-M-123							blaCTX-M-123;QnrS2;dfrA14	3
GCA_001900675.1	D5	unknown	58	ncbi	Assembly		blaCTX-M-65							sul2;aph(4)-Ia;aac(3)-IVa;dfrA17;blaCTX-M-65;tet(A);sul1;floR	8
GCA_001912705.1	503688	India:Kolkata	58	ncbi	Assembly									QnrS1;blaTEM-1B;strB;strA;sul2;dfrA14	6
GCA_002006865.1	BG1	France	58	ncbi	Assembly										0
GCA_002152015.1	BWH69	USA: Massachusetts, Boston	58	ncbi	Assembly									sul3;aadA1;cmlA1;aadA2;dfrA12;tet(A);floR	7
GCA_002190785.1	ECOR34	USA: Massachusetts	58	ncbi	Assembly									aadA1;sul1	2
GCA_002193275.1	5949	Canada	58	ncbi	Assembly		blaCTX-M-15							sul2;blaCTX-M-15;blaTEM-1B;strA;strB;tet(A);floR	7
GCA_002193375.1	5951	Canada	58	ncbi	Assembly		blaCTX-M-15							sul2;blaCTX-M-15;strA;blaTEM-1B;strB;tet(A);floR	7
GCA_002225565.1	MOD1-EC5748	USA:TN	58	ncbi	Assembly										0
GCA_002225765.1	MOD1-EC5742	USA:PA	58	ncbi	Assembly									blaTEM-1B;sul2;tet(B);aph(3')-Ic;strB;strA	6
GCA_002226025.1	MOD1-EC5705	USA:CO	58	ncbi	Assembly										0
GCA_002226275.1	MOD1-EC5714	USA:CO	58	ncbi	Assembly										0
GCA_002226325.1	MOD1-EC5712	USA:CO	58	ncbi	Assembly										0
GCA_002227275.1	MOD1-EC5661	USA:CO	58	ncbi	Assembly										0
GCA_002228935.1	MOD1-EC5526	USA:CO	58	ncbi	Assembly									strA;strB;tet(B);blaTEM-1B	4
GCA_002231805.1	MOD1-EC5179	USA:NY	58	ncbi	Assembly										0
GCA_002232555.1	MOD1-EC5025	USA:PA	58	ncbi	Assembly									strA;strB;tet(C)	3
GCA_002233375.1	MOD1-EC5032	USA:PA	58	ncbi	Assembly									tet(C)	1
GCA_002244475.1	31-678	USA: Seattle	58	ncbi	Assembly										0
GCA_002442085.1	31_Esco_HA-NL	Netherlands	58	ncbi	Assembly		blaCTX-M-14							sul1;blaTEM-1B;sul2;blaOXA-1;floR;blaCTX-M-14;aadA1	7
GCA_002442235.1	36_Esco_HA-NL	Netherlands	58	ncbi	Assembly		blaCTX-M-1							dfrA17;blaCTX-M-1;sul2;aadA5;dfrA5;blaTEM-1B;strB;strA	8
GCA_002460005.1	MOD1-EC1659	USA: OH	58	ncbi	Assembly										0
GCA_002460245.1	MOD1-EC1634	Canada	58	ncbi	Assembly										0
GCA_002460855.1	MOD1-EC1626	Germany	58	ncbi	Assembly										0
GCA_002462215.1	MOD1-EC1384	USA: SD	58	ncbi	Assembly										0
GCA_002462355.1	MOD1-EC5207	USA: PA	58	ncbi	Assembly									tet(C);blaOXA-2;aadA1;blaOXA-2	3
GCA_002463135.1	MOD1-EC6252	USA: IA	58	ncbi	Assembly									sul2;blaTEM-1B;aph(3')-Ic;tet(B);strB;strA	6
GCA_002463505.1	MOD1-EC6182	USA: TN	58	ncbi	Assembly									sul2;tet(A);dfrA5;blaTEM-1B;strB;strA	6
GCA_002463615.1	MOD1-EC6089	USA: NY	58	ncbi	Assembly									strA;strB;tet(A)	3
GCA_002463795.1	MOD1-EC5546	USA: CO	58	ncbi	Assembly									tet(C)	1
GCA_002467275.1	MOD1-EC6916	USA: PA	58	ncbi	Assembly										0
GCA_002473495.1	MOD1-EC5811	USA:PA	58	ncbi	Assembly									tet(A);strB;strA;blaTEM-1B	4
GCA_002474955.1	MOD1-EC5159	USA: NY	58	ncbi	Assembly										0
GCA_002474975.1	MOD1-EC5156	USA: NY	58	ncbi	Assembly										0
GCA_002475455.1	MOD1-EC5033	USA: PA	58	ncbi	Assembly									sul2;tet(B)	2
GCA_002484975.1	MOD1-EC6647	Saudi Arabia	58	ncbi	Assembly									tet(B)	1
GCA_002485825.1	MOD1-EC6462	USA: AK	58	ncbi	Assembly									tet(B);sul2;strB;strA	4
GCA_002485875.1	MOD1-EC6459	USA: NE	58	ncbi	Assembly									aph(4)-Ia;tet(B);aac(3)-IVa;strA;strB;blaTEM-1B	6
GCA_002486995.1	MOD1-EC6302	USA: PA	58	ncbi	Assembly									sul2;tet(B);aph(3')-Ic;strB;strA	5
GCA_002487195.1	MOD1-EC6245	USA: PA	58	ncbi	Assembly									strB;tet(B);strA	3
GCA_002510405.1	MOD1-EC6539	USA: PA	58	ncbi	Assembly									tet(C);sul1;sul2;strA;tet(B);strB;aadA1;aac(3)-VIa	8
GCA_002511415.1	MOD1-EC6324	USA: IA	58	ncbi	Assembly										0
GCA_002512685.1	MOD1-EC6334	USA: MI	58	ncbi	Assembly										0
GCA_002512835.1	MOD1-EC6266	USA	58	ncbi	Assembly										0
GCA_002512995.1	MOD1-EC6547	USA: PA	58	ncbi	Assembly									sul1;tet(A);aadA1;aac(3)-VIa	4
GCA_002513945.1	MOD1-EC6368	USA: TX	58	ncbi	Assembly									sul2;strA;tet(B);strB;aph(3')-Ic	5
GCA_002514355.1	MOD1-EC5980	USA: PA	58	ncbi	Assembly									tet(B);blaTEM-1B;aadA1;catA1;sul1	5
GCA_002516075.1	MOD1-EC3802	USA: KS	58	ncbi	Assembly										0
GCA_002516825.1	MOD1-EC5158	USA: NY	58	ncbi	Assembly										0
GCA_002516905.1	MOD1-EC5150	USA: NY	58	ncbi	Assembly										0
GCA_002517965.1	MOD1-EC5799	USA: PA	58	ncbi	Assembly									aph(6)-Ic;strB;strA;tet(B);sul2;aph(3')-IIa	6
GCA_002518165.1	MOD1-EC5770	USA: PA	58	ncbi	Assembly										0
GCA_002518645.1	MOD1-EC6985	USA: CO	58	ncbi	Assembly										0
GCA_002519405.1	MOD1-EC6943	USA: PA	58	ncbi	Assembly									sul2;aadA1;dfrA5;aph(3')-Ia;dfrA1;tet(A);blaTEM-1B;sul1;strB;strA	10
GCA_002520055.1	MOD1-EC6880	USA: MI	58	ncbi	Assembly										0
GCA_002520075.1	MOD1-EC6878	USA: MI	58	ncbi	Assembly										0
GCA_002520255.1	MOD1-EC6870	USA: PA	58	ncbi	Assembly									aph(3')-Ic;strA;sul2;strB;tet(A)	5
GCA_002520565.1	MOD1-EC6851	USA: CA	58	ncbi	Assembly									strB;strA;tet(A)	3
GCA_002520595.1	MOD1-EC6849	USA: CA	58	ncbi	Assembly									tet(A);strA;strB	3
GCA_002520605.1	MOD1-EC6848	USA: CA	58	ncbi	Assembly										0
GCA_002520835.1	MOD1-EC6833	USA: MI	58	ncbi	Assembly										0
GCA_002522645.1	MOD1-EC6698	USA: MA	58	ncbi	Assembly									strA;mph(A);sul2;dfrA12;aadA2;sul1;strB;tet(B)	8
GCA_002522705.1	MOD1-EC6693	USA: MA	58	ncbi	Assembly									blaTEM-207;strB;sul2;aph(3')-Ic;tet(B);strA	6
GCA_002535775.1	MOD1-EC6180	USA:CO	58	ncbi	Assembly									tet(A);aac(3)-VIa;aadA1;sul1	4
GCA_002543485.1	MOD1-EC5994	USA:NY	58	ncbi	Assembly										0
GCA_002545485.1	MOD1-EC5881	USA:PA	58	ncbi	Assembly										0
GCA_002546185.1	MOD1-EC5841	USA:PA	58	ncbi	Assembly										0
GCA_002546805.1	MOD1-EC6193	USA:NM	58	ncbi	Assembly									strB;tet(A);floR;aph(3')-Ic;strA;sul2	6
GCA_002547375.1	MOD1-EC5900	USA:NY	58	ncbi	Assembly									aph(3')-IIa;tet(B);aph(6)-Ic	3
GCA_002573325.1	16_Esco_HA-NL	Netherlands	58	ncbi	Assembly		blaCTX-M-15							blaTEM-1B;blaCTX-M-15;aac(6')Ib-cr;blaOXA-1	4
GCA_002573445.1	20b_Esco_HA-NL	Netherlands	58	ncbi	Assembly		blaCTX-M-1							blaCTX-M-1;dfrA17;aadA5;sul2	4
GCA_002741455.1	90-9281	Bangladesh	58	ncbi	Assembly										0
GCA_002796915.1	15-AB01393	Germany	58	ncbi	Assembly		blaCTX-M-1							strB;sul2;mph(A);blaCTX-M-1;strA	5
GCA_002855735.1	Ec-HUCA 2	Spain: Oviedo	58	ncbi	Assembly	blaOXA-48	blaCTX-M-15							dfrA5;blaOXA-48;tet(A);mph(A);aac(6')Ib-cr;blaCTX-M-15;sul2;sul1;aph(3')-Ia;aadA2;dfrA12;blaTEM-1B;blaOXA-1;strA;strB	15
GCA_002906315.1	ECEST9	Brazil: Sergipe	58	ncbi	Assembly		blaCTX-M-8							blaTEM-1B;blaCTX-M-8;QnrS1;dfrA5;mcr-1.1	5
GCA_002943145.1	SWEC1124	Canada: Alberta	58	ncbi	Assembly									tet(A)	1
GCA_002943185.1	SWECR0124	Canada: Alberta	58	ncbi	Assembly		blaCTX-M-15							tet(C);blaCTX-M-15;blaTEM-1B	3
GCA_002943225.1	CowEC377	Canada: Alberta	58	ncbi	Assembly									strA;sul2;strB;tet(A);floR	5
GCA_002943305.1	CowEC013	Canada: Alberta	58	ncbi	Assembly									strA;sul2;strB;tet(A);floR	5
GCA_002943345.1	SWECR0018	Canada: Alberta	58	ncbi	Assembly									tet(A)	1
GCA_002949295.1	CowEC636	Canada: Alberta	58	ncbi	Assembly		blaCTX-M-55							strA;tet(A);sul2;dfrA17;aadA5;blaCTX-M-55;strB;floR	8
GCA_002971315.1	HT2012N02	China	58	ncbi	Assembly									mph(A);catA1;tet(B);blaTEM-1B;sul2;dfrA17;aadA5;strA;strB;sul1	10
GCA_002992005.1	SC136	China	58	ncbi	Assembly		blaCTX-M-14							tet(A);erm(B);aac(3)-IId;dfrA14;mph(A);floR;aph(3')-Ia;strB;sul3;strA;aadA22;sul2;blaCTX-M-14;mcr-1.1	14
GCA_003009195.1	ECRLC09	China:Shandong	58	ncbi	Assembly									tet(A);dfrA17;mph(A);strB;blaTEM-1B;strA;catB3;oqxB;aac(3)-IId;blaOXA-1;aadA5;sul2;aac(6')Ib-cr;aph(3')-IIa;oqxA;fosA;aph(4)-Ia;QnrS2;aac(3)-IVa;floR;ARR-3;mcr-1.1	22
GCA_003144835.1	Win2013_WWKa_OUT_1	Germany: Dresden-Kaditz	58	ncbi	Assembly										0
GCA_003145535.1	Win2012_WWKa_NEU_37	Germany: Dresden-Kaditz	58	ncbi	Assembly									tet(A)	1
GCA_003145795.1	Spr2013_WWKa_OUT_15	Germany: Dresden-Kaditz	58	ncbi	Assembly									strB;sul2;blaTEM-1B;dfrA14;strA	5
GCA_003146575.1	Aut2013_WWKa_ALT_13	Germany: Dresden-Kaditz	58	ncbi	Assembly										0
GCA_003227915.1	TUM15671	Singapore	58	ncbi	Assembly	blaKPC-2								blaKPC-2;mph(A)	2
GCA_900110665.1	PA-3	unknown	58	ncbi	Assembly									dfrA14;tet(A);sul2;strA;strB	5
GCA_000163215.1	FVEC1302	unknown	69	ncbi	Assembly										0
GCA_000163235.1	FVEC1412	unknown	69	ncbi	Assembly					frameshift				dfrA17;aadA5;sul1	3
GCA_000164195.1	MS 198-1	unknown	69	ncbi	Assembly									catA1;sul2;strB;tet(B);strA	5
GCA_000225045.2	STEC_C165-02	unknown	69	ncbi	Assembly								Redundant		0
GCA_000264135.1	576-1	USA	69	ncbi	Assembly						not determined			sul2;sul1;tet(B);strA;aadA5;strB;dfrA17;mph(A)	8
GCA_000326145.1	KTE105	unknown	69	ncbi	Assembly										0
GCA_000326245.1	KTE128	unknown	69	ncbi	Assembly								Redundant	dfrA17;aadA5;tet(B);sul1	4
GCA_000326505.1	KTE82	unknown	69	ncbi	Assembly									strB;blaTEM-1B;sul2;dfrA17;aadA5;sul1;strA	7
GCA_000326785.1	KTE177	unknown	69	ncbi	Assembly									dfrA17;strA;aadA5;strB;sul1;tet(A);blaTEM-1B;sul2;mph(A)	9
GCA_000326945.1	KTE122	unknown	69	ncbi	Assembly										0
GCA_000350625.1	KTE2	unknown	69	ncbi	Assembly								Redundant	mph(A);sul1;aadA5;dfrA17;sul2;strA;strB;blaTEM-1B	8
GCA_000350825.1	KTE26	unknown	69	ncbi	Assembly									strB;strA;sul2;blaTEM-1B;tet(B)	5
GCA_000350925.1	KTE181	unknown	69	ncbi	Assembly								Redundant	blaTEM-1B;sul1;sul2;aadA5;dfrA17;strA;strB	7
GCA_000351065.1	KTE204	unknown	69	ncbi	Assembly								Redundant	tet(B);sul1;aadA5;dfrA17	4
GCA_000351125.1	KTE208	unknown	69	ncbi	Assembly						S83L/D87			tet(B);blaTEM-1B;sul2;sul1;strA;strB;aadA5;mph(A)	8
GCA_000351285.1	KTE228	unknown	69	ncbi	Assembly								Redundant	dfrA17;aadA5;sul1;mph(A);sul2;strA;strB;tet(A);blaTEM-1B	9
GCA_000351365.1	KTE235	unknown	69	ncbi	Assembly								Redundant	sul2;strA;strB;mph(A);blaTEM-1B	5
GCA_000351745.1	KTE80	Denmark	69	ncbi	Assembly									tet(A)	1
GCA_000351785.1	KTE83	Denmark	69	ncbi	Assembly								Redundant	sul2;blaTEM-1B;sul1;aadA5;strA;dfrA17;strB	7
GCA_000351885.1	KTE116	Denmark	69	ncbi	Assembly									blaTEM-1B;sul2;strA;strB;mph(A);mph(A)	5
GCA_000352345.1	KTE54	Denmark	69	ncbi	Assembly										0
GCA_000352745.1	KTE158	Denmark	69	ncbi	Assembly										0
GCA_000352825.1	KTE190	unknown	69	ncbi	Assembly								Redundant		0
GCA_000387865.2	HM69	USA: MI	69	ncbi	Assembly									blaTEM-1B;strA;sul1;blaTEM-1B;aadA5;strB;dfrA17	6
GCA_000407665.1	KTE1	unknown	69	ncbi	Assembly									dfrA17;sul2;strA;strB;blaTEM-1B;mph(A);sul1;aadA5	8
GCA_000407785.1	KTE231	unknown	69	ncbi	Assembly									strB;strA;tet(A)	3
GCA_000408185.1	KTE200	unknown	69	ncbi	Assembly								Redundant		0
GCA_000408265.1	KTE225	unknown	69	ncbi	Assembly						S83L/D87		Redundant	blaTEM-1B	1
GCA_000408385.1	KTE68	Denmark	69	ncbi	Assembly		blaCTX-M-14							blaCTX-M-14;blaTEM-1B	2
GCA_000408705.1	KTE127	Denmark	69	ncbi	Assembly									tet(B);sul1;aadA5;dfrA17	4
GCA_000408765.1	KTE134	Denmark	69	ncbi	Assembly						S83L/D87		Redundant	blaTEM-1B;sul1;sul2;strA;strB;tet(B);aadA5;mph(A)	8
GCA_000408825.1	KTE170	Denmark	69	ncbi	Assembly						S83L/D87			blaTEM-1B;dfrA5;sul1;strB;strA;sul2	6
GCA_000418615.2	MC6002	USA: MO	69	ncbi	Assembly									blaTEM-1B	1
GCA_000418635.1	MC23	USA: MO	69	ncbi	Assembly										0
GCA_000418655.1	MC21	USA: MO	69	ncbi	Assembly									blaTEM-1B;aac(3)-IId	2
GCA_000418675.1	MC19	USA: MO	69	ncbi	Assembly				frameshift					blaTEM-1B	1
GCA_000418695.2	AB43739056-isolate1	USA: MO	69	ncbi	Assembly									blaTEM-1B	1
GCA_000418775.1	112469218-isolate1	USA: MO	69	ncbi	Assembly									blaTEM-1B	1
GCA_000418795.1	112469215-isolate1	USA: MO	69	ncbi	Assembly				frameshift					blaTEM-1B	1
GCA_000456165.1	HVH 10 (4-6832164)	Denmark	69	ncbi	Assembly									blaTEM-1B;sul2;dfrA17;aadA5;strA;strB;sul1;mph(A)	8
GCA_000456445.1	HVH 29 (4-3418073)	Denmark	69	ncbi	Assembly										0
GCA_000456725.1	HVH 45 (4-3129918)	Denmark	69	ncbi	Assembly									tet(B);dfrA17;aadA5;sul1;sul2;strA;mph(A);strB;blaTEM-1B	9
GCA_000456925.1	HVH 63 (4-2542528)	Denmark	69	ncbi	Assembly									strB;strA;sul2;dfrA17;aadA5;sul1;blaTEM-1B	7
GCA_000456985.1	HVH 69 (4-2837072)	Denmark	69	ncbi	Assembly									blaTEM-1B	1
GCA_000457205.1	HVH 85 (4-0792144)	Denmark	69	ncbi	Assembly									blaTEM-1B	1
GCA_000457245.1	HVH 88 (4-5854636)	Denmark	69	ncbi	Assembly									blaTEM-1A;aac(3)-IVa;aph(4)-Ia;sul1;aadA1;strB;strA	7
GCA_000457475.1	HVH 106 (4-6881831)	Denmark	69	ncbi	Assembly								Redundant	blaTEM-1B;strB;strA;sul2;sul1;aadA5;dfrA17	7
GCA_000457535.1	HVH 110 (4-6978754)	Denmark	69	ncbi	Assembly									sul2;strA;strB;blaTEM-1B;sul1;aadA5;dfrA17	7
GCA_000457595.1	HVH 113 (4-7535473)	Denmark	69	ncbi	Assembly									tet(B);dfrA17;aadA5;sul1	4
GCA_000457735.1	HVH 119 (4-6879578)	Denmark	69	ncbi	Assembly									dfrA17;sul1;aadA5;mph(A);aadA5;sul1;dfrA17;blaTEM-1B	5
GCA_000457795.1	HVH 122 (4-6851606)	Denmark	69	ncbi	Assembly									dfrA17;aadA5;sul1;mph(A);blaTEM-1B;strB;strA;sul2	8
GCA_000457895.1	HVH 130 (4-7036876)	Denmark	69	ncbi	Assembly									blaTEM-1B;sul2;strA;strB;dfrA17;aadA5;sul1;catA1;tet(B);mph(A)	10
GCA_000457935.1	HVH 133 (4-4466519)	Denmark	69	ncbi	Assembly						S83L/D87			sul2;strA;blaTEM-1C;strB	4
GCA_000457955.1	HVH 134 (4-6073441)	Denmark	69	ncbi	Assembly						S83A/D87			strB;strA;sul2;dfrA17;aadA5;sul1;mph(A);blaTEM-1B	8
GCA_000457975.1	HVH 135 (4-4449320)	Denmark	69	ncbi	Assembly										0
GCA_000458055.1	HVH 140 (4-5894387)	Denmark	69	ncbi	Assembly									tet(B);mph(A);strA;strB;sul2	5
GCA_000458155.1	HVH 145 (4-5672112)	Denmark	69	ncbi	Assembly									strB;strA;sul2;blaTEM-1B	4
GCA_000458255.1	HVH 151 (4-5755573)	Denmark	69	ncbi	Assembly									sul2	1
GCA_000458315.1	HVH 155 (4-4509048)	Denmark	69	ncbi	Assembly								Redundant	tet(B);catA1;sul2;strA;strB;blaTEM-1B;sul1;aadA5;dfrA17	9
GCA_000458475.1	HVH 163 (4-4697553)	Denmark	69	ncbi	Assembly									dfrA17;sul1;aadA5;aadA5;sul1;dfrA17;blaTEM-1B;mph(A)	5
GCA_000458515.1	HVH 167 (4-6073565)	Denmark	69	ncbi	Assembly									sul2;strA;strB;mph(A);blaTEM-1B	5
GCA_000458625.1	HVH 173 (3-9175482)	Denmark	69	ncbi	Assembly								Redundant	sul1;dfrA17;tet(B);catA1;sul2;strA;strB;aadA5;blaTEM-1B	9
GCA_000458725.1	HVH 183 (4-3205932)	Denmark	69	ncbi	Assembly					-70; G -> T (OmpR F2)				mph(A);dfrA17;sul1;aadA5;aadA5;sul1;dfrA17;mph(A)	4
GCA_000458845.1	HVH 189 (4-3220125)	Denmark	69	ncbi	Assembly									strB;blaTEM-1C;strA;tet(B);catA1;sul2	6
GCA_000459175.1	HVH 206 (4-3128229)	Denmark	69	ncbi	Assembly										0
GCA_000459215.1	HVH 208 (4-3112292)	Denmark	69	ncbi	Assembly									tet(B);dfrA17;aadA5;sul1;mph(A);blaTEM-1B;sul2;strA;strB	9
GCA_000459335.1	HVH 215 (4-3008371)	Denmark	69	ncbi	Assembly									sul1;aadA5;dfrA17;blaTEM-1B	4
GCA_000459475.1	HVH 223 (4-2976528)	Denmark	69	ncbi	Assembly									strB;blaTEM-1B;strA;sul2	4
GCA_000459795.1	KOEGE 62 (175a)	Denmark	69	ncbi	Assembly									strB;tet(B);catA1;dfrA17;aadA5;sul1;blaTEM-1B	7
GCA_000459815.1	KOEGE 68 (182a)	Denmark	69	ncbi	Assembly										0
GCA_000459875.1	KOEGE 73 (195a)	Denmark	69	ncbi	Assembly									blaTEM-1C;strA;sul2;catA1;tet(B);sul1;aadA5;dfrA17;strB	9
GCA_000485695.1	907713	unknown	69	ncbi	Assembly									mph(A);sul2;dfrA17;aadA5;strA;strB;sul1;blaTEM-1B	8
GCA_000488435.1	907715	unknown	69	ncbi	Assembly						S83L/D87	S80I/E84		mph(A);blaTEM-1B;strB;tet(B);strA;sul2;dfrA14	7
GCA_000488515.1	908521	unknown	69	ncbi	Assembly									mph(A);sul2;sul1;aadA5;dfrA17;strB;blaTEM-1B;strA	8
GCA_000488535.1	908522	unknown	69	ncbi	Assembly				frameshift					blaTEM-1B;mph(A);aadA5;strA;dfrA17;sul1;strB;sul2	8
GCA_000488655.1	908585	unknown	69	ncbi	Assembly					-52; T -> A (OmpR F3)	S83L/D87N	S80I/E84		dfrA17;sul2;aadA5;sul1;strB;aac(3)-IId;blaTEM-1B;catA1;strA;tet(B);mph(A)	11
GCA_000488675.1	908616	unknown	69	ncbi	Assembly				frameshift					mph(A);catA1;dfrA17;blaTEM-1B;sul2;aadA5;strB;strA	8
GCA_000503435.1	328	unknown	69	ncbi	Assembly									sul2;sul1;tet(B);catA1;aadA5;dfrA17;blaTEM-1B;strB;strA	9
GCA_000599825.1	UCD_JA69	USA: UC Davis Medical Center	69	ncbi	Assembly									tet(B);dfrA8;strB;strA;sul2;blaTEM-1B	6
GCA_000687105.1	2-005-03_S3_C2	Tanzania	69	ncbi	Assembly									dfrA1;tet(B);aadA1;strB;sul1;strA;sul2;blaTEM-1B;catA1	9
GCA_000692775.1	MGH 58	USA: Boston	69	ncbi	Assembly						S83L/D87	S80I/E84		tet(B);dfrA14;dfrA14;mph(A);strA;strB;blaTEM-1B;sul2	7
GCA_000708145.1	EC1	USA: Mississippi	69	ncbi	Assembly										0
GCA_000708165.1	EC2	USA: Mississippi	69	ncbi	Assembly								Redundant		0
GCA_000711415.1	2-316-03_S1_C2	Tanzania	69	ncbi	Assembly									dfrA1;aadA1;strB;sul1;blaTEM-1B;strA;tet(B);sul2;catA1	9
GCA_000711475.1	2-316-03_S1_C1	Tanzania	69	ncbi	Assembly									catA1;blaTEM-1B;sul2;tet(B);strA;strB;dfrA1;aadA1;sul1	9
GCA_000714995.1	UCD_JA69_pb	USA: UC Davis Medical Center, Davis, Ca	69	ncbi	Assembly								Redundant		0
GCA_000740555.1	CS02	USA: Santa Clara	69	ncbi	Assembly						not determined			aac(3)-IId;tet(A);sul1;blaTEM-1B;aadA5;strB;dfrA17;mph(A);sul2	9
GCA_000776285.1	upec-82	USA: WA	69	ncbi	Assembly		blaCTX-M-14				S83L/D87N	S80I/E84		blaCTX-M-14;dfrA14;mph(A);blaTEM-1B;tet(B);strB	6
GCA_000776335.1	upec-69	USA: WA	69	ncbi	Assembly						S83L/D87N	S80I/E84		mph(A);tet(A);strB;strA;sul2;sul1;aadA5;dfrA17;aac(3)-IId;blaTEM-1B	10
GCA_000776775.1	upec-56	USA: WA	69	ncbi	Assembly									blaTEM-1B;dfrA17;aadA5;sul1	4
GCA_000777995.1	upec-256	USA: WA	69	ncbi	Assembly									mph(A);blaTEM-1B;dfrA17;aadA5;tet(B);sul1	6
GCA_000778055.1	upec-254	USA: WA	69	ncbi	Assembly						S83L/D87	S80/E84G		blaTEM-1B;catA1;sul2	3
GCA_000779675.1	upec-187	USA: WA	69	ncbi	Assembly										0
GCA_000780295.1	upec-155	USA: WA	69	ncbi	Assembly						S83L/D87	S80I/E84		blaTEM-1B;dfrA14;tet(B);blaTEM-1B;sul2;strA;strB;blaTEM-1B;mph(A)	7
GCA_000780515.1	blood-2011-0167	USA: Pacific Northwest	69	ncbi	Assembly							not determined		aph(3')-IIb;blaPAO;catB7;dfrA17;sul1;strB;blaOXA-50	7
GCA_000780575.1	upec-145	USA: WA	69	ncbi	Assembly						S83L/D87	S80/E84G		blaTEM-1B;catA1;sul2	3
GCA_000781235.1	upec-114	USA: WA	69	ncbi	Assembly										0
GCA_000781605.1	blood-10-0684	USA: Pacific Northwest	69	ncbi	Assembly						S83L/D87G	S80/E84G	Redundant	blaTEM-1B;sul2;dfrA17;aadA5	4
GCA_000781635.1	blood-10-0675	USA: Pacific Northwest	69	ncbi	Assembly						S83L/D87G	S80/E84G		sul2;aadA5;blaTEM-1B;dfrA17	4
GCA_000781855.1	blood-09-1305rep2	USA: Pacific Northwest	69	ncbi	Assembly									blaTEM-1B;strB;dfrA17;sul2;aadA5;sul1;strA	7
GCA_000781875.1	blood-09-1305rep1	USA: Pacific Northwest	69	ncbi	Assembly								Redundant	blaTEM-1B;strA;sul2;sul1;aadA5;dfrA17;strB	7
GCA_000781895.1	blood-09-1294	USA: Pacific Northwest	69	ncbi	Assembly									blaTEM-1B;strA;sul2;dfrA17;aadA5;sul1;strB	7
GCA_000782815.1	blood-08-0081	USA: WA	69	ncbi	Assembly						S83L/D87			mph(A);strB;aac(3)-IId;blaTEM-1B;blaTEM-1B;dfrA17;aadA5;strA;sul1;sul2;blaTEM-1B;tet(B)	10
GCA_001054845.1	283_ECOL	USA: WA	69	ncbi	Assembly								Redundant		0
GCA_001056215.1	284_ECOL	USA: WA	69	ncbi	Assembly										0
GCA_001059035.1	735_ECOL	USA: WA	69	ncbi	Assembly									sul2;strB;strA	3
GCA_001059105.1	774_ECOL	USA: WA	69	ncbi	Assembly						S83L/D87	S80I/E84		blaTEM-1B;strB;mph(A);tet(B);strA;sul2;dfrA14	7
GCA_001059455.1	966_ECOL	USA: WA	69	ncbi	Assembly										0
GCA_001067225.1	775_SBOY	USA: WA	69	ncbi	Assembly						S83L/D87	S80I/E84	Redundant	mph(A);blaTEM-1B;strB;tet(B);strA;sul2;dfrA14	7
GCA_001078015.1	PC-1	Sweden	69	ncbi	Assembly										0
GCA_001306675.1	UCD-JA18	USA: Sacramento, CA	69	ncbi	Assembly									strA;blaTEM-1B;dfrA17;sul2;aadA5;tet(B);catA1;strB;mph(A);sul1	10
GCA_001420075.1	224	Tanzania	69	ncbi	Assembly									strA;mph(A);blaTEM-1B;sul2;strB;tet(A);dfrA12;aadA2;sul1	9
GCA_001518365.1	GN02740	USA	69	ncbi	Assembly						S83L/D87			sul2;sul1;tet(B);mph(A);strA;aadA5;strB;dfrA17;blaTEM-1B;aac(3)-IId	10
GCA_001519395.1	GN02270	USA	69	ncbi	Assembly							not determined		blaTEM-1B	1
GCA_001519635.1	GN02354	USA	69	ncbi	Assembly						S83L/D87			blaTEM-1B;strB;tet(B);strA;sul2;dfrA14;mph(A)	7
GCA_001519685.1	GN02094	USA	69	ncbi	Assembly									mph(A);sul2;catA1;dfrA17;aadA5;strA;strB;sul1;blaTEM-1B	9
GCA_001519975.1	GN02415	USA	69	ncbi	Assembly									sul2;dfrA17;aadA5;strA;strB;sul1;blaTEM-1B	7
GCA_001520255.1	GN03578	USA	69	ncbi	Assembly						S83L/D87	S80I/E84		blaTEM-1B;strB;tet(B);strA;sul2;dfrA14	6
GCA_001520375.1	GN02460	USA	69	ncbi	Assembly					-83; Ins T (OmpR F1)	S83L/D87	S80/E84G		sul1;tet(B);sul2;aadA5;dfrA17;blaTEM-1B;catA1	7
GCA_001550005.1	O78	China	69	ncbi	Assembly					frameshift				mph(A);blaTEM-1B;catA1;sul1;aadA5;aac(3)-IId;dfrA17;tet(B)	8
GCA_001562855.1	JPH493	unknown	69	ncbi	Assembly									blaTEM-1B;sul2;dfrA17;mph(A);aadA5;strA;strB;sul1	8
GCA_001607595.1	STEC 2595	Netherlands	69	ncbi	Assembly				recombined						0
GCA_001621075.1	GN04592	USA	69	ncbi	Assembly									tet(B);sul2;strA;strB;blaTEM-1B	5
GCA_001621165.1	GN04729	USA	69	ncbi	Assembly				recombined					tet(B);sul2;strA;dfrA17;strB;blaTEM-1B	6
GCA_001621405.1	GN05225	USA	69	ncbi	Assembly									blaTEM-30	1
GCA_001621545.1	GN05505	USA	69	ncbi	Assembly						S83A/D87			blaTEM-1B	1
GCA_001621585.1	GN05554	USA	69	ncbi	Assembly									tet(B);sul2;strA;strB;blaTEM-1B;dfrA17	6
GCA_001621905.1	GN06007	USA	69	ncbi	Assembly									sul1;aadA5;dfrA17;blaTEM-1B	4
GCA_001622025.1	GN06124	USA	69	ncbi	Assembly									aadA5;catA1;tet(B);sul1;dfrA17	5
GCA_001622075.1	GN06156	USA	69	ncbi	Assembly									blaCMY-2	1
GCA_001654735.1	007PP2015	Poland	69	ncbi	Assembly					-52; T -> A (OmpR F3)	S83L/D87N	S80I/E84		mph(A);strB;tet(B);sul2;dfrA17;aadA5;catA1;sul1;blaTEM-1B;aac(3)-IId;strA;mcr-1.1	12
GCA_001749045.1	K506	Israel	69	ncbi	Assembly									sul2;strA;sul1;aadA1;dfrA1;tet(A);aph(3')-Ic;blaTEM-1C	8
GCA_001749565.1	VL2762-1	Israel	69	ncbi	Assembly									strB;dfrA14;sul2	3
GCA_001909105.1	ECG023	India	69	ncbi	Assembly						S83L/D87	S80R/E84E		sul2;tet(B);strA;strB;dfrA17;blaTEM-1B	6
GCA_001931785.1	4626_wz	China: Wenzhou	69	ncbi	Assembly	blaOXA-48					S83L/D87			blaOXA-48	1
GCA_002001535.1	18.1-R1	Australia: Sydney	69	ncbi	Assembly									tet(B);blaTEM-1B	2
GCA_002001785.1	4-R2	Australia: Sydney	69	ncbi	Assembly									mph(A);tet(A);blaTEM-1B;strB;strA;sul2;sul1;aadA5;dfrA17	9
GCA_002001855.1	4.4-R2b	Australia: Sydney	69	ncbi	Assembly									mph(A);tet(A);blaTEM-1B;strB;strA;sul2	6
GCA_002001915.1	14.1-R1	Australia: Sydney	69	ncbi	Assembly									mph(A);tet(A);blaTEM-1B;strB;strA;sul2;sul1;aadA5;dfrA17	9
GCA_002002255.1	4.3-R2a	Australia: Sydney	69	ncbi	Assembly									blaTEM-1B	1
GCA_002002585.1	11.2-R2	Australia: Sydney	69	ncbi	Assembly									mph(A);tet(A);strB;blaTEM-1B;strA;sul2;sul1;aadA5;dfrA17	9
GCA_002087565.1	OS_02_021_10	USA: MO	69	ncbi	Assembly									blaTEM-1B	1
GCA_002109565.1	FVEC1465	unknown	69	ncbi	Assembly					frameshift				sul1;tet(B);aadA5;dfrA17;blaTEM-1B;sul2;strA;strB;catA1;mph(A)	10
GCA_002133455.1	OLC998	Canada	69	ncbi	Assembly										0
GCA_002152025.1	MGH130	USA: Massachusetts, Boston	69	ncbi	Assembly									blaTEM-1B;tet(A)	2
GCA_002166675.1	9.1a	USA: WA, Seattle	69	ncbi	Assembly										0
GCA_002190945.1	ECOR47	Papua New Guinea	69	ncbi	Assembly									aadA1	1
GCA_002244815.1	151-1941	USA: Seattle	69	ncbi	Assembly										0
GCA_002244845.1	157-2180	USA: Seattle	69	ncbi	Assembly									dfrA17;aadA5;sul1;blaTEM-1B	4
GCA_002244965.1	73-938	USA: Seattle	69	ncbi	Assembly						S83L/D87			strA;blaTEM-1B;mph(A);sul1;aadA5;dfrA17;sul2	7
GCA_002245095.1	251-3129	USA: Seattle	69	ncbi	Assembly						S83L/D87			tet(B);blaTEM-1B	2
GCA_002268235.1	EC-117-6-3	Sweden	69	ncbi	Assembly								Redundant	strB;sul2;strA;blaTEM-1C	4
GCA_002268315.1	EC-117-6-2	Sweden	69	ncbi	Assembly								Redundant	strB;sul2;strA;blaTEM-1C	4
GCA_002268335.1	EC-117-4-3	Sweden	69	ncbi	Assembly								Redundant	strB;blaTEM-1C;strA;sul2	4
GCA_002268375.1	EC-117-4-2	Sweden	69	ncbi	Assembly									sul2;strA;strB;blaTEM-1C	4
GCA_002278115.2	CFSAN061770	Egypt	69	ncbi	Assembly					-52; T -> A (OmpR F3)	S83L/D87N	S80I/E84		aph(3')-Ia;strB;strA;sul2;tet(A);aadA2;cmlA1;aadA1;sul3;floR;blaTEM-1B;dfrA17;aadA5;aac(3)-IId;mcr-1.1	15
GCA_002287275.1	EC-117-5-1	Sweden	69	ncbi	Assembly								Redundant	strB;sul2;strA;blaTEM-1C	4
GCA_002442185.1	33_Esco_HA-NL	Netherlands	69	ncbi	Assembly		blaCTX-M-14							aacA4;cmlA1;erm(B);mph(A);blaCTX-M-14	5
GCA_002443135.1	M12	USA	69	ncbi	Assembly										0
GCA_002456805.1	MOD1-EC685	USA: WA	69	ncbi	Assembly									aph(3')-Ic;tet(B);sul2;strB;strA	5
GCA_002465125.1	MOD1-EC893	Mexico	69	ncbi	Assembly										0
GCA_002465555.1	MOD1-EC914	Mexico	69	ncbi	Assembly										0
GCA_002466895.1	MOD1-EC686	USA: WA	69	ncbi	Assembly								Redundant	aph(3')-Ic;tet(B);sul2;strB;strA	5
GCA_002468265.1	MOD1-EC6900	USA: ND	69	ncbi	Assembly									sul2;dfrA5;strA;strB;blaTEM-1B	5
GCA_002515995.1	MOD1-EC3829	USA	69	ncbi	Assembly									mph(B);sul2;strA;strB;dfrA1;aadA1;tet(A);blaTEM-1B;sul1	9
GCA_002518485.1	MOD1-EC6995	USA: IA	69	ncbi	Assembly									strA;strB;aph(3')-Ic;sul2;tet(B)	5
GCA_002520885.1	MOD1-EC6831	USA: ND	69	ncbi	Assembly									sul2;tet(B);strB;strA	4
GCA_002520975.1	MOD1-EC6806	USA: MI	69	ncbi	Assembly										0
GCA_002537475.1	MOD1-EC6104	USA:CA	69	ncbi	Assembly						S83L/D87N	S80I/E84		aac(3)-IId;sul2;aph(3')-Ia;dfrA17;strA;strB;blaTEM-1B;tet(B)	8
GCA_002538775.1	MOD1-EC5978	USA:WI	69	ncbi	Assembly										0
GCA_002631435.1	33b_Esco_HA-NL	Netherlands	69	ncbi	Assembly		blaCTX-M-14						Redundant	cmlA1;erm(B);mph(A);aacA4;blaCTX-M-14	5
GCA_002734205.1	CD2-a	Chile: Santiago	69	ncbi	Assembly									sul2;blaTEM-1B;aac(3)-IIa;strA;strB	5
GCA_002761625.1	ABU 123	Hungary	69	ncbi	Assembly										0
GCA_002810125.1	K56-75	United Kingdom	69	ncbi	Assembly										0
GCA_002886425.1	YD761	USA: Pennsylvania	69	ncbi	Assembly	blaKPC-3								blaTEM-1B;blaSHV-12;blaKPC-3	3
GCA_003074455.1	BMX2_J05303_8/8TZP	Austria	69	ncbi	Assembly									strB;strA;tet(B);sul2;blaTEM-1B;dfrA17	6
GCA_003074475.1	BMX2_J05302_4/4TZP	Austria	69	ncbi	Assembly									dfrA17;aadA5;blaTEM-1B;sul2;strA;strB;sul1;tet(B)	8
GCA_003074495.1	BMX2_J05301_noTZP	Austria	69	ncbi	Assembly									blaTEM-1B;dfrA17;aadA5;sul1;strB;strA;sul2;tet(B)	8
GCA_003145085.1	Win2013_WWKa_OUT_24	Germany: Dresden-Kaditz	69	ncbi	Assembly						S83L/D87			blaTEM-1B	1
GCA_003145115.1	Win2013_WWKa_NEU_65	Germany: Dresden-Kaditz	69	ncbi	Assembly										0
GCA_003145305.1	Win2012_WWKa_ALT_49	Germany: Dresden-Kaditz	69	ncbi	Assembly										0
GCA_003145445.1	Sum2013_WWKa_NEU_46	Germany: Dresden-Kaditz	69	ncbi	Assembly										0
GCA_003145515.1	Sum2013_WWKa_ALT_20	Germany: Dresden-Kaditz	69	ncbi	Assembly						S83L/D87	S80/E84G		blaTEM-1B;sul2	2
GCA_003145775.1	Spr2013_WWKa_OUT_45	Germany: Dresden-Kaditz	69	ncbi	Assembly										0
GCA_003145805.1	Spr2013_WWKa_OUT_29	Germany: Dresden-Kaditz	69	ncbi	Assembly						S83L/D87			blaTEM-1B;aac(3)-IIa;tet(A);sul1;aadA5;mph(A);dfrA17	7
GCA_003175615.1	TUM13867	unknown	69	ncbi	Assembly	blaIMP-6	blaCTX-M-2							dfrA14;aadA2;aacA4;sul1;tet(A);blaTEM-1B;blaCTX-M-2;strB;strA;sul2;blaIMP-6	11
GCA_003227815.1	TUM15665	Singapore	69	ncbi	Assembly	blaKPC-2	blaCTX-M-3					S80I/E84		QnrB6;sul1;QnrS1;tet(A);mph(A);blaCTX-M-3;aac(6')Ib-cr;ARR-3;blaKPC-2;dfrA27;blaTEM-1B;aadA16;sul1	12
GCA_900166825.1	18	unknown	69	ncbi	Assembly		blaCTX-M-14				S83L/D87			aacA4;blaTEM-1B;aph(3')-Ia;cmlA1;sul2;strA;strB;aac(3)-IId;blaCTX-M-14	9
GCA_000776115.1	upec-58	USA: WA	83	ncbi	Assembly										0
GCA_000778215.1	upec-244	USA: WA	83	ncbi	Assembly										0
GCA_002189985.1	ECOR66	USA: Washington	83	ncbi	Assembly									sul2	1
GCA_002467895.1	MOD1-EC7008	USA: CA	83	ncbi	Assembly										0
GCA_002855655.1	Ec-HUCA 3	Spain: Oviedo	83	ncbi	Assembly	blaOXA-48								blaOXA-48	1
GCA_000164215.1	MS 84-1	unknown	88	ncbi	Assembly									sul1;aph(3')-Ia;tet(A);sul2;blaTEM-1B;floR;strA;aadB;strB;aadA1	10
GCA_000179075.1	MS 85-1	unknown	88	ncbi	Assembly									strA;floR;tet(A);sul2;strB;aph(3')-Ia;sul1;blaTEM-1B;aadA1;aadB	10
GCA_000179135.1	MS 124-1	unknown	88	ncbi	Assembly									strA;sul1;tet(A);sul2;strB;aph(3')-Ia;floR;blaTEM-1B;aadB;aadA1	10
GCA_000326765.1	KTE166	unknown	88	ncbi	Assembly										0
GCA_000408245.1	KTE222	unknown	88	ncbi	Assembly										0
GCA_000456245.1	HVH 18 (4-8589585)	Denmark	88	ncbi	Assembly									blaOXA-1;sul1;aadA1;dfrA1;aadA1;sul1;tet(B);catA1	6
GCA_000456525.1	HVH 33 (4-2174936)	Denmark	88	ncbi	Assembly									mph(B);sul1;aadA1;dfrA1;strB;strA;sul2;catA1;blaTEM-1B	9
GCA_000457775.1	HVH 121 (4-6877826)	Denmark	88	ncbi	Assembly									sul1;aadA1;catA1	3
GCA_000458235.1	HVH 150 (4-3258106)	Denmark	88	ncbi	Assembly										0
GCA_000461315.1	UMEA 3355-1	Sweden	88	ncbi	Assembly									strB;strA;sul2;blaTEM-1C	4
GCA_000692895.1	UCI 66	USA: California	88	ncbi	Assembly									blaCMY-2	1
GCA_000780535.1	upec-147	USA: WA	88	ncbi	Assembly									aadA1;tet(B);sul2;sul1;sul1;aadB;aadA1;catA1;floR;blaOXA-1	8
GCA_000780555.1	upec-146	USA: WA	88	ncbi	Assembly									aadA1;floR;tet(B);catA1;sul1;sul2;sul1;sul1;aadB;aadA1;blaOXA-1	8
GCA_000782555.1	blood-08-1420	USA: WA	88	ncbi	Assembly									strB;strA;sul2;tet(A)	4
GCA_000782595.1	blood-08-1414	USA: WA	88	ncbi	Assembly									strB;strA;sul2	3
GCA_000798175.1	CVM N41586PS	USA	88	ncbi	Assembly									tet(A);aph(3')-Ia;dfrA5;sul2;strB;blaTEM-1B;strA	7
GCA_000819645.1	789	Israel	88	ncbi	Assembly									tet(A);aadA1;sul1	3
GCA_001276265.1	C8	Australia: Brisbane	88	ncbi	Assembly									tet(A);blaTEM-1C	2
GCA_001421045.1	SLPE	China: Changchun	88	ncbi	Assembly									sul2;tet(B);floR;ARR-3;aph(4)-Ia;catB3;blaOXA-1;aac(6')Ib-cr;sul1;aac(3)-IVa	10
GCA_001615045.1	swine8	China:Shanghai	88	ncbi	Assembly									tet(A);sul2;strA;aadA1;tet(B);sul1;catA1;aph(3')-Ic	8
GCA_001615455.1	swine23	China:Jiangsu	88	ncbi	Assembly									floR;aac(6')Ib-cr;oqxB;tet(A);catB3;sul3;ARR-3;sul1;oqxA;sul2;aadA1;cmlA1;aph(3')-Ia;aph(4)-Ia;aadA2;aac(3)-IVa;blaOXA-1	17
GCA_001630825.1	RCE02	Russia: Moscow	88	ncbi	Assembly		blaCTX-M-15							blaOXA-1;sul1;blaCTX-M-15;aadA5;mph(A);dfrA17	6
GCA_001637785.1	RiKo 2351/09	Germany	88	ncbi	Assembly									sul2;mph(B);sul1;aadA1;dfrA1;strA;catA1;blaTEM-1B;strB;tet(A)	10
GCA_001984845.1	CF341	Brazil:Sao Paulo	88	ncbi	Assembly		blaCTX-M-2							sul2;aadA1;aadA2;sul3;sul1;blaCTX-M-2;mcr-1.1	7
GCA_002155325.1	AUH_IMP168	Lebanon	88	ncbi	Assembly	blaOXA-48								aadA1;catA1;tet(B);fosA;blaOXA-48;dfrA1	6
GCA_002155595.1	AUH_IMP443	Lebanon	88	ncbi	Assembly	blaOXA-48								catA1;tet(B);dfrA1;aadA1;blaOXA-48	5
GCA_002190075.1	ECOR70	USA: Washington	88	ncbi	Assembly									sul2	1
GCA_002207545.1	E1102	Egypt	88	ncbi	Assembly									sul2;dfrA7;sul1;tet(A);strA;blaTEM-1B;strB	7
GCA_002212055.1	ECA-B	USA	88	ncbi	Assembly									sul1;aadA1;dfrA1;blaTEM-1D;sul2;strB;strB;strA;strA;catA1;tet(A);aph(3')-Ic	10
GCA_002225835.1	MOD1-EC5741	USA:IA	88	ncbi	Assembly									blaTEM-1B;aph(3')-Ic;tet(B);sul2;strB;strA	6
GCA_002226725.1	MOD1-EC5690	USA:OH	88	ncbi	Assembly									sul1;tet(A);aadA1;catA1;blaTEM-1C	5
GCA_002231565.1	MOD1-EC5206	USA:PA	88	ncbi	Assembly									strB;sul2;tet(B);blaTEM-1B;strA	5
GCA_002456855.1	MOD1-EC676	USA: WA	88	ncbi	Assembly									tet(B);aph(3')-Ic;sul2;strB;strA	5
GCA_002459715.1	MOD1-EC1687	USA: CA	88	ncbi	Assembly										0
GCA_002460505.1	MOD1-EC1688	USA: CA	88	ncbi	Assembly										0
GCA_002463215.1	MOD1-EC6223	USA: NE	88	ncbi	Assembly									tet(B);sul2;strA;strB;aph(3')-Ic	5
GCA_002464455.1	MOD1-EC5885	USA:CA	88	ncbi	Assembly										0
GCA_002464465.1	MOD1-EC5266	USA:ND	88	ncbi	Assembly									aph(4)-Ia;aac(3)-IVa;tet(B);aadA1;dfrA1;sul2;blaCMY-2;strA;strB;floR;tet(A)	11
GCA_002465345.1	MOD1-EC708	USA: WA	88	ncbi	Assembly									sul1;tet(A);aadA1;sul2;catA1;strA;blaTEM-1C;tet(B);strB	9
GCA_002466775.1	MOD1-EC698	USA: WA	88	ncbi	Assembly									strA;strB;aph(3')-Ic;sul2;tet(C);tet(B);blaTEM-1B	7
GCA_002467485.1	MOD1-EC6717	USA: CA	88	ncbi	Assembly										0
GCA_002468655.1	MOD1-EC6718	USA: CA	88	ncbi	Assembly										0
GCA_002474485.1	MOD1-EC5775	USA: MI	88	ncbi	Assembly										0
GCA_002475215.1	MOD1-EC5076	USA: ME	88	ncbi	Assembly									strA;sul2;aac(3)-VIa;blaTEM-1B;aph(3')-Ia;tet(A);tet(B);floR;blaCMY-2;sul1;strB	11
GCA_002486935.1	MOD1-EC6307	USA: IA	88	ncbi	Assembly									sul2;blaTEM-1B;tet(A);sul1;aadA2;dfrA12	6
GCA_002511815.1	MOD1-EC6520	India	88	ncbi	Assembly									dfrA5;sul1;tet(A)	3
GCA_002512125.1	MOD1-EC6452	USA: IA	88	ncbi	Assembly									catA1;dfrA1;aadA1;sul1	4
GCA_002512655.1	MOD1-EC6337	USA: MI	88	ncbi	Assembly										0
GCA_002512815.1	MOD1-EC6267	USA: PA	88	ncbi	Assembly									aadA1;blaOXA-2;tet(B);sul1	4
GCA_002513155.1	MOD1-EC6524	India	88	ncbi	Assembly									blaOXA-1;catB3;aadA1;sul1;catA1;dfrA18;aadB	7
GCA_002513625.1	MOD1-EC6426	USA: MI	88	ncbi	Assembly										0
GCA_002513795.1	MOD1-EC6392	USA: NE	88	ncbi	Assembly									tet(B);sul2;strA;strB;aph(3')-Ic	5
GCA_002517695.1	MOD1-EC6403	USA: PA	88	ncbi	Assembly									aadA1;aac(3)-VIa;sul2;tet(A);sul1	5
GCA_002519625.1	MOD1-EC6929	USA: MI	88	ncbi	Assembly									dfrA1;aph(3')-Ic;strA;aac(3)-VIa;sul2;strB;tet(B);sul1	8
GCA_002520005.1	MOD1-EC6884	USA: ND	88	ncbi	Assembly									tet(A);blaTEM-1B	2
GCA_002520305.1	MOD1-EC6867	USA: PA	88	ncbi	Assembly									tet(A);strA;blaTEM-1C;sul2;blaTEM-1C;dfrA1;aadA1;sul1	7
GCA_002521665.1	MOD1-EC6799	USA: MI	88	ncbi	Assembly									sul2;aph(3')-Ic;tet(B);strB;strA	5
GCA_002534785.1	MOD1-EC5925	USA:NY	88	ncbi	Assembly										0
GCA_002548935.1	MOD1-EC5828	USA:PA	88	ncbi	Assembly									tet(B)	1
GCA_002549615.1	MOD1-EC5817	USA:PA	88	ncbi	Assembly										0
GCA_002804345.1	S17-13	China: Jilin Province	88	ncbi	Assembly										0
GCA_002812685.1	S17-20	China: Jilin	88	ncbi	Assembly										0
GCA_002853805.1	14EC029	China	88	ncbi	Assembly		blaCTX-M-14							blaCTX-M-14;fosA;aac(3)-IVa;sul2;floR;dfrA12;aadA2;cmlA1;aadA1;sul3;aph(3')-Ia;sul1;oqxA;tet(A);oqxB;QnrS1;dfrA12;aadA2;cmlA1;aadA1;sul3;mef(B);aph(3')-Ia;mph(A);mcr-1.1	19
GCA_003144995.1	Win2012_WWKa_OUT_33	Germany: Dresden-Kaditz	88	ncbi	Assembly									sul2;blaTEM-1B;strA;strB;strB;strA	4
GCA_900087775.1	RL145	unknown	88	ncbi	Assembly									sul1;aadA1;blaOXA-1;aph(3')-Ia;tet(B);blaTEM-52C;mcr-1.1	7
GCA_900089795.1	CQ09	unknown	88	ncbi	Assembly		blaCTX-M-55							erm(B);tet(A);blaCTX-M-55;mph(A);sul2;sul3;aph(3')-Ia;floR;strB;sul1;aadA1;cmlA1;aadA2;dfrA12;strA;mcr-1.1	16
GCA_000225245.2	TX1999	unknown	90	ncbi	Assembly									aadA13;tet(B)	2
GCA_000249695.2	DEC7A	unknown	90	ncbi	Assembly										0
GCA_000249735.2	DEC7C	unknown	90	ncbi	Assembly									tet(B);aadA13	2
GCA_000249755.2	DEC7D	unknown	90	ncbi	Assembly									tet(B)	1
GCA_000249775.2	DEC7E	unknown	90	ncbi	Assembly									blaTEM-1B;blaTEM-1B	1
GCA_000268125.1	EPECa12	unknown	90	ncbi	Assembly									sul2;strB;aadA13;sul1;strA	5
GCA_001615125.1	swine12	China:Zhejiang	90	ncbi	Assembly									strA;tet(A);strB	3
GCA_001708145.1	Ec47VL	Brazil	90	ncbi	Assembly		blaCTX-M-15							blaCTX-M-15;sul2;tet(B);strA;aac(3)-IId;mph(A);strB;aph(3')-Ia;sul1;aadA5;blaTEM-1B;dfrA17	12
GCA_001900635.1	D3	unknown	90	ncbi	Assembly		blaCTX-M-55							blaTEM-1B;tet(B);sul2;tet(B);catA1;dfrA17;aadA5;sul1;blaCTX-M-55;mph(A);blaCTX-M-55;strA;blaTEM-1B;strB	11
GCA_002134765.1	13B	Brazil: Sao Paulo	90	ncbi	Assembly		blaCTX-M-15							tet(B);aph(3')-Ia;sul2;blaCTX-M-15;strB;sul1;blaTEM-1B;aac(3)-IId;aadA5;dfrA8;dfrA17;tet(A);strA;mph(A)	14
GCA_002134775.1	34VL	Brazil: Sao Paulo	90	ncbi	Assembly		blaCTX-M-15							QnrB19;tet(B);dfrA17;aph(3')-Ia;sul2;blaCTX-M-15;aadA5;aac(3)-IId;strA;sul1;strB;blaTEM-1B;mph(A)	13
GCA_002153055.1	MGH187	USA: Massachusetts, Boston	90	ncbi	Assembly	blaNDM-1	blaCTX-M-15							aph(3')-Ia;blaNDM-1;aph(3')-VIa;rmtC;sul1;cmlA1;ARR-3;blaOXA-1;aac(6')Ib-cr;QnrB66;dfrA14;blaCTX-M-15;blaTEM-1B;strB;strA;sul2;blaCMY-6	17
GCA_002208025.1	ECC8	Brazil	90	ncbi	Assembly		blaCTX-M-15							blaCTX-M-15;tet(B)	2
GCA_002223625.1	FC10247	China: Beijing	90	ncbi	Assembly		blaCTX-M-15							aac(6')Ib-cr;aac(3)-IIa;tet(B);blaOXA-1;blaCTX-M-15	5
GCA_002225505.1	MOD1-EC5753	USA:SD	90	ncbi	Assembly									strB	1
GCA_002225665.1	MOD1-EC5746	USA:SD	90	ncbi	Assembly									tet(B);aadA13;sul1	3
GCA_002231005.1	MOD1-EC5274	USA:OK	90	ncbi	Assembly									aph(3')-Ic;strB;strA;tet(B)	4
GCA_002231995.1	MOD1-EC5754	USA:SD	90	ncbi	Assembly									strB;tet(B);aph(3')-Ic;strA;sul2	5
GCA_002464345.1	MOD1-EC6912	USA:PA	90	ncbi	Assembly									aadA13;sul1	2
GCA_002466745.1	MOD1-EC102	USA	90	ncbi	Assembly									tet(B);strA;strB	3
GCA_002466755.1	MOD1-EC101	USA	90	ncbi	Assembly									strA;strB;aph(3')-Ic	3
GCA_002473605.1	MOD1-EC5756	USA:SD	90	ncbi	Assembly										0
GCA_002485615.1	MOD1-EC6534	USA: MI	90	ncbi	Assembly									aph(4)-Ia;aac(3)-IVa;strA;strB;tet(B)	5
GCA_002513315.1	MOD1-EC6495	USA: MI	90	ncbi	Assembly									strB;aph(3')-Ic;tet(B);strA;sul2;sul1;aadA4	7
GCA_002517015.1	MOD1-EC5215	USA: PA	90	ncbi	Assembly									tet(B);strB;strA	3
GCA_002534695.1	MOD1-EC5932	Puerto Rico	90	ncbi	Assembly									blaTEM-1B;strA;strB	3
GCA_002535125.1	MOD1-EC6224	USA:MD	90	ncbi	Assembly									aph(3')-Ic;blaTEM-1B;tet(B)	3
GCA_002535195.1	MOD1-EC6198	USA:NJ	90	ncbi	Assembly									sul3;tet(B)	2
GCA_002545925.1	MOD1-EC5856	USA:PA	90	ncbi	Assembly									tet(B);aph(3')-Ia;sul1;aadA7	4
GCA_002631495.1	42_Esco_HA-DE	Germany	90	ncbi	Assembly		blaCTX-M-15							blaTEM-1B;blaCTX-M-15;aac(3)-IIa;tet(A);dfrA17;aadA5;sul1;mph(A);aac(6')Ib-cr;blaOXA-1	10
GCA_002893905.2	CV839-06	China:Harbin Veteriunknownry Research Institute	90	ncbi	Assembly									strB;strA;tet(B)	3
GCA_002929195.1	9CSI I	Brazil: Southwest	90	ncbi	Assembly		blaCTX-M-15							blaCTX-M-15	1
GCA_002941425.1	YH17165	China: Anhui	90	ncbi	Assembly		blaCTX-M-55							strA;dfrA17;catB3;aadA5;aph(3')-Ic;strB;blaCTX-M-55;ARR-3;blaTEM-1B;aac(3)-IId;sul1;aac(6')Ib-cr;floR;tet(A);sul2;blaOXA-1;QnrS2;mph(A);mcr-1.1	19
GCA_003008935.1	GZC13-7	China:Guangzhou	90	ncbi	Assembly		blaCTX-M-15							dfrA14;aac(3)-IIa;aac(6')Ib-cr;blaCTX-M-15;sul2;strA;strB;blaTEM-1B;blaOXA-1	9
GCA_003146495.1	Aut2013_WWKa_ALT_48	Germany: Dresden-Kaditz	90	ncbi	Assembly									blaOXA-1;blaTEM-1B;strA;tet(B);sul2;aac(3)-IId;blaTEM-1B;blaTEM-1B;strB;aac(6')Ib-cr;mph(A);QnrS1;dfrA17	11
GCA_003194715.1	16VS	Brazil	90	ncbi	Assembly		blaCTX-M-15							dfrA17;aph(3')-Ia;blaCTX-M-15;sul2;aadA5;aac(3)-IId;strA;sul1;strB;blaTEM-1B;tet(B);mph(A)	12
GCA_000013265.1	UTI89	unknown	95	ncbi	Assembly										0
GCA_000014845.1	APEC O1	unknown	95	ncbi	Assembly									sul1;tet(C);aadA1;aac(3)-VIa	4
GCA_000025745.1	IHE3034	unknown	95	ncbi	Assembly										0
GCA_000026285.2	S88	unknown	95	ncbi	Assembly										0
GCA_000157115.2	3_2_53FAA	unknown	95	ncbi	Assembly										0
GCA_000164415.1	MS 110-3	unknown	95	ncbi	Assembly										0
GCA_000190895.1	H252	unknown	95	ncbi	Assembly										0
GCA_000190915.1	H263	unknown	95	ncbi	Assembly										0
GCA_000233675.2	cloneA_i1	unknown	95	ncbi	Assembly										0
GCA_000241975.1	H397	unknown	95	ncbi	Assembly									blaTEM-1B	1
GCA_000264175.1	HM605	United Kingdom	95	ncbi	Assembly									strA;strB;sul2	3
GCA_000285375.1	HM605	unknown	95	ncbi	Assembly									sul2;strA;blaTEM-1C;strB	4
GCA_000326485.1	KTE179	unknown	95	ncbi	Assembly										0
GCA_000350645.1	KTE4	unknown	95	ncbi	Assembly									strB;strA;sul2	3
GCA_000350665.1	KTE5	unknown	95	ncbi	Assembly									tet(A);blaTEM-1C	2
GCA_000351505.1	KTE55	Denmark	95	ncbi	Assembly										0
GCA_000351565.1	KTE58	Denmark	95	ncbi	Assembly									strB;blaTEM-1C;strA;sul2	4
GCA_000351605.1	KTE62	Denmark	95	ncbi	Assembly									dfrA5	1
GCA_000352265.1	KTE22	unknown	95	ncbi	Assembly										0
GCA_000352365.1	KTE59	Denmark	95	ncbi	Assembly										0
GCA_000352405.1	KTE65	Denmark	95	ncbi	Assembly										0
GCA_000352545.1	KTE118	Denmark	95	ncbi	Assembly									strB;blaTEM-1C;strA;sul2	4
GCA_000352565.1	KTE123	Denmark	95	ncbi	Assembly										0
GCA_000353165.1	KTE229	unknown	95	ncbi	Assembly										0
GCA_000407685.1	KTE3	unknown	95	ncbi	Assembly									strB;strA;sul2	3
GCA_000407705.1	KTE7	unknown	95	ncbi	Assembly									tet(A);blaTEM-1C	2
GCA_000407885.1	KTE27	unknown	95	ncbi	Assembly									dfrA5;blaTEM-1B;strB;strA;sul2	5
GCA_000408305.1	KTE240	unknown	95	ncbi	Assembly									dfrA5	1
GCA_000456005.1	HVH 1 (4-6876161)	Denmark	95	ncbi	Assembly										0
GCA_000456045.1	HVH 3 (4-7276001)	Denmark	95	ncbi	Assembly									strA;strB;aph(3')-Ic;tet(B);sul2	5
GCA_000456085.1	HVH 5 (4-7148410)	Denmark	95	ncbi	Assembly										0
GCA_000456265.1	HVH 19 (4-7154984)	Denmark	95	ncbi	Assembly										0
GCA_000456465.1	HVH 30 (4-2661829)	Denmark	95	ncbi	Assembly										0
GCA_000456505.1	HVH 32 (4-3773988)	Denmark	95	ncbi	Assembly									blaTEM-1B;dfrA14;sul2;strA;strB	5
GCA_000456545.1	HVH 35 (4-2962667)	Denmark	95	ncbi	Assembly										0
GCA_000456665.1	HVH 42 (4-2100061)	Denmark	95	ncbi	Assembly									blaTEM-1B;sul2;strA;strB	4
GCA_000456765.1	HVH 48 (4-2658593)	Denmark	95	ncbi	Assembly									dfrA5;blaTEM-1B;sul2;strA;strB;sul1	6
GCA_000456885.1	HVH 59 (4-1119338)	Denmark	95	ncbi	Assembly									blaTEM-1C;blaTEM-1C;tet(A);strB;sul2;strA;blaTEM-1C	5
GCA_000457025.1	HVH 73 (4-2393174)	Denmark	95	ncbi	Assembly									blaTEM-1B;dfrA17;aadA5;sul1	4
GCA_000457065.1	HVH 76 (4-2538717)	Denmark	95	ncbi	Assembly										0
GCA_000457455.1	HVH 104 (4-6977960)	Denmark	95	ncbi	Assembly									sul1;aadA5;dfrA17;blaTEM-1B	4
GCA_000457715.1	HVH 118 (4-7345399)	Denmark	95	ncbi	Assembly										0
GCA_000457835.1	HVH 126 (4-6034225)	Denmark	95	ncbi	Assembly										0
GCA_000457855.1	HVH 127 (4-7303629)	Denmark	95	ncbi	Assembly										0
GCA_000457995.1	HVH 137 (4-2124971)	Denmark	95	ncbi	Assembly									sul2	1
GCA_000458555.1	HVH 170 (4-3026949)	Denmark	95	ncbi	Assembly									blaTEM-1B;sul2	2
GCA_000458685.1	HVH 180 (4-3051617)	Denmark	95	ncbi	Assembly									aadA5;sul1;blaTEM-1B;dfrA17	4
GCA_000458875.1	HVH 191 (3-9341900)	Denmark	95	ncbi	Assembly										0
GCA_000458895.1	HVH 192 (4-3054470)	Denmark	95	ncbi	Assembly										0
GCA_000459035.1	HVH 199 (4-5670322)	Denmark	95	ncbi	Assembly										0
GCA_000459075.1	HVH 201 (4-4459431)	Denmark	95	ncbi	Assembly									blaTEM-1C	1
GCA_000459115.1	HVH 203 (4-3126218)	Denmark	95	ncbi	Assembly										0
GCA_000459255.1	HVH 210 (4-3042480)	Denmark	95	ncbi	Assembly										0
GCA_000459275.1	HVH 211 (4-3041891)	Denmark	95	ncbi	Assembly										0
GCA_000459375.1	HVH 217 (4-1022806)	Denmark	95	ncbi	Assembly									tet(A);tet(A);blaTEM-1C	2
GCA_000459455.1	HVH 222 (4-2977443)	Denmark	95	ncbi	Assembly										0
GCA_000459635.1	KOEGE 32 (66a)	Denmark	95	ncbi	Assembly									sul2;strA;strB	3
GCA_000460015.1	UMEA 3041-1	Sweden	95	ncbi	Assembly										0
GCA_000460295.1	UMEA 3140-1	Sweden	95	ncbi	Assembly										0
GCA_000460775.1	UMEA 3203-1	Sweden	95	ncbi	Assembly										0
GCA_000460795.1	UMEA 3206-1	Sweden	95	ncbi	Assembly										0
GCA_000461155.1	UMEA 3298-1	Sweden	95	ncbi	Assembly										0
GCA_000461455.1	UMEA 3632-1	Sweden	95	ncbi	Assembly									strB;sul2;strA;blaTEM-1C	4
GCA_000461495.1	UMEA 3662-1	Sweden	95	ncbi	Assembly										0
GCA_000461595.1	UMEA 3702-1	Sweden	95	ncbi	Assembly										0
GCA_000461735.1	UMEA 3834-1	Sweden	95	ncbi	Assembly										0
GCA_000461775.1	UMEA 3893-1	Sweden	95	ncbi	Assembly										0
GCA_000465155.1	HVH 102 (4-6906788)	Denmark	95	ncbi	Assembly										0
GCA_000488755.1	908675	unknown	95	ncbi	Assembly									strB;blaTEM-1B;dfrA5;strA	4
GCA_000493595.1	PMV-1	unknown	95	ncbi	Assembly									sul2	1
GCA_000494955.1	HVH 12 (4-7653042)	Denmark	95	ncbi	Assembly										0
GCA_000495015.1	HVH 148 (4-3192490)	Denmark	95	ncbi	Assembly										0
GCA_000495055.1	HVH 178 (4-3189163)	Denmark	95	ncbi	Assembly									catA2;tet(D)	2
GCA_000503475.1	597	unknown	95	ncbi	Assembly									blaCMY-2;sul1;aadA1;dfrA1	4
GCA_000507665.1	HVH 214 (4-3062198)	Denmark	95	ncbi	Assembly										0
GCA_000522365.1	BIDMC 49b	USA: Boston, MA	95	ncbi	Assembly									dfrA5;tet(A)	2
GCA_000522385.1	BIDMC 49a	USA: Boston, MA	95	ncbi	Assembly									dfrA5;tet(A)	2
GCA_000613265.1	JCM 1649	unknown	95	ncbi	Assembly										0
GCA_000614505.1	JCM 20135	unknown	95	ncbi	Assembly										0
GCA_000690815.1	DSM 30083	unknown	95	ncbi	Assembly										0
GCA_000692475.1	BIDMC 65	USA: Boston	95	ncbi	Assembly										0
GCA_000734955.1	ATCC 11775	unknown	95	ncbi	Assembly										0
GCA_000742495.1	913	United Kingdom: Nottingham	95	ncbi	Assembly									blaTEM-1C;strB;strA;sul2	4
GCA_000742505.1	910	United Kingdom: Nottingham	95	ncbi	Assembly									strA;blaTEM-1C;strB;sul2	4
GCA_000742555.1	929	United Kingdom: Nottingham	95	ncbi	Assembly									sul2;blaTEM-1C;strA;strB	4
GCA_000742575.1	943	United Kingdom: Nottingham	95	ncbi	Assembly									strB;sul2;blaTEM-1C	3
GCA_000742595.1	939	United Kingdom: Nottingham	95	ncbi	Assembly									strB;sul2	2
GCA_000776195.1	upec-8	USA: WA	95	ncbi	Assembly										0
GCA_000776235.1	upec-76	USA: WA	95	ncbi	Assembly										0
GCA_000776315.1	upec-98	USA: WA	95	ncbi	Assembly										0
GCA_000776375.1	upec-73	USA: WA	95	ncbi	Assembly										0
GCA_000776475.1	upec-72	USA: WA	95	ncbi	Assembly										0
GCA_000776565.1	upec-61	USA: WA	95	ncbi	Assembly										0
GCA_000776655.1	upec-75	USA: WA	95	ncbi	Assembly										0
GCA_000776735.1	upec-94	USA: WA	95	ncbi	Assembly									dfrA5;blaTEM-1B	2
GCA_000776965.1	upec-51	USA: WA	95	ncbi	Assembly										0
GCA_000778035.1	upec-255	USA: WA	95	ncbi	Assembly										0
GCA_000778105.1	upec-250	USA: WA	95	ncbi	Assembly									blaTEM-1B;strA;sul2;strB;dfrA5	5
GCA_000778135.1	upec-249	USA: WA	95	ncbi	Assembly										0
GCA_000778465.1	upec-209	USA: WA	95	ncbi	Assembly									strB;strB;blaTEM-1C;tet(B);dfrA14;sul2;strB	5
GCA_000779425.1	upec-197	USA: WA	95	ncbi	Assembly									blaTEM-1B	1
GCA_000779495.1	blood-11-0041	USA: Pacific Northwest	95	ncbi	Assembly										0
GCA_000779695.1	upec-185	USA: WA	95	ncbi	Assembly									blaTEM-1B;dfrA5;sul2;strA;strB	5
GCA_000780095.1	upec-169	USA: WA	95	ncbi	Assembly										0
GCA_000780215.1	upec-157	USA: WA	95	ncbi	Assembly										0
GCA_000780275.1	blood-11-0031	USA: Pacific Northwest	95	ncbi	Assembly										0
GCA_000780595.1	upec-144	USA: WA	95	ncbi	Assembly									blaTEM-1B;strA;sul2;dfrA5;strB	5
GCA_000780695.1	upec-136	USA: WA	95	ncbi	Assembly										0
GCA_000780755.1	upec-139	USA: WA	95	ncbi	Assembly										0
GCA_000780875.1	upec-131	USA: WA	95	ncbi	Assembly										0
GCA_000780925.1	upec-129	USA: WA	95	ncbi	Assembly										0
GCA_000781035.1	upec-124	USA: WA	95	ncbi	Assembly										0
GCA_000781095.1	upec-120	USA: WA	95	ncbi	Assembly										0
GCA_000781385.1	upec-106	USA: WA	95	ncbi	Assembly										0
GCA_000781555.1	blood-10-0687	USA: Pacific Northwest	95	ncbi	Assembly										0
GCA_000781575.1	blood-10-0686	USA: Pacific Northwest	95	ncbi	Assembly										0
GCA_000782055.1	blood-09-0751	USA: Pacific Northwest	95	ncbi	Assembly									blaTEM-1C;strA;sul2;strB	4
GCA_000782695.1	blood-08-0654	USA: WA	95	ncbi	Assembly										0
GCA_000782735.1	blood-08-0493	USA: WA	95	ncbi	Assembly										0
GCA_000800845.2	RS218	unknown	95	ncbi	Assembly										0
GCA_000817345.1	RS218	USA: California	95	ncbi	Assembly										0
GCA_000817355.1	SCB12	USA: Oklahoma City	95	ncbi	Assembly									blaTEM-1B	1
GCA_000951755.1	Cp6salp3	Denmark	95	ncbi	Assembly										0
GCA_001021615.1	APEC O18	USA	95	ncbi	Assembly										0
GCA_001030665.1	BIDMC114	unknown	95	ncbi	Assembly										0
GCA_001052755.1	1066.rep1_ECOL	USA: WA	95	ncbi	Assembly									strA;aadA1;dfrA1;sul2;blaTEM-1B;tet(B);strB	7
GCA_001052855.1	1163_ECOL	USA: WA	95	ncbi	Assembly										0
GCA_001054095.1	121_ECOL	USA: WA	95	ncbi	Assembly										0
GCA_001056665.1	417_ECOL	USA: WA	95	ncbi	Assembly									dfrA1;aadA1;tet(B);sul2	4
GCA_001058145.1	725_ECOL	USA: WA	95	ncbi	Assembly										0
GCA_001245225.1	A192PP	United Kingdom	95	ncbi	Assembly									sul2	1
GCA_001262455.1	LSPQ A134697	Canada: Levis	95	ncbi	Assembly										0
GCA_001280325.1	SF-088	USA: San Francisco	95	ncbi	Assembly									dfrA5;blaTEM-1B;sul2;strA;strB	5
GCA_001280345.1	SF-468	USA: San Francisco	95	ncbi	Assembly		blaCTX-M-14							aac(3)-IId;blaTEM-1B;strB;blaCTX-M-14;tet(A);strA;dfrA17	7
GCA_001280385.1	SF-166	USA: San Francisco	95	ncbi	Assembly										0
GCA_001280405.1	SF-173	USA: San Francisco	95	ncbi	Assembly									blaTEM-1C;mph(A);sul1;aadA2;dfrA12	5
GCA_001306635.1	UCD-JA38	USA: Sacramento, CA	95	ncbi	Assembly									blaTEM-1B	1
GCA_001463405.1	50857972	Norway	95	ncbi	Assembly	BlaIMP-26	blaCTX-M-15							strA;armA;strB;blaCTX-M-15;sul2;tet(A);dfrA14;sul1;aacA4;dfrA5;blaIMP-26	11
GCA_001499595.1	AL505	unknown	95	ncbi	Assembly									strA;catA1;tet(A);aph(3')-Ia;sul2;strB	6
GCA_001519135.1	GN02005	USA	95	ncbi	Assembly										0
GCA_001519235.1	GN02172	USA	95	ncbi	Assembly										0
GCA_001519285.1	GN02165	USA	95	ncbi	Assembly									blaTEM-1B	1
GCA_001519555.1	GN02260	USA	95	ncbi	Assembly										0
GCA_001519715.1	GN02099	USA	95	ncbi	Assembly										0
GCA_001519735.1	GN02254	USA	95	ncbi	Assembly										0
GCA_001519755.1	GN02148	USA	95	ncbi	Assembly										0
GCA_001519895.1	GN02345	USA	95	ncbi	Assembly									sul2	1
GCA_001520195.1	GN02627	USA	95	ncbi	Assembly										0
GCA_001520775.1	GN03409	USA	95	ncbi	Assembly									blaTEM-1A	1
GCA_001520875.1	GN02476	USA	95	ncbi	Assembly										0
GCA_001521455.1	GN04262	USA	95	ncbi	Assembly										0
GCA_001521575.1	GN03324	USA	95	ncbi	Assembly										0
GCA_001524885.1	GN02609	USA	95	ncbi	Assembly									dfrA17;aadA5;aac(3)-IId;blaTEM-1B;sul1;mph(A)	6
GCA_001524905.1	GN02487	USA	95	ncbi	Assembly										0
GCA_001561835.1	F11	China	95	ncbi	Assembly									sul2;tet(B);strB;blaTEM-1B;strA	5
GCA_001571565.1	UM141	Canada: Winnipeg	95	ncbi	Assembly										0
GCA_001621085.1	GN04665	USA	95	ncbi	Assembly									aadA1;aac(3)-VIa;sul1;blaCMY-2	4
GCA_001621125.1	GN04676	USA	95	ncbi	Assembly									dfrA5;aph(3')-Ia	2
GCA_001621665.1	GN05696	USA	95	ncbi	Assembly									strB;QnrS1;strA;sul2;blaTEM-1B	5
GCA_001622105.1	GN06168	USA	95	ncbi	Assembly										0
GCA_001700095.1	018PP2015	Poland	95	ncbi	Assembly										0
GCA_001854565.1	F-18	USA	95	ncbi	Assembly									sul2	1
GCA_001877805.1	SF-452	USA:San Francisco	95	ncbi	Assembly										0
GCA_001877815.1	SF-384	USA:San Francisco	95	ncbi	Assembly										0
GCA_001881045.1	SF-501	USA:San Francisco	95	ncbi	Assembly									dfrA5;blaTEM-1B;sul2;strA;strB;tet(D)	6
GCA_001881055.1	SF-522	USA:San Francisco	95	ncbi	Assembly									sul2;strA;blaTEM-1B;strB;tet(B)	5
GCA_001881075.1	SF-626	USA:San Francisco	95	ncbi	Assembly									blaTEM-1B	1
GCA_001881105.1	SF-126	USA:San Francisco	95	ncbi	Assembly									blaTEM-1A;tet(A)	2
GCA_001881125.1	MVAST0098	USA:Minneapolis, MN	95	ncbi	Assembly										0
GCA_001881145.1	MVAST0326	USA:Minneapolis, MN	95	ncbi	Assembly										0
GCA_001881155.1	USVAST184	USA:Ann Arbor MI	95	ncbi	Assembly										0
GCA_001881165.1	USVAST267	USA:Sacramento CA	95	ncbi	Assembly										0
GCA_001881205.1	USVAST406	USA:Jackson MS	95	ncbi	Assembly									blaTEM-1B	1
GCA_001881225.1	SF-491	USA:San Francisco	95	ncbi	Assembly										0
GCA_001881235.1	SF-495	USA:San Francisco	95	ncbi	Assembly										0
GCA_001881245.1	SF-518	USA:San Francisco	95	ncbi	Assembly										0
GCA_001881305.1	SF-560	USA:San Francisco	95	ncbi	Assembly										0
GCA_001881315.1	SF-567	USA:San Francisco	95	ncbi	Assembly										0
GCA_001881345.1	SF-596	USA:San Francisco	95	ncbi	Assembly									mph(A);tet(A);strB;strA;sul2;blaTEM-1B;sul1;aadA5;dfrA17	9
GCA_001881355.1	SF-572	USA:San Francisco	95	ncbi	Assembly										0
GCA_001881385.1	SF-095	USA:San Francisco	95	ncbi	Assembly										0
GCA_001881395.1	MVAST0176	USA:Minneapolis, MN	95	ncbi	Assembly									blaTEM-1B	1
GCA_001881425.1	MVAST0234	USA:Minneapolis, MN	95	ncbi	Assembly										0
GCA_001881435.1	USVAST245	USA:Seattle WA	95	ncbi	Assembly										0
GCA_001881465.1	USVAST356	USA:Dallas TX	95	ncbi	Assembly									blaTEM-1B	1
GCA_002001665.1	22.1-R1	Australia: Sydney	95	ncbi	Assembly									sul3;blaTEM-1B;tet(B);aadA1;cmlA1;aadA2;dfrA12	7
GCA_002001685.1	1.10-R8	Australia: Sydney	95	ncbi	Assembly									dfrA5;sul1;tet(B)	3
GCA_002001745.1	14.2-R2	Australia: Sydney	95	ncbi	Assembly									blaTEM-1C	1
GCA_002002315.1	3-S1R	Australia: Sydney	95	ncbi	Assembly									blaTEM-1C	1
GCA_002024865.1	NU14	USA	95	ncbi	Assembly										0
GCA_002028665.1	SF-001	USA: San Francisco	95	ncbi	Assembly									blaTEM-1A	1
GCA_002028705.1	SF-083	USA: San Francisco	95	ncbi	Assembly										0
GCA_002028715.1	SF-075	USA: San Francisco	95	ncbi	Assembly									tet(A)	1
GCA_002028745.1	SF-149	USA: San Francisco	95	ncbi	Assembly									blaTEM-1B	1
GCA_002028755.1	SF-151	USA: San Francisco	95	ncbi	Assembly									strA;sul2;tet(A);strB;blaTEM-1B;dfrA5	6
GCA_002028785.1	SF-239	USA: San Francisco	95	ncbi	Assembly										0
GCA_002028795.1	SF-264	USA: San Francisco	95	ncbi	Assembly									mph(A);tet(A);aac(3)-IId;dfrA17;aadA5;sul1;aadA2;aadA1;dfrA12;catA1;blaTEM-1B	11
GCA_002028825.1	SF-305	USA: San Francisco	95	ncbi	Assembly									blaTEM-1B	1
GCA_002028835.1	SF-269	USA: San Francisco	95	ncbi	Assembly									blaTEM-1B	1
GCA_002028865.1	SF-313	USA: San Francisco	95	ncbi	Assembly										0
GCA_002028875.1	SF-335	USA: San Francisco	95	ncbi	Assembly									blaTEM-1B	1
GCA_002028905.1	SF-356	USA: San Francisco	95	ncbi	Assembly										0
GCA_002028915.1	SF-362	USA: San Francisco	95	ncbi	Assembly									blaTEM-1B	1
GCA_002028945.1	SF-194	USA: San Francisco	95	ncbi	Assembly									tet(A);catA1;blaTEM-1B;aadA1;sul1	5
GCA_002028955.1	SF-094	USA: San Francisco	95	ncbi	Assembly									blaTEM-1B	1
GCA_002028965.1	SF-231	USA: San Francisco	95	ncbi	Assembly									tet(B);sul1;aadA5;dfrA17;strB;strA;sul2;blaTEM-1B	8
GCA_002029005.1	SF-371	USA: San Francisco	95	ncbi	Assembly									blaTEM-1B	1
GCA_002029015.1	SF-380	USA: San Francisco	95	ncbi	Assembly										0
GCA_002029025.1	SF-403	USA: San Francisco	95	ncbi	Assembly										0
GCA_002029035.1	SF-383	USA: San Francisco	95	ncbi	Assembly										0
GCA_002029085.1	SF-421	USA: San Francisco	95	ncbi	Assembly										0
GCA_002029095.1	SF-423	USA: San Francisco	95	ncbi	Assembly										0
GCA_002029115.1	SF-425	USA: San Francisco	95	ncbi	Assembly										0
GCA_002029145.1	SF-457	USA: San Francisco	95	ncbi	Assembly										0
GCA_002029165.1	SF-440	USA: San Francisco	95	ncbi	Assembly										0
GCA_002087535.1	OS_09_006_-1	USA: MO	95	ncbi	Assembly									blaTEM-1B;sul2;strA;strB;tet(A);dfrA1;aadA1	7
GCA_002087735.1	OS_02_035_15	USA: MO	95	ncbi	Assembly										0
GCA_002109575.1	R527	unknown	95	ncbi	Assembly										0
GCA_002109685.1	H413	unknown	95	ncbi	Assembly										0
GCA_002109765.1	H305	unknown	95	ncbi	Assembly										0
GCA_002109775.1	H296	unknown	95	ncbi	Assembly									aadA1;sul1;blaTEM-1B	3
GCA_002110165.1	H461	unknown	95	ncbi	Assembly									blaTEM-1C;tet(A)	2
GCA_002163195.1	MGH164	USA: Massachusetts, Boston	95	ncbi	Assembly										0
GCA_002166335.1	31.3r	USA: WA, Seattle	95	ncbi	Assembly										0
GCA_002166345.1	34.1a	USA: WA, Seattle	95	ncbi	Assembly										0
GCA_002166405.1	34.2r	USA: WA, Seattle	95	ncbi	Assembly										0
GCA_002166615.1	5.2p	USA: WA, Seattle	95	ncbi	Assembly										0
GCA_002166625.1	5.3r	USA: WA, Seattle	95	ncbi	Assembly										0
GCA_002244125.1	228-2945	USA: Seattle	95	ncbi	Assembly										0
GCA_002244165.1	228-2998	USA: Seattle	95	ncbi	Assembly										0
GCA_002285755.1	PA45B	Australia: Brisbane	95	ncbi	Assembly									aadA1;sul1;blaTEM-1B	3
GCA_002416845.1	ST-95:E040	South Africa:Pretoria	95	ncbi	Assembly		blaCTX-M-14							sul2;fosA;aph(3')-IIa;aadA1;sul3;dfrA5;cmlA1;blaCTX-M-14;aadA2;blaTEM-1B;strA;strB	12
GCA_002442025.1	25_Esco_HA-NL	Netherlands	95	ncbi	Assembly		blaCTX-M-3							sul2;strB;blaTEM-1B;blaCTX-M-3;strA;fosA	6
GCA_002456255.1	MOD1-EC723	USA: WA	95	ncbi	Assembly										0
GCA_002456335.1	MOD1-EC715	USA: WA	95	ncbi	Assembly										0
GCA_002456585.1	MOD1-EC678	USA: WA	95	ncbi	Assembly										0
GCA_002456625.1	MOD1-EC677	USA: WA	95	ncbi	Assembly										0
GCA_002461695.1	MOD1-EC1389	unknown	95	ncbi	Assembly										0
GCA_002462915.1	MOD1-EC6794	USA: PA	95	ncbi	Assembly										0
GCA_002465215.1	MOD1-EC721	USA: WA	95	ncbi	Assembly										0
GCA_002465675.1	MOD1-EC728	USA: WA	95	ncbi	Assembly										0
GCA_002465755.1	MOD1-EC696	USA: WA	95	ncbi	Assembly									sul1;dfrA10;sul1;aadB	3
GCA_002465875.1	MOD1-EC674	USA: WA	95	ncbi	Assembly										0
GCA_002465905.1	MOD1-EC670	USA: WA	95	ncbi	Assembly										0
GCA_002465935.1	MOD1-EC669	USA: WA	95	ncbi	Assembly									sul1;aadA2	2
GCA_002465975.1	MOD1-EC587	unknown	95	ncbi	Assembly										0
GCA_002466185.1	MOD1-EC417	USA	95	ncbi	Assembly										0
GCA_002466255.1	MOD1-EC402	USA	95	ncbi	Assembly										0
GCA_002466865.1	MOD1-EC690	USA: WA	95	ncbi	Assembly										0
GCA_002469425.1	MOD1-EC665	USA: WA	95	ncbi	Assembly										0
GCA_002484905.1	MOD1-EC6651	Saudi Arabia	95	ncbi	Assembly									tet(A)	1
GCA_002512925.1	MOD1-EC6113	USA: PA	95	ncbi	Assembly										0
GCA_002517085.1	MOD1-EC5197	USA: TX	95	ncbi	Assembly										0
GCA_002517265.1	MOD1-EC5284	USA: PA	95	ncbi	Assembly										0
GCA_002517335.1	MOD1-EC5349	USA: ND	95	ncbi	Assembly										0
GCA_002520535.1	MOD1-EC6853	USA: FL	95	ncbi	Assembly										0
GCA_002520825.1	MOD1-EC6834	USA: MI	95	ncbi	Assembly										0
GCA_002521585.1	MOD1-EC6695	USA: MA	95	ncbi	Assembly										0
GCA_002522565.1	MOD1-EC6705	USA: TX	95	ncbi	Assembly										0
GCA_002538735.1	MOD1-EC5969	USA:PA	95	ncbi	Assembly									strB;sul2;mph(A);aph(3')-Ic;tet(B);dfrA12;aadA2;sul1;strA	9
GCA_002541795.1	MOD1-EC6049	Norway	95	ncbi	Assembly										0
GCA_002547305.1	MOD1-EC5957	USA:WI	95	ncbi	Assembly										0
GCA_002548265.1	MOD1-EC5860	USA:FL	95	ncbi	Assembly										0
GCA_002631405.1	25b_Esco_HA-NL	Netherlands	95	ncbi	Assembly		blaCTX-M-3							strB;blaTEM-1B;fosA;blaCTX-M-3;sul2;strA	6
GCA_002761595.1	ABU 9	Hungary	95	ncbi	Assembly										0
GCA_002761605.1	ABU 91	Hungary	95	ncbi	Assembly										0
GCA_002761615.1	ABU 106	Hungary	95	ncbi	Assembly										0
GCA_002810185.1	K56-68	Sweden	95	ncbi	Assembly										0
GCA_002844685.1	ExPEC XM	China:Shandong	95	ncbi	Assembly									strB;strA;tet(A);tet(A)	3
GCA_002846135.1	MS8345	Qatar	95	ncbi	Assembly									sul1;dfrA7;tet(X);sul1;aadA1;sul1;aadA1;erm(B);blaTEM-1B;sul2;strA;strB;tet(A);dfrA1;aadA1;erm(B);aadA1;sul1;ARR-3;ere(A);aadA1;aac(3)-IIa;strA;strB;blaTEM-1B;mph(A);mcr-1.1	16
GCA_002887005.1	YDC595	USA: Pennsylvania	95	ncbi	Assembly	blaKPC-2								blaTEM-1B;blaKPC-2	2
GCA_002909465.1	41334	Denmark	95	ncbi	Assembly									sul2	1
GCA_002911215.1	A92	USA	95	ncbi	Assembly										0
GCA_002911225.1	Cp4Salp37	Denmark	95	ncbi	Assembly									strA;strB;sul2;blaTEM-1B;dfrA8	5
GCA_002911255.1	H2S5	Denmark	95	ncbi	Assembly										0
GCA_002911265.1	A351	USA	95	ncbi	Assembly										0
GCA_002911295.1	H1S10	Denmark	95	ncbi	Assembly										0
GCA_002911315.1	Cp6Salp8	Denmark	95	ncbi	Assembly										0
GCA_002911325.1	A359	USA	95	ncbi	Assembly										0
GCA_002911335.1	A369	USA	95	ncbi	Assembly										0
GCA_002911375.1	A52	USA	95	ncbi	Assembly									tet(C);sul1;aac(3)-VIa;aadA1	4
GCA_002911395.1	96T	Germany	95	ncbi	Assembly										0
GCA_002911415.1	8F	France	95	ncbi	Assembly									tet(B)	1
GCA_002911435.1	43285	Denmark	95	ncbi	Assembly									sul2	1
GCA_002930325.1	DP254	Netherlands: Breda	95	ncbi	Assembly		blaCTX-M-1							sul2;aadA5;dfrA17;blaCTX-M-1	4
GCA_002953435.1	HS13-1	China:Shenzhen	95	ncbi	Assembly									tet(A);aadA1;cmlA1;aadA2;dfrA12;sul1;floR;oqxB;oqxA;QnrS2;aac(6')Ib-cr;blaOXA-1;catB3;ARR-3;sul1;tet(A);aph(3')-Ia;blaCMY-2;tet(M);mef(B);mph(A);sul3;mcr-1.1	21
GCA_003020885.1	MS7163	Slovakia	95	ncbi	Assembly									sul2;dfrA14;strB	3
GCA_003027635.1	20441-1	USA:MI	95	ncbi	Assembly										0
GCA_003146555.1	Aut2013_WWKa_ALT_17	Germany: Dresden-Kaditz	95	ncbi	Assembly										0
GCA_003153995.1	Win2012_WWKa_OUT_34	Germany: Dresden-Kaditz	95	ncbi	Assembly									aadA1	1
GCA_003176575.1	TUM9589	unknown	95	ncbi	Assembly		blaCTX-M-24							floR;strB;strA;blaCTX-M-24;fosA	5
GCA_000179095.1	MS 79-10	unknown	101	ncbi	Assembly				frameshift	frameshift		S80I/E84		aac(3)-VIa;aadA1;mph(A);dfrA14;blaTEM-1B;catA1;sul1	7
GCA_000179175.1	MS 107-1	unknown	101	ncbi	Assembly				recombined	frameshift	S83L/D87Y	S80I/E84		aac(3)-VIa;aadA1;blaTEM-1B;mph(A);catA1;sul1;dfrA14	7
GCA_000326645.1	KTE90	unknown	101	ncbi	Assembly										0
GCA_000352485.1	KTE91	Denmark	101	ncbi	Assembly										0
GCA_000352885.1	KTE184	unknown	101	ncbi	Assembly								Redundant		0
GCA_000488035.1	HVH 98 (4-5799287)	Denmark	101	ncbi	Assembly									dfrA1;sul1;aadA1	3
GCA_000700345.1	3-267-03_S3_C2	Tanzania	101	ncbi	Assembly										0
GCA_000779655.1	blood-2011-0240	USA: Pacific Northwest	101	ncbi	Assembly					frameshift	S83L/D87Y	S80I/E84	Redundant	tet(A);tet(A);tet(A);strB;blaCMY-2;blaCMY-2;strA;sul2;blaTEM-1B;floR;tet(A);blaTEM-1B;aph(3')-Ia	8
GCA_000780075.1	blood-2011-0238	USA: Pacific Northwest	101	ncbi	Assembly					frameshift	S83L/D87Y	S80I/E84		tet(A);tet(A);tet(A);strB;blaCMY-2;strA;blaCMY-2;sul2;blaTEM-1B;floR;blaTEM-1B;aph(3')-Ia	8
GCA_000780895.1	upec-130	USA: WA	101	ncbi	Assembly										0
GCA_000781735.1	blood-10-0065	USA: Pacific Northwest	101	ncbi	Assembly									tet(B);sul2;strB;strA	4
GCA_000781755.1	blood-10-0040	USA: Pacific Northwest	101	ncbi	Assembly								Redundant	strB;sul2;strA;tet(B)	4
GCA_000781775.1	blood-10-0038	USA: Pacific Northwest	101	ncbi	Assembly								Redundant	tet(B);sul2;strB;strA	4
GCA_000798295.1	CVM N33651PS	USA	101	ncbi	Assembly									floR;tet(A);strB;strA;sul2	5
GCA_000798395.1	CVM N34543PS	USA	101	ncbi	Assembly									floR;sul2;aph(3')-Ic;tet(B);strB;strA	6
GCA_000806195.1	912	Denmark	101	ncbi	Assembly									sul2;tet(X);strA;aph(4)-Ia;strB;aac(3)-IVa;blaTEM-1A	7
GCA_001268545.1	YS river water	unknown	101	ncbi	Assembly									catA1;sul2;sul1;strA;strB;aadA5;aph(3')-Ic;blaTEM-1B;tet(B);dfrA17	10
GCA_001268705.1	YS river water	unknown	101	ncbi	Assembly									sul2;aph(3')-Ic;tet(B);strB;strA	5
GCA_001268885.1	chicken fecal	unknown	101	ncbi	Assembly									mph(B);tet(A);aph(3')-Ic;sul1;dfrA14;blaTEM-1B;strB;strA;sul2;aadA1;aadB	11
GCA_001268965.1	chicken fecal	unknown	101	ncbi	Assembly								Redundant	blaTEM-1B;tet(A);aph(3')-Ic;strB;mph(B);strA;sul1;aadA1;aadB;dfrA14;sul2	11
GCA_001420165.1	449	Tanzania	101	ncbi	Assembly										0
GCA_001463535.1	50673720	Norway	101	ncbi	Assembly	blaNDM-7	blaCTX-M-15	YRIN - E349K-I532L	recombined	frameshift	S83L/D87N	S80I/E84		aac(6')Ib-cr;aac(3)-IIa;blaNDM-7;tet(B);catA1;blaCTX-M-15;blaOXA-1	7
GCA_001607295.1	STEC 2359	Netherlands	101	ncbi	Assembly									sul2;strA;strB;blaTEM-1B;tet(A)	5
GCA_001659805.1	015PP2015	Poland	101	ncbi	Assembly										0
GCA_001660545.3	ICBEC72H	Brazil: unknowntal	101	ncbi	Assembly		blaCTX-M-8							blaCTX-M-8;mcr-1.1	2
GCA_001713555.1	NA099	India: Pune	101	ncbi	Assembly	blaNDM-1	blaCTX-M-15	YRIN - I532L	recombined	frameshift	S83L/D87N	S80I/E84		rmtC;blaCTX-M-15;blaOXA-2;blaCMY-6;tet(A);sul1;catA1;aac(3)-IIa;blaNDM-1;aac(3)-IId;strA;aacA4;dfrA29;strB;blaOXA-1	15
GCA_001713575.1	NA086	India: Pune	101	ncbi	Assembly	blaNDM-1	blaCTX-M-15	YRIN - I532L	recombined	frameshift	S83L/D87N	S80I/E84		blaCTX-M-15;blaOXA-2;rmtC;tet(A);sul1;catA1;aac(3)-IIa;aacA4;blaNDM-1;blaOXA-1;dfrA29;aph(3')-VIa	12
GCA_001713585.1	NA084	India: Pune	101	ncbi	Assembly	blaNDM-1	blaCTX-M-15	YRIN - I532L	recombined	frameshift	S83L/D87N	S80I/E84	Redundant	rmtC;blaCTX-M-15;blaOXA-2;sul1;catA1;tet(A);aac(3)-IIa;aacA4;aacA4;blaNDM-1;blaOXA-1;dfrA29;aph(3')-VIa	12
GCA_001748695.1	AF84	Israel	101	ncbi	Assembly										0
GCA_001874845.1	AR_0048	unknown	101	ncbi	Assembly	blaNDM-1	blaCTX-M-15	YRIN - E349K-I532L	recombined	frameshift	S83L/D87N	S80I/E84		blaCTX-M-15;tet(B);blaCTX-M-15;blaTEM-1A;strA;strB;sul1;blaOXA-2;dfrA29;catA1;blaCMY-6;blaCTX-M-15;aacA4;sul1;blaTEM-1B;rmtC;aph(3')-Ia;blaNDM-1;sul1;aadA2;dfrA12	17
GCA_001891215.1	587	China: Shandong	101	ncbi	Assembly	blaNDM-1		YRIN - E349K-I532L	recombined	frameshift	S83L/D87N	S80I/E84	Redundant	sul2;aph(3')-Ia;rmtB;fosA;blaTEM-1B;blaCMY-2;blaNDM-5;sul1;catA1;dfrA12;aadA2;floR;dfrA14;aph(4)-Ia;tet(A);aac(3)-IVa;erm(B);strB;mph(A);strA	20
GCA_001891225.1	616	China: Shandong	101	ncbi	Assembly	blaNDM-1		YRIN - E349K-I532L	recombined	frameshift	S83L/D87N	S80I/E84	Redundant	dfrA12;rmtB;aph(3')-Ia;blaCMY-2;blaNDM-5;fosA;blaTEM-1B;sul1;catA1;mph(A);aadA2;sul2;strA;dfrA14;strB;aph(4)-Ia;aac(3)-IVa;tet(A);erm(B);floR	20
GCA_001891235.1	674	China: Shandong	101	ncbi	Assembly	blaNDM-5		YRIN - E349K-I532L	recombined	frameshift	S83L/D87N	S80I/E84	Redundant	sul2;aph(4)-Ia;aph(3')-Ia;sul1;blaNDM-5;rmtB;dfrA12;dfrA14;erm(B);mph(A);blaTEM-1B;aadA2;fosA;catA1;floR;tet(A);aac(3)-IVa;strB;blaCMY-2;strA	20
GCA_001891285.1	446	China: Shandong	101	ncbi	Assembly	blaNDM-5	blaCTX-M-65	YRIN - E349K-I532L	recombined	frameshift	S83L/D87N	S80I/E84	Redundant	dfrA14;blaCMY-2;erm(B);blaCTX-M-65;sul2;aadA22;tet(A);blaNDM-5;aph(3')-Ia;catA1;floR;aac(3)-IId;sul1;mph(A);rmtB;aadA16;fosA;dfrA27;ARR-3;aac(6')Ib-cr;strB;strA	22
GCA_001891305.1	576	China: Shandong	101	ncbi	Assembly	blaNDM-9		YRIN - E349K-I532L	recombined	frameshift	S83L/D87N	S80I/E84		sul1;tet(A);strB;blaTEM-1B;blaCMY-2;aph(3')-Ia;catA1;fosA;mph(A);rmtB;erm(T);floR;blaNDM-9;aac(3)-IVa;dfrA12;strA;sul2	17
GCA_001891365.1	450	China: Shandong	101	ncbi	Assembly	blaNDM-5		YRIN - E349K-I532L	recombined	frameshift	S83L/D87N	S80I/E84		catA1;strB;erm(T);aph(3')-Ia;sul2;aadA2;blaCMY-2;blaNDM-5;floR;dfrA14;mph(A);tet(A);strA	13
GCA_001891545.1	457	China: Shandong	101	ncbi	Assembly	blaNDM-9	blaCTX-M-55	YRIN - E349K-I532L		frameshift	S83L/D87Y	S80I/E84		sul2;aph(3')-Ia;ARR-3;blaCMY-2;aac(3)-IId;sul1;tet(M);aadA22;blaTEM-1B;dfrA14;erm(B);dfrA27;fosA;floR;mph(A);tet(A);aadA16;blaNDM-9;blaCTX-M-55;aac(6')Ib-cr;rmtB;strB;strA	23
GCA_001891605.1	623	China: Shandong	101	ncbi	Assembly	blaNDM-9	blaCTX-M-55	YRIN - E349K-I532L		frameshift	S83L/D87Y	S80I/E84		dfrA27;strA;ARR-3;blaNDM-9;blaCMY-2;fosA;rmtB;tet(M);strB;dfrA12;aph(3')-Ia;dfrA14;sul1;aadA22;aadA16;sul2;erm(B);blaCTX-M-55;aac(3)-IId;tet(A);dfrA17;mph(A);blaTEM-1B;floR	24
GCA_001891655.1	481	China: Shandong	101	ncbi	Assembly	blaNDM-5	blaCTX-M-14	YRIN - E349K-I532L	recombined	frameshift	S83L/D87N	S80I/E84		blaCMY-2;aph(3')-Ia;tet(M);tet(A);blaNDM-5;fosA;sul2;catA1;strA;floR;dfrA14;strB;blaCTX-M-14;erm(T);aadA22;mph(A)	16
GCA_001891685.1	578	China: Shandong	101	ncbi	Assembly	blaNDM-5		YRIN - E349K-I532L	recombined	frameshift	S83L/D87N	S80I/E84		sul2;fosA;blaCMY-2;blaNDM-5;rmtB;mph(A);blaTEM-1B;catA1;floR;dfrA14;tet(A);sul1;aadA2;erm(B);strB;strA	16
GCA_001892215.1	694	China: Shandong	101	ncbi	Assembly	blaNDM-5		YRIN - E349K-I532L	recombined	frameshift	S83L/D87N	S80I/E84		aph(3')-Ia;blaCMY-2;blaNDM-5;sul1;mph(A);rmtB;floR;dfrA12;dfrA14;blaTEM-1B;aadA2;fosA;sul2;strA;catA1;strB;aph(4)-Ia;aac(3)-IVa;erm(B);tet(A)	20
GCA_001892245.1	447	China: Shandong	101	ncbi	Assembly	blaNDM-5	blaCTX-M-65	YRIN - E349K-I532L	recombined	frameshift	S83L/D87N	S80I/E84		tet(A);ARR-3;aph(3')-Ia;blaCMY-2;dfrA27;strB;aadA22;aac(3)-IId;blaNDM-5;aadA16;catA1;dfrA14;erm(B);sul1;sul2;rmtB;aac(6')Ib-cr;mph(A);blaCTX-M-65;fosA;floR;strA	22
GCA_001892255.1	558	China: Shandong	101	ncbi	Assembly	blaNDM-9	blaCTX-M-55	YRIN - E349K-I532L		frameshift	S83L/D87Y	S80I/E84		dfrA17;ARR-3;strA;blaCTX-M-55;aph(3')-Ia;rmtB;aadA22;strB;tet(M);sul1;blaNDM-9;erm(B);aac(3)-IId;fosA;dfrA27;sul2;tet(A);mph(A);floR;aadA16;aac(6')Ib-cr;blaCMY-2	22
GCA_001892275.1	453	China: Shandong	101	ncbi	Assembly	blaNDM-5		YRIN - E349K-I532L	recombined	frameshift	S83L/D87N	S80I/E84		strB;dfrA14;aph(3')-Ia;erm(T);sul2;tet(A);strA;blaNDM-5;catA1;fosA;floR;sul1;rmtB;aac(3)-IVa;mph(A);blaTEM-1B;blaCMY-2	17
GCA_001892425.1	460	China: Shandong	101	ncbi	Assembly	blaNDM-9	blaCTX-M-55	YRIN - E349K-I532L		frameshift	S83L/D87Y	S80I/E84	Redundant	dfrA27;aph(3')-Ia;strA;blaCMY-2;rmtB;aadA22;fosA;aac(3)-IId;strB;blaTEM-1B;dfrA14;aadA16;sul2;erm(B);sul1;blaCTX-M-55;ARR-3;tet(A);tet(M);floR;blaNDM-9;aac(6')Ib-cr;mph(A)	23
GCA_001892605.1	557	China: Shandong	101	ncbi	Assembly	blaNDM-5		YRIN - E349K-I532L	recombined	frameshift	S83L/D87N	S80I/E84	Redundant	strB;erm(B);sul2;blaNDM-5;blaCMY-2;rmtB;tet(A);dfrA14;aadA22;floR;mph(A);erm(T);ARR-3;catA1;aph(3')-Ia;sul1;blaTEM-1B;strA	18
GCA_001894155.1	513	China: Shandong	101	ncbi	Assembly	blaNDM-5		YRIN - E349K-I532L	recombined	frameshift	S83L/D87N	S80I/E84	Redundant	aph(3')-Ia;strB;erm(B);sul2;blaNDM-5;mph(A);catA1;aadA22;erm(T);floR;dfrA14;blaCMY-2;blaTEM-1B;tet(A);strA	15
GCA_001894495.1	443	China: Shandong	101	ncbi	Assembly	blaNDM-5	blaCTX-M-65	YRIN - E349K-I532L	recombined	frameshift	S83L/D87N	S80I/E84		aph(3')-Ia;catA1;tet(A);blaNDM-5;blaTEM-1B;sul2;strA;floR;blaCTX-M-65;dfrA14;strB;fosA;mph(A);rmtB	14
GCA_001900815.1	H3	unknown	101	ncbi	Assembly									tet(A);aph(3')-IIa;floR;dfrA14;aadA1;blaOXA-10;cmlA1;ARR-3;QnrS1	9
GCA_001990865.1	K30	Germany: Munich	101	ncbi	Assembly										0
GCA_002011945.1	Ecol_224	vietnam: Hanoi	101	ncbi	Assembly	blaKPC-2	blaCTX-M-14/blaCTX-M-15	YRIN - I532L	recombined	frameshift	S83L/D87N	S80I/E84		aadA16;sul1;blaCTX-M-14;dfrA27;blaCTX-M-14;ARR-3;blaKPC-2;aac(6')Ib-cr;blaCTX-M-15;catA1;tet(B)	10
GCA_002055635.1	AR_0118	unknown	101	ncbi	Assembly	blaNDM-1		YRIN - I532L	recombined	frameshift	S83L/D87N	S80I/E84		blaCMY-6;catA1;dfrA29;blaOXA-2;sul1;strB;strA;aac(3)-IIa;blaTEM-1A;blaNDM-1;rmtC;sul1;aacA4	12
GCA_002152115.1	BWH68	USA: Massachusetts	101	ncbi	Assembly	blaNDM-5		YRIN - E349K-I532L	recombined	frameshift	S83L/D87N	S80I/E84		sul2;aac(6')Ib-cr;ARR-3;dfrA27;aadA16;sul1;rmtB;blaTEM-1B;tet(A);aac(3)-IId;blaTEM-1B;blaNDM-5;sul2;floR;aph(3')-Ia;mph(A);dfrA14;catA1;dfrA14;strB;strA	18
GCA_002163655.1	KSC9	USA	101	ncbi	Assembly									tet(B)	1
GCA_002164915.1	SCEC020068	China: Sichuan	101	ncbi	Assembly	blaNDM-5	blaCTX-M-55/blaCTX-M-14	YRIN - E349K-I532L	recombined	frameshift	S83L/D87N	S80I/E84		aph(4)-Ia;strA;aac(3)-IVa;mph(A);aadA2;sul2;tet(A);aph(3')-Ia;blaNDM-5;fosA;cmlA1;tet(M);strB;floR;aadA1;blaCTX-M-14;dfrA14;blaCTX-M-55;sul3;catA1;mcr-1.1	21
GCA_002180095.1	AR_0149	unknown	101	ncbi	Assembly	blaNDM-1	blaCTX-M-15	YRIN - I532L	recombined	frameshift	S83L/D87N	S80I/E84		blaCTX-M-15;aac(3)-IIa;blaCTX-M-15;aacA4;sul1;blaTEM-1B;blaCMY-6;blaNDM-1;sul1;blaCTX-M-15;rmtC;blaOXA-1;aac(6')Ib-cr;aac(6')-Ib;aadA1;blaOXA-9;catA1;dfrA29;blaOXA-2;sul1;strB;strA;aac(3)-IIa;blaTEM-1A	19
GCA_002180275.1	AR_0128	unknown	101	ncbi	Assembly	blaNDM-1		YRIN - I532L	recombined	frameshift	S83L/D87N	S80I/E84	Redundant	blaNDM-1;catA1;dfrA29;blaOXA-2;sul1;strB;strA;aac(3)-IIa;blaTEM-1A;rmtC;sul1;aacA4;blaCMY-6	12
GCA_002223845.1	CoR-4	China: Hangzhou	101	ncbi	Assembly										0
GCA_002226065.1	MOD1-EC5732	USA:PA	101	ncbi	Assembly									sul2;blaTEM-1B;aph(3')-Ic;tet(B);strB;strA	6
GCA_002226865.1	MOD1-EC5685	USA:PA	101	ncbi	Assembly								Redundant	sul2;tet(B);aph(3')-Ic;strB;strA	5
GCA_002228655.1	MOD1-EC5541	USA:CO	101	ncbi	Assembly									tet(C)	1
GCA_002230925.1	MOD1-EC5269	USA:OK	101	ncbi	Assembly									strB;sul2;aph(3')-Ic;strA;tet(B);blaTEM-1B	6
GCA_002231955.1	MOD1-EC5104	USA:MO	101	ncbi	Assembly									tet(B)	1
GCA_002233315.1	MOD1-EC5046	USA:IA	101	ncbi	Assembly								Redundant	sul2;strA;tet(B);strB;aph(3')-Ic	5
GCA_002233395.1	MOD1-EC5036	USA:PA	101	ncbi	Assembly									sul2;strA;tet(B);strB;aph(3')-Ic	5
GCA_002243975.1	67-1294	USA: Seattle	101	ncbi	Assembly									tet(B);strA;strB;aph(3')-Ic;sul2	5
GCA_002283355.1	GMR-RA-432.16	Colombia: Antioquia	101	ncbi	Assembly								Redundant	blaTEM-1B;tet(A);QnrB19;mcr-1.1	4
GCA_002283695.1	GMR-RA-381.16	Colombia: Antioquia	101	ncbi	Assembly									tet(A);blaTEM-1B;QnrB19;mcr-1.1	4
GCA_002324805.1	KCJK4405	USA: FL	101	ncbi	Assembly		blaCTX-M-1							mph(A);sul2;blaCTX-M-1	3
GCA_002459785.1	MOD1-EC1681	Canada	101	ncbi	Assembly									sul2;aadA1;sul1;tet(A)	4
GCA_002460775.1	MOD1-EC1635	Canada	101	ncbi	Assembly									tet(B)	1
GCA_002463355.1	MOD1-EC6196	USA: OK	101	ncbi	Assembly										0
GCA_002464405.1	MOD1-EC6482	India	101	ncbi	Assembly								Redundant	catA1;mph(A);tet(A);blaTEM-1B;dfrA14;strB;sul2	7
GCA_002464515.1	MOD1-EC5265	China	101	ncbi	Assembly						S83L/D87N	S80I/E84		blaTEM-1B;sul3;aadA2;cmlA1;dfrA12;tet(B);qepA;rmtB	8
GCA_002464595.1	MOD1-EC5257	China	101	ncbi	Assembly						S83L/D87	S80R/E84		dfrA17;aadA5;aph(3')-Ia;oqxB;sul2;oqxA;tet(A);blaTEM-1B;strB;strA	10
GCA_002464615.1	MOD1-EC5253	China	101	ncbi	Assembly					frameshift	S83L/D87Y	S80I/E84		aph(3')-Ia;blaTEM-1B;qepA;sul1;mph(A);tet(B);dfrB4;aac(3)-IId;dfrA14;catA1;tet(A)	11
GCA_002465305.1	MOD1-EC710	USA: WA	101	ncbi	Assembly									aph(3')-Ib;aac(3)-IIa;blaOXA-2;tet(A);sul1	5
GCA_002467995.1	MOD1-EC6921	USA: PA	101	ncbi	Assembly									strA;strB;tet(B)	3
GCA_002474655.1	MOD1-EC5334	Mexico	101	ncbi	Assembly						S83L/D87N	S80I/E84		oqxB;dfrA14;sul3;tet(A);oqxA;sul2;aadA1;strB;cmlA1;aadA2	10
GCA_002475125.1	MOD1-EC5137	USA: NY	101	ncbi	Assembly										0
GCA_002475375.1	MOD1-EC5043	Mexico	101	ncbi	Assembly						S83L/D87G	S80I/E84		tet(B);strB;strA;aadA1;dfrA1;sul2	6
GCA_002485685.1	MOD1-EC6477	India	101	ncbi	Assembly									sul2;strA;tet(A);strB	4
GCA_002485915.1	MOD1-EC6455	USA: PA	101	ncbi	Assembly									tet(B)	1
GCA_002486855.1	MOD1-EC6313	USA: IA	101	ncbi	Assembly									sul2;aph(3')-Ic;tet(B);strB;strA	5
GCA_002510415.1	MOD1-EC6536	USA: IL	101	ncbi	Assembly						S83A/D87			tet(A);catA1;blaTEM-1B;strB;dfrA14;strA;mph(A)	7
GCA_002510495.1	MOD1-EC6525	India	101	ncbi	Assembly									sul2;strB;strA	3
GCA_002511055.1	MOD1-EC6370	USA: NE	101	ncbi	Assembly									tet(C);tet(B);sul2;aph(3')-Ic;blaTEM-1B;strB;sul1;strA;aadA1;catA1	10
GCA_002511195.1	MOD1-EC6353	USA: TX	101	ncbi	Assembly										0
GCA_002511585.1	MOD1-EC6297	USA: DE	101	ncbi	Assembly										0
GCA_002512115.1	MOD1-EC6479	USA: KY	101	ncbi	Assembly									mph(A);catA1;sul2;blaTEM-1B;strB;dfrA14;tet(A)	7
GCA_002512785.1	MOD1-EC6299	USA: IA	101	ncbi	Assembly										0
GCA_002513115.1	MOD1-EC6527	India	101	ncbi	Assembly									catA1;mph(A);dfrA14;strB;strA	5
GCA_002513145.1	MOD1-EC6523	India	101	ncbi	Assembly									mph(A);strA;aph(3')-Ia;catA1;dfrA14;strB	6
GCA_002513175.1	MOD1-EC6519	India	101	ncbi	Assembly									strA;tet(A);aadA1;strB;sul2;aph(3')-Ia;blaTEM-1B;catA1;floR;dfrA1;sul1	11
GCA_002513925.1	MOD1-EC6373	USA: PA	101	ncbi	Assembly									aadA1;blaTEM-1B;catA1;tet(C);sul1	5
GCA_002514465.1	MOD1-EC5936	USA: PA	101	ncbi	Assembly									sul2;tet(B);blaTEM-1B;aph(3')-Ic;strB;strA	6
GCA_002518525.1	MOD1-EC6991	USA: CO	101	ncbi	Assembly									tet(C)	1
GCA_002518545.1	MOD1-EC6990	USA: CO	101	ncbi	Assembly										0
GCA_002519035.1	MOD1-EC6961	USA: MI	101	ncbi	Assembly									strB;aph(3')-Ia;strA;blaTEM-1B;tet(B)	5
GCA_002521765.1	MOD1-EC6790	USA: PA	101	ncbi	Assembly										0
GCA_002530685.1	N51980	USA:GA	101	ncbi	Assembly		blaCTX-M-14							strB;strA;tet(B);blaCTX-M-14	4
GCA_002535585.1	MOD1-EC6239	USA:MN	101	ncbi	Assembly									tet(B);tet(M);strB;strA	4
GCA_002535765.1	MOD1-EC6197	USA:NJ	101	ncbi	Assembly								Redundant		0
GCA_002536435.1	MOD1-EC6110	USA:CO	101	ncbi	Assembly									tet(A)	1
GCA_002536955.1	MOD1-EC6169	USA:SD	101	ncbi	Assembly										0
GCA_002541435.1	MOD1-EC6068	USA:CA	101	ncbi	Assembly									blaTEM-1B	1
GCA_002542155.1	MOD1-EC6038	USA:PA	101	ncbi	Assembly									strB;sul2;aph(3')-Ic;tet(B);strA	5
GCA_002544745.1	MOD1-EC5938	USA:CA	101	ncbi	Assembly									aph(3')-IIa;aph(6)-Ic	2
GCA_002547485.1	MOD1-EC5894	USA:PA	101	ncbi	Assembly									tet(B);strB;strA	3
GCA_002549115.1	MOD1-EC5823	USA:PA	101	ncbi	Assembly									tet(B);sul2;aadA1	3
GCA_002573465.1	21_Esco_HA-NL	Netherlands	101	ncbi	Assembly		blaCTX-M-14				S83L/D87N			tet(A);aadA1;dfrA1;blaCTX-M-14	4
GCA_002588135.1	FDAARGOS_437	Canada:BC	101	ncbi	Assembly		blaCTX-M-15	YRIN - I532L	recombined	frameshift	S83L/D87N	S80I/E84		mph(A);blaCTX-M-15;blaCTX-M-15;aac(3)-IIa;blaOXA-1;aac(6')Ib-cr;tet(A);blaTEM-1A;aac(3)-IIa;strA;strB;sul1;blaOXA-2;dfrA29;catA1;blaNDM-1;blaTEM-1B;rmtB	16
GCA_002787935.1	CREC-591	South Korea: Incheon	101	ncbi	Assembly	blaNDM-5	blaCTX-M-55/blaCTX-M123	YRIN - E349K-I532L	recombined	frameshift	S83L/D87N	S80I/E84	reference	mph(A);fosA;fosA;blaTEM-1B;catA1;dfrA14;mph(A);aph(3')-Ia;blaCTX-M-55;tet(A);sul2;strA;strB;blaNDM-5;tet(A);floR;blaCTX-M-123	14
GCA_002809875.1	4222	Argentina: Buenos Aires	101	ncbi	Assembly		blaCTX-M-2				S83L/D87H	S80I/E84		dfrA1;aadA1;blaCTX-M-2;sul1;tet(A);aadB;mcr-1.1	7
GCA_002891455.1	705	China: Shandong	101	ncbi	Assembly	blaNDM-5		YRIN - E349K-I532L	recombined	frameshift	S83L/D87N	S80I/E84		aph(3')-Ia;floR;blaNDM-5;sul2;fosA;catA1;erm(T);strB;dfrA14;aac(3)-IVa;strA;tet(A);mph(A)	13
GCA_002917355.1	19	Ecuador: Quito	101	ncbi	Assembly									dfrA12;tet(A);aadA2;blaTEM-1B;tet(M);sul3	6
GCA_002941445.1	YH17161	China: Heilongjiang	101	ncbi	Assembly		blaCTX-M-55	YRIN - E349K-I532L		frameshift	S83L/D87Y	S80I/E84		catA1;rmtB;tet(A);mph(A);blaTEM-1B;floR;blaCTX-M-55;fosA;dfrA14;strB;sul2;mcr-1.1	12
GCA_002991735.1	SC402	China	101	ncbi	Assembly		blaCTX-M-55						Redundant	blaTEM-1B;strA;oqxB;blaCTX-M-55;fosA;tet(A);sul2;QnrS1;floR;sul3;oqxA;strB;mef(B);aadA1;cmlA1;aadA2;dfrA12;mcr-1.1	18
GCA_002991895.1	SC139	China	101	ncbi	Assembly		blaCTX-M-55						Redundant	blaTEM-1B;strA;oqxB;blaCTX-M-55;fosA;tet(A);sul2;QnrS1;sul3;oqxA;strB;mef(B);aadA1;cmlA1;floR;aadA2;dfrA12;mcr-1.1	18
GCA_002991925.1	SC138	China	101	ncbi	Assembly		blaCTX-M-55						Redundant	blaTEM-1B;strA;oqxB;blaCTX-M-55;fosA;tet(A);sul2;QnrS1;sul3;oqxA;strB;mef(B);aadA1;cmlA1;floR;aadA2;dfrA12;mcr-1.1	18
GCA_002991965.1	SC134	China	101	ncbi	Assembly		blaCTX-M-55							blaTEM-1B;strA;oqxB;blaCTX-M-55;fosA;tet(A);sul2;QnrS1;sul3;oqxA;strB;mef(B);aadA1;cmlA1;floR;aadA2;dfrA12;mcr-1.1	18
GCA_002992115.1	SC141	China	101	ncbi	Assembly		blaCTX-M-55						Redundant	blaTEM-1B;strA;oqxB;blaCTX-M-55;fosA;tet(A);sul2;QnrS1;sul3;oqxA;strB;mef(B);aadA1;cmlA1;floR;aadA2;dfrA12;mcr-1.1	18
GCA_002993515.1	KG-11	USA	101	ncbi	Assembly								Redundant		0
GCA_002993545.1	KG-14	USA	101	ncbi	Assembly										0
GCA_002993805.1	SC135	China	101	ncbi	Assembly		blaCTX-M-55						Redundant	blaTEM-1B;strA;oqxB;blaCTX-M-55;fosA;tet(A);sul2;QnrS1;sul3;oqxA;strB;mef(B);aadA1;cmlA1;floR;aadA2;dfrA12;mcr-1.1	18
GCA_003007825.1	BA13969	India: Vellore	101	ncbi	Assembly	blaNDM-7		YRIN - E349K-I532L	recombined	frameshift	S83L/D87N	S80I/E84		rmtB;mph(A);blaTEM-1B;tet(B);blaNDM-7;blaSFO-1	6
GCA_003009135.1	E11-3	China:Shandong	101	ncbi	Assembly		blaCTX-M-14				S83L/D87		Redundant	floR;aph(4)-Ia;ARR-3;aac(3)-IVa;blaCTX-M-14;catB3;mph(A);tet(A);QnrS1;sul1;sul2;sul3;mcr-1.1	13
GCA_003009145.1	sc12-100	China:Sichuan	101	ncbi	Assembly						S83L/D87N	S80I/E84		blaTEM-1B;dfrA14;aac(3)-IId;mph(A);catA2;floR;sul2;strA;strB;mcr-1.1	10
GCA_003009355.1	12c1	China:Shanghai	101	ncbi	Assembly						S83L/D87N	S80I/E84		ARR-3;tet(A);blaTEM-1B;strB;strA;sul2;dfrA14	7
GCA_003009535.1	sc12-92	China:Sichuan	101	ncbi	Assembly		blaCTX-M-65				S83L/D87N	S80I/E84		floR;blaTEM-1B;tet(A);aph(4)-Ia;aadA1;aac(3)-IVa;sul3;aph(3')-Ia;lnu(F);cmlA1;tet(M);ARR-2;dfrA12;aadA2;sul2;blaCTX-M-65;aac(3)-IId;mcr-1.1	18
GCA_003009695.1	GZC11-6	China:Guangzhou	101	ncbi	Assembly		blaCTX-M-14				S83L/D87			floR;aph(4)-Ia;ARR-3;aac(3)-IVa;blaCTX-M-14;catB3;mph(A);tet(A);QnrS1;sul1;sul2;sul3;mcr-1.1	13
GCA_003010075.1	zlp18	China	101	ncbi	Assembly		blaCTX-M-14				S83L/D87		Redundant	floR;aph(4)-Ia;ARR-3;aac(3)-IVa;blaCTX-M-14;catB3;mph(A);tet(A);QnrS1;sul1;sul2;sul3;mcr-1.1	13
GCA_003010125.1	sc14-188	China:Sichuan	101	ncbi	Assembly		blaCTX-M-14				S83L/D87			floR;aph(4)-Ia;ARR-3;aac(3)-IVa;blaCTX-M-14;catB3;mph(A);tet(A);QnrS1;sul1;sul2;sul3;mcr-1.1	13
GCA_003010195.1	sc12-93	China:Sichuan	101	ncbi	Assembly						S83L/D87N	S80I/E84		dfrA17;aac(3)-IId;sul2;mph(A);aadA5;erm(B);floR;aph(3')-Ic;tet(B);sul1;strB;lnu(F);strA;aadA2;mcr-1.1	15
GCA_003010335.1	sc12-96	China:Sichuan	101	ncbi	Assembly		blaCTX-M-65				S83L/D87N	S80I/E84		floR;strB;aac(3)-IIa;aadA2;aph(3')-Ia;strA;mph(A);dfrA14;blaTEM-1B;blaCTX-M-65;cmlA1;sul2;tet(A);aadA1;fosA;sul3;catA2;mcr-1.1	18
GCA_003048005.1	KG-18	USA	101	ncbi	Assembly										0
GCA_003048055.1	KG-19	USA	101	ncbi	Assembly										0
GCA_003048145.1	KG-22	USA	101	ncbi	Assembly								Redundant		0
GCA_003112045.1	H8Ecoli	China:Shandong	101	ncbi	Assembly		blaCTX-M-14				S83L/D87N	S80I/E84		fosA;blaCTX-M-14;aac(3)-IVa;aph(4)-Ia;sul2;floR;aadA2;cmlA1;aadA1;sul3;aph(3')-Ia;dfrA12;sul1;oqxA;oqxB;tet(A);mcr-1.1	17
GCA_003144895.1	Win2013_WWKa_NEU_60	Germany: Dresden-Kaditz	101	ncbi	Assembly									sul2;blaTEM-1B;tet(A)	3
GCA_900093835.1	CT67C.C1	vietnam	101	ncbi	Assembly		blaCTX-M-55							aph(3')-Ia;lnu(F);tet(A);aac(3)-IIa;tet(M);sul3;blaTEM-1B;sul2;QnrS1;blaCTX-M-55;dfrA14;floR;mcr-1.1	13
GCA_900093885.1	CT67C.C2	vietnam	101	ncbi	Assembly		blaCTX-M-55						Redundant	lnu(F);tet(A);aac(3)-IIa;tet(M);dfrA14;sul2;sul3;blaCTX-M-55;blaTEM-1B;QnrS1;aph(3')-Ia;floR;mcr-1.1	13
GCA_900195955.1	F2_22	Australia	101	ncbi	Assembly									tet(A);blaTEM-1B;sul3;aadA1;cmlA1;aadA2;dfrA12	7
GCA_900236055.1	JHI_5088	United Kingdom	101	ncbi	Assembly										0
GCA_000503615.1	87A	unknown	115	ncbi	Assembly									blaTEM-1B;blaCMY-2	2
GCA_000951735.1	D2-2	Denmark	115	ncbi	Assembly										0
GCA_001893625.1	675	China: Shandong	115	ncbi	Assembly	blaNDM-5								oqxB;blaCMY-2;aph(3')-IIa;sul2;strA;strB;blaNDM-5;tet(A);floR;fosA;oqxA;aadA5;mph(A);sul1;dfrA17	15
GCA_002227705.1	MOD1-EC5626	USA:CO	115	ncbi	Assembly									tet(C)	1
GCA_002228095.1	MOD1-EC5590	USA:CO	115	ncbi	Assembly									strB;strA	2
GCA_002885775.1	B7S10	USA: Philadelphia	115	ncbi	Assembly									sul1;aac(3)-VIa;aadA1;sul2	4
GCA_002885795.1	B7S3	USA: Philadelphia	115	ncbi	Assembly									sul1;aac(3)-VIa;aadA1;sul2	4
GCA_002918155.1	NAEC4	India: Mysore	115	ncbi	Assembly									sul2;tet(B);strA;strB;aph(3')-Ic;blaCMY-2	6
GCA_002918175.1	NAEC2	India: Hyderbad	115	ncbi	Assembly									tet(A);aph(3')-Ia;mef(B);sul3;aadA1;cmlA1;aadA2;dfrA12	8
GCA_003143615.1	B7S19	USA: Philadelphia	115	ncbi	Assembly									sul1;aac(3)-VIa;aadA1;sul2	4
GCA_003143655.1	B8S56	USA: Philadelphia	115	ncbi	Assembly									sul2	1
GCA_000176695.2	H299	unknown	117	ncbi	Assembly									tet(A);strB;strA;sul2;tet(C);dfrA5;blaTEM-1B	7
GCA_000340275.1	SEPT362	Brazil	117	ncbi	Assembly									blaTEM-1B;strB;sul2;strA;tet(B);dfrA8;aadA1	7
GCA_000457125.1	HVH 79 (4-2512823)	Denmark	117	ncbi	Assembly									aadA1;sul1;blaTEM-1A	3
GCA_000458825.1	HVH 188 (4-2356988)	Denmark	117	ncbi	Assembly										0
GCA_000503255.1	897	unknown	117	ncbi	Assembly		blaCTX-M-1							aadA1;sul2;dfrA1;blaCTX-M-1;sul1	5
GCA_000503595.1	53C	unknown	117	ncbi	Assembly		blaCTX-M-1							blaCMY-2;sul2;blaCTX-M-1;aadA5;dfrA17	5
GCA_000503655.1	1047	unknown	117	ncbi	Assembly		blaCTX-M-1							dfrA1;blaCMY-2;sul2;aadA1;sul1;blaCTX-M-1	6
GCA_000503675.1	38.52	unknown	117	ncbi	Assembly		blaCTX-M-1							aadA1;blaCTX-M-1;sul2;dfrA1;sul1	5
GCA_000617225.1	569109	USA	117	ncbi	Assembly									tet(B);sul2	2
GCA_000704225.1	2-177-06_S4_C1	Tanzania	117	ncbi	Assembly									blaTEM-1B;sul2;strA;strB;dfrA5	5
GCA_000781595.1	blood-10-0682	USA: Pacific Northwest	117	ncbi	Assembly									sul1;sul2;blaCMY-2;aadA1;aac(3)-VIa	5
GCA_000812325.1	EC4	Malaysia: Selangor	117	ncbi	Assembly									sul2;tet(B);blaCMY-2	3
GCA_000812345.1	EC5	Malaysia: Selangor	117	ncbi	Assembly		blaCTX-M-55							tet(M);blaCTX-M-55;blaTEM-1B;dfrA12;aph(3')-Ic;sul2;tet(A);strA;strB;floR;mcr-1.1	11
GCA_000812365.1	EC7	Malaysia: Selangor	117	ncbi	Assembly		blaCTX-M-55							blaTEM-1B;dfrA12;blaCTX-M-55;aph(3')-Ic;sul2;tet(A);strB;tet(M);strA;floR;mcr-1.1	11
GCA_000831715.1	53C	Netherlands: Utrecht	117	ncbi	Assembly		blaCTX-M-1							dfrA17;aadA5;sul2;blaCTX-M-1;blaCMY-2	5
GCA_001021635.1	APEC O2-211	USA: Delaware	117	ncbi	Assembly									tet(B);sul2	2
GCA_001030505.1	BIDMC101	unknown	117	ncbi	Assembly									tet(A)	1
GCA_001420955.1	2009C-3133	USA	117	ncbi	Assembly									sul2;tet(B);strA;strB;aph(3')-Ic;blaTEM-1B;blaTEM-1B;dfrA1;aadA1;sul1;blaTEM-1D;aph(3')-Ic;blaTEM-1B;sul2;strA;strB;aph(3')-Ia;tet(A)	12
GCA_001519195.1	GN02004	USA	117	ncbi	Assembly									aadA1;sul1;tet(A)	3
GCA_001614485.1	cattle5	France	117	ncbi	Assembly									aph(3')-Ia	1
GCA_001614615.1	cattle12	China:Xinjiang	117	ncbi	Assembly									aac(6')Ib-cr;aac(3)-IVa;aph(4)-Ia;catB3;tet(A);ARR-3;sul1;dfrA5;sul2;blaOXA-1;floR	11
GCA_001614665.1	cattle14	China:Xinjiang	117	ncbi	Assembly									oqxB;aph(3')-IIa;aac(3)-IIa;sul2;strB;floR;tet(A);oqxA;blaTEM-1B;strA	10
GCA_001614795.1	cattle19	China:Xinjiang	117	ncbi	Assembly									strA;oqxB;ARR-3;catB3;tet(A);blaOXA-1;oqxA;aac(6')Ib-cr;sul1;aph(4)-Ia;floR;aac(3)-IVa;strB	13
GCA_001652345.1	E44	Denmark	117	ncbi	Assembly										0
GCA_001676985.1	IHIT27704	Germany: Franfurt	117	ncbi	Assembly		blaCTX-M-55							dfrA14;QnrS1;lnu(F);mph(A);aac(3)-IId;blaTEM-1B;floR;tet(A);strB;strA;sul2;ARR-2;blaCTX-M-55;aadA22;mcr-1.1	15
GCA_001696335.1	012PP2015	Poland	117	ncbi	Assembly									QnrB19;sul2;tet(A);blaTEM-1B;floR	5
GCA_001894395.1	708	China: Shandong	117	ncbi	Assembly	blaNDM-9	blaCTX-M-65							QnrS1;aph(4)-Ia;aph(3')-Ic;dfrA17;blaTEM-1B;lnu(F);cmlA1;aadA2;dfrA14;sul3;blaCTX-M-65;blaNDM-9;mph(A);fosA;blaOXA-10;sul2;sul1;strB;dfrA12;aac(3)-IVa;aadA5;floR;ARR-3	23
GCA_001900735.1	D10	unknown	117	ncbi	Assembly									sul2;tet(B)	2
GCA_001970045.1	N40513	USA: MD	117	ncbi	Assembly		blaCTX-M-1							blaCTX-M-1;tet(A);sul2	3
[truncated: 2,029 more rows]
