# Supplementary material for: Stepwise evolution and convergent recombination underlie the global dissemination of carbapenemase-producing Escherichia coli
Source: Genome Med. 2020 Jan 20;12:10. doi: 10.1186/s13073-019-0699-6 (PMC6970295; doi:10.1186/s13073-019-0699-6)
Supplement: Supplementary file 6 — Additional file 6:. Source data file of the work. [file 13073_2019_699_MOESM6_ESM.xls]

## Sheet: Fig. 2
Data for Fig 2c. Mutations and recombination in the ompC gene.
Antibiotics	Pladsmid	Exp. 1	Exp. 2	Exp. 3	Exp. 4	Mean
Cefalotin	pACYC184	15.5	15	15.2	15.6	15.325
Cefalotin	OmpC_ST167	23.3	22.7	23.3	21.5	22.7
Cefalotin	OmpC_ST167 G->D	19.6	18.8	18.5	18.5	18.85
Cefalotin	OmpC_ST38	19.2	18.9	18.2	18.5	18.7
Cefalotin	OmpC_ST410	22.7	22.6	22.7	22.3	22.575
Cefalotin	OmpC_ST410 R191L	22.6	21.1	21.3	20.5	21.375
Moxalactam	pACYC184	18	17.1	15.8	16.8	16.925
Moxalactam	OmpC_ST167	30.8	28.9	29.5	27.8	29.25
Moxalactam	OmpC_ST167 G->D	25	24.2	23	23.6	23.95
Moxalactam	OmpC_ST38	29.4	28.1	28.1	27.5	28.275
Moxalactam	OmpC_ST410	31.6	29.1	29.2	28.6	29.625
Moxalactam	OmpC_ST410 R191L	28.8	26.9	26.9	26.3	27.225
Cefotaxime	pACYC184	25	25	24.7	24.4	24.775
Cefotaxime	OmpC_ST167	33	32.6	32	30.9	32.125
Cefotaxime	OmpC_ST167 G->D	30.1	28	28.6	28.4	28.775
Cefotaxime	OmpC_ST38	28.4	26.7	28	27.7	27.7
Cefotaxime	OmpC_ST410	33.3	31.1	31.7	31.1	31.8
Cefotaxime	OmpC_ST410 R191L	31.5	30.1	29.8	29.7	30.275
Ertapenem	pACYC184	8.7	10.3	10.4	10.2	9.9
Ertapenem	OmpC_ST167	23.7	25.8	25.2	24.7	24.85
Ertapenem	OmpC_ST167 G->D	19.7	21.2	22.4	21.9	21.3
Ertapenem	OmpC_ST38	20.3	22.2	22.9	22.5	21.975
Ertapenem	OmpC_ST410	25.3	26	27	25.8	26.025
Ertapenem	OmpC_ST410 R191L	22.1	24.8	24.2	24.2	23.825
Meropenem	pACYC184	8.4	9.9	10.4	10.4	9.775
Meropenem	OmpC_ST167	28.4	29.5	30	28.1	29
Meropenem	OmpC_ST167 G->D	25.7	26.9	26.7	27.7	26.75
Meropenem	OmpC_ST38	26.4	29.1	27	27.8	27.575
Meropenem	OmpC_ST410	28.7	28.7	28.4	29.7	28.875
Meropenem	OmpC_ST410 R191L	27.6	28.7	28.6	29	28.475
Imipenem	pACYC184	14.9	15.5	15.2	16.7	15.575
Imipenem	OmpC_ST167	29.8	28.6	27.9	28.3	28.65
Imipenem	OmpC_ST167 G->D	28.4	29.2	28.8	29.4	28.95
Imipenem	OmpC_ST38	29	29.2	29.6	30.2	29.5
Imipenem	OmpC_ST410	27.9	29.8	29.4	29.9	29.25
Imipenem	OmpC_ST410 R191L	30.2	29.2	30.2	28.2	29.45

## Sheet: Fig 3
Dat for Fig.3d. Functional analyses of ftsI and ompF mutations occurring in the OXA-181 Ec ST410 subclade.
Strain	NaCl	ompF/recA relative expresion	ompC/recA relative expresion
Ec-MAD	0 M	0.0269993	2.36882
Ec-MAD	0 M	0.00861679	2.84641
Ec-MAD	0 M	0.0157335	2.32015
Ec-MAD	0.3 M	0.00537357	1.50204
Ec-MAD	0.3 M	0.00223548	0.982357
Ec-MAD	0.3 M	0.0022109	1.21521
CNR83B9	0 M	0.0240731	2.12655
CNR83B9	0 M	0.00712389	2.31197
CNR83B9	0 M	0.0234747	2.19107
CNR83B9	0.3 M	0.00218059	1.05036
CNR83B9	0.3 M	0.00380779	1.37194
CNR83B9	0.3 M	0.00317093	1.21391
CNR92B7	0 M	0.472564	2.21492
CNR92B7	0 M	0.155206	2.01375
CNR92B7	0 M	0.180638	2.31437
CNR92B7	0.3 M	0.0174446	1.18508
CNR92B7	0.3 M	0.0195826	1.43988
CNR92B7	0.3 M	0.0131836	1.08015
CNR93G1	0 M	0.287696	2.51197
CNR93G1	0 M	0.430932	2.24517
CNR93G1	0 M	0.967872	1.39782
CNR93G1	0.3 M	0.0145095	1.2736
CNR93G1	0.3 M	0.019918	1.36379
CNR93G1	0.3 M	0.0203985	1.21421

## Sheet: Fig 6
Data for Fig. 6a. Occurrence of ARG and blaCTX-M genes in CP-Ec isolates
ST	Isolates	Carbapenemase	Numlber of ARG carbapenemase gene excluded
ST10	GCA_000164555.1		6
ST10	GCA_000194535.2		5
ST10	GCA_000194555.2		0
ST10	GCA_000194705.2		2
ST10	GCA_000220005.2		8
ST10	GCA_000224395.2		5
ST10	GCA_000225165.2		1
ST10	GCA_000226585.1		1
ST10	GCA_000249615.2		0
ST10	GCA_000249635.2		0
ST10	GCA_000249655.2		0
ST10	GCA_000257275.1		0
ST10	GCA_000259425.1		0
ST10	GCA_000261145.1		2
ST10	GCA_000261405.1		1
ST10	GCA_000304075.2		0
ST10	GCA_000305175.1		0
ST10	GCA_000326925.1		0
ST10	GCA_000333175.1		0
ST10	GCA_000340255.1		3
ST10	GCA_000350045.2		7
ST10	GCA_000350885.1		0
ST10	GCA_000351525.1		0
ST10	GCA_000351725.1		0
ST10	GCA_000351865.1		0
ST10	GCA_000351965.1		1
ST10	GCA_000351985.1		0
ST10	GCA_000352185.1		1
ST10	GCA_000352945.1		0
ST10	GCA_000356145.2		5
ST10	GCA_000356185.2		4
ST10	GCA_000356285.2		2
ST10	GCA_000407805.1		0
ST10	GCA_000407945.1		4
ST10	GCA_000408025.1		0
ST10	GCA_000408045.1		0
ST10	GCA_000408345.1		0
ST10	GCA_000446225.2		0
ST10	GCA_000446325.2		0
ST10	GCA_000446585.2		0
ST10	GCA_000458495.1		0
ST10	GCA_000460275.1		2
ST10	GCA_000460335.1		1
ST10	GCA_000460555.1		0
ST10	GCA_000460635.1		1
ST10	GCA_000461115.1		1
ST10	GCA_000461235.1		4
ST10	GCA_000461395.1		0
ST10	GCA_000461755.1		0
ST10	GCA_000474035.1		1
ST10	GCA_000495075.1		0
ST10	GCA_000498235.1		0
ST10	GCA_000503315.1		7
ST10	GCA_000503355.1		8
ST10	GCA_000503375.1		10
ST10	GCA_000503395.1		4
ST10	GCA_000503415.1		2
ST10	GCA_000511425.1		11
ST10	GCA_000601155.1		0
ST10	GCA_000601175.1		0
ST10	GCA_000601215.1		6
ST10	GCA_000601235.1		6
ST10	GCA_000601255.1		8
ST10	GCA_000601295.1		7
ST10	GCA_000601315.1		0
ST10	GCA_000601335.1		0
ST10	GCA_000627135.1		6
ST10	GCA_000627315.1		6
ST10	GCA_000627905.1		8
ST10	GCA_000627945.1		9
ST10	GCA_000687005.1		6
ST10	GCA_000687065.1		3
ST10	GCA_000700105.1		6
ST10	GCA_000700185.1		8
ST10	GCA_000700205.1		8
ST10	GCA_000700245.1		6
ST10	GCA_000700305.1		1
ST10	GCA_000700425.1		6
ST10	GCA_000700465.1		6
ST10	GCA_000700505.1		6
ST10	GCA_000700665.1		6
ST10	GCA_000700705.1		5
ST10	GCA_000703445.1		2
ST10	GCA_000704145.1		7
ST10	GCA_000704325.1		6
ST10	GCA_000704865.1		4
ST10	GCA_000713235.1		1
ST10	GCA_000713355.1		1
ST10	GCA_000713525.1		0
ST10	GCA_000713535.1		0
ST10	GCA_000713695.1		7
ST10	GCA_000713735.1		7
ST10	GCA_000713945.1		6
ST10	GCA_000713975.1		6
ST10	GCA_000714065.1		6
ST10	GCA_000714105.1		4
ST10	GCA_000714145.1		4
ST10	GCA_000714225.1		4
ST10	GCA_000723325.1		4
ST10	GCA_000725305.1		1
ST10	GCA_000731455.1		0
ST10	GCA_000752175.1		0
ST10	GCA_000754855.1		1
ST10	GCA_000768405.1		0
ST10	GCA_000768415.1		0
ST10	GCA_000768465.1		0
ST10	GCA_000768485.1		0
ST10	GCA_000768505.1		0
ST10	GCA_000776355.1		0
ST10	GCA_000777535.1		0
ST10	GCA_000779005.1		8
ST10	GCA_000779155.1		7
ST10	GCA_000779955.1		0
ST10	GCA_000780965.1		0
ST10	GCA_000781915.1		11
ST10	GCA_000785865.1		8
ST10	GCA_000797595.1		6
ST10	GCA_000797795.1		6
ST10	GCA_000798135.1		5
ST10	GCA_000798255.1		7
ST10	GCA_000798575.1		1
ST10	GCA_000800215.1		2
ST10	GCA_000814145.2	blaNDM-1	9
ST10	GCA_000818985.1		6
ST10	GCA_000819105.1		8
ST10	GCA_000819305.1		9
ST10	GCA_000819325.1		6
ST10	GCA_000826925.1		2
ST10	GCA_000829985.1		4
ST10	GCA_000833635.2		0
ST10	GCA_000942915.1		4
ST10	GCA_000948005.1		2
ST10	GCA_000951895.1		0
ST10	GCA_000951935.1		0
ST10	GCA_000952955.1		0
ST10	GCA_000954045.1		0
ST10	GCA_000968515.1		4
ST10	GCA_001010165.1		5
ST10	GCA_001012025.1		8
ST10	GCA_001030405.1		0
ST10	GCA_001030635.1		1
ST10	GCA_001043215.1		0
ST10	GCA_001188105.2		0
ST10	GCA_001264215.1		0
ST10	GCA_001268405.1		7
ST10	GCA_001268465.1		0
ST10	GCA_001268765.1		9
ST10	GCA_001268825.1		0
ST10	GCA_001268845.1		1
ST10	GCA_001269105.1		5
ST10	GCA_001269265.1		0
ST10	GCA_001277735.1		6
ST10	GCA_001277755.1		8
ST10	GCA_001283165.1		1
ST10	GCA_001283665.1		6
ST10	GCA_001284305.1		6
ST10	GCA_001284445.1		3
ST10	GCA_001284905.1		0
ST10	GCA_001285265.1		6
ST10	GCA_001285345.1		6
ST10	GCA_001306715.1		5
ST10	GCA_001309735.1		0
ST10	GCA_001405275.1		1
ST10	GCA_001441325.1		0
ST10	GCA_001441335.1		1
ST10	GCA_001484455.1		0
ST10	GCA_001559675.1		1
ST10	GCA_001575275.1		0
ST10	GCA_001575295.1		0
ST10	GCA_001575305.1		4
ST10	GCA_001575355.1		0
ST10	GCA_001575385.1		0
ST10	GCA_001575435.1		0
ST10	GCA_001575475.1		6
ST10	GCA_001575545.1		12
ST10	GCA_001575555.1		4
ST10	GCA_001575595.1		0
ST10	GCA_001575625.1		0
ST10	GCA_001575675.1		0
ST10	GCA_001575755.1		0
ST10	GCA_001575775.1		0
ST10	GCA_001575785.1		0
ST10	GCA_001575885.1		0
ST10	GCA_001575915.1		2
ST10	GCA_001575945.1		0
ST10	GCA_001575995.1		8
ST10	GCA_001576015.1		7
ST10	GCA_001576025.1		0
ST10	GCA_001576105.1		0
ST10	GCA_001576135.1		0
ST10	GCA_001576155.1		0
ST10	GCA_001576205.1		0
ST10	GCA_001576235.1		0
ST10	GCA_001576325.1		0
ST10	GCA_001576385.1		0
ST10	GCA_001576395.1		0
ST10	GCA_001576455.1		0
ST10	GCA_001576465.1		9
ST10	GCA_001576495.1		1
ST10	GCA_001607125.1		4
ST10	GCA_001607685.1		0
ST10	GCA_001607895.1		0
ST10	GCA_001609745.1		0
ST10	GCA_001614375.1		12
ST10	GCA_001614395.1		3
ST10	GCA_001614405.1		0
ST10	GCA_001614635.1		13
ST10	GCA_001614775.1		1
ST10	GCA_001614875.1		5
ST10	GCA_001615205.1		1
ST10	GCA_001615395.1		11
ST10	GCA_001615565.1		21
ST10	GCA_001615695.1		13
ST10	GCA_001616145.1		11
ST10	GCA_001616175.1		7
ST10	GCA_001616375.1		11
ST10	GCA_001637635.1		0
ST10	GCA_001641955.1		11
ST10	GCA_001660095.1		3
ST10	GCA_001663075.1		0
ST10	GCA_001693555.1		8
ST10	GCA_001704555.1		0
ST10	GCA_001742465.1		0
ST10	GCA_001742545.1		5
ST10	GCA_001742555.1		0
ST10	GCA_001748535.1		0
ST10	GCA_001748605.1		5
ST10	GCA_001748895.1		3
ST10	GCA_001749125.1		0
ST10	GCA_001749225.1		0
ST10	GCA_001749285.1		1
ST10	GCA_001749295.1		7
ST10	GCA_001749385.1		1
ST10	GCA_001749505.1		0
ST10	GCA_001749525.1		0
ST10	GCA_001749635.1		0
ST10	GCA_001881515.1		11
ST10	GCA_001893285.1	blaNDM-5	16
ST10	GCA_001893345.1	blaNDM-5	13
ST10	GCA_001893615.1	blaNDM-9	16
ST10	GCA_001893865.1	blaNDM-1	4
ST10	GCA_001894165.1		11
ST10	GCA_001894385.1	blaNDM-5	19
ST10	GCA_001894685.1		11
ST10	GCA_001900455.1		0
ST10	GCA_001900655.1		10
ST10	GCA_001911595.1		5
ST10	GCA_001912105.1		6
ST10	GCA_001932515.1		0
ST10	GCA_001940485.1		12
ST10	GCA_001982555.1		6
ST10	GCA_001990855.1		7
ST10	GCA_001990925.1		0
ST10	GCA_002001635.1		3
ST10	GCA_002001765.1		1
ST10	GCA_002001885.1		4
ST10	GCA_002001905.1		7
ST10	GCA_002002005.1		4
ST10	GCA_002002075.1		4
ST10	GCA_002002285.1		5
ST10	GCA_002007705.1		0
ST10	GCA_002012185.1	blaKPC-2	13
ST10	GCA_002018425.1		2
ST10	GCA_002087785.1		8
ST10	GCA_002087945.1		0
ST10	GCA_002109745.1		0
ST10	GCA_002109805.1		0
ST10	GCA_002109815.1		0
ST10	GCA_002110025.1		0
ST10	GCA_002110225.1		5
ST10	GCA_002110275.1		0
ST10	GCA_002110545.1		2
ST10	GCA_002114355.1		8
ST10	GCA_002118095.1		0
ST10	GCA_002133365.1	blaNDM-5	22
ST10	GCA_002133765.1		7
ST10	GCA_002154095.1		17
ST10	GCA_002173205.1		0
ST10	GCA_002190105.1		0
ST10	GCA_002190155.1		3
ST10	GCA_002190205.1		0
ST10	GCA_002190245.1		1
ST10	GCA_002190275.1		0
ST10	GCA_002190285.1		0
ST10	GCA_002190305.1		0
ST10	GCA_002190355.1		0
ST10	GCA_002190375.1		0
ST10	GCA_002190605.1		3
ST10	GCA_002206945.1		1
ST10	GCA_002216915.1		15
ST10	GCA_002217115.1		18
ST10	GCA_002223925.1		11
ST10	GCA_002225535.1		6
ST10	GCA_002225635.1		6
ST10	GCA_002225655.1		0
ST10	GCA_002225685.1		0
ST10	GCA_002225725.1		6
ST10	GCA_002225935.1		0
ST10	GCA_002225945.1		1
ST10	GCA_002226095.1		0
ST10	GCA_002226155.1		4
ST10	GCA_002226295.1		3
ST10	GCA_002226465.1		0
ST10	GCA_002226505.1		5
ST10	GCA_002226695.1		0
ST10	GCA_002226785.1		7
ST10	GCA_002226905.1		0
ST10	GCA_002226935.1		1
ST10	GCA_002227105.1		4
ST10	GCA_002227115.1		0
ST10	GCA_002227365.1		1
ST10	GCA_002227375.1		5
ST10	GCA_002227455.1		6
ST10	GCA_002227535.1		1
ST10	GCA_002227565.1		4
ST10	GCA_002227655.1		6
ST10	GCA_002227795.1		4
ST10	GCA_002227865.1		4
ST10	GCA_002228355.1		5
ST10	GCA_002228565.1		3
ST10	GCA_002228585.1		5
ST10	GCA_002229165.1		3
ST10	GCA_002229375.1		6
ST10	GCA_002229535.1		0
ST10	GCA_002229785.1		4
ST10	GCA_002229795.1		0
ST10	GCA_002229955.1		0
ST10	GCA_002230185.1		0
ST10	GCA_002230355.1		0
ST10	GCA_002230465.1		0
ST10	GCA_002231025.1		11
ST10	GCA_002231075.1		13
ST10	GCA_002231655.1		8
ST10	GCA_002231885.1		3
ST10	GCA_002232535.1		6
ST10	GCA_002232715.1		5
ST10	GCA_002232935.1		1
ST10	GCA_002233015.1		1
ST10	GCA_002233355.1		1
ST10	GCA_002234555.1		0
ST10	GCA_002270225.1		17
ST10	GCA_002283675.1		6
ST10	GCA_002290325.1		0
ST10	GCA_002310735.1		5
ST10	GCA_002319165.1		5
ST10	GCA_002319385.1		1
ST10	GCA_002324595.1		9
ST10	GCA_002442335.1		1
ST10	GCA_002442405.1		7
ST10	GCA_002456375.1		0
ST10	GCA_002456415.1		4
ST10	GCA_002458255.1		3
ST10	GCA_002460735.1		4
ST10	GCA_002461775.1		0
ST10	GCA_002463285.1		6
ST10	GCA_002463705.1		5
ST10	GCA_002464015.1		5
ST10	GCA_002464165.1		9
ST10	GCA_002464525.1		8
ST10	GCA_002464535.1		7
ST10	GCA_002464575.1		7
ST10	GCA_002464875.1		0
ST10	GCA_002466925.1		0
ST10	GCA_002467255.1		0
ST10	GCA_002467335.1		6
ST10	GCA_002467345.1		7
ST10	GCA_002467625.1		4
ST10	GCA_002467735.1		0
ST10	GCA_002467825.1		0
ST10	GCA_002468485.1		0
ST10	GCA_002468765.1		6
ST10	GCA_002468835.1		3
ST10	GCA_002469095.1		0
ST10	GCA_002469205.1		0
ST10	GCA_002469285.1		1
ST10	GCA_002473435.1		2
ST10	GCA_002473455.1		0
ST10	GCA_002474495.1		0
ST10	GCA_002474605.1		8
ST10	GCA_002474705.1		6
ST10	GCA_002475295.1		4
ST10	GCA_002475305.1		6
ST10	GCA_002475415.1		4
ST10	GCA_002475445.1		1
ST10	GCA_002475635.1		10
ST10	GCA_002484485.1		10
ST10	GCA_002484685.1		0
ST10	GCA_002485055.1		1
ST10	GCA_002485085.1		10
ST10	GCA_002485355.1		6
ST10	GCA_002485525.1		6
ST10	GCA_002485555.1		2
ST10	GCA_002485665.1		4
ST10	GCA_002485775.1		5
ST10	GCA_002485945.1		4
ST10	GCA_002486185.1		4
ST10	GCA_002486895.1		6
ST10	GCA_002487185.1		0
ST10	GCA_002510885.1		5
ST10	GCA_002510925.1		0
ST10	GCA_002510965.1		5
ST10	GCA_002511475.1		4
ST10	GCA_002512425.1		4
ST10	GCA_002513075.1		4
ST10	GCA_002513235.1		1
ST10	GCA_002513495.1		0
ST10	GCA_002513705.1		0
ST10	GCA_002514275.1		3
ST10	GCA_002514765.1		0
ST10	GCA_002516985.1		14
ST10	GCA_002517145.1		0
ST10	GCA_002517365.1		8
ST10	GCA_002517375.1		1
ST10	GCA_002517465.1		6
ST10	GCA_002517555.1		0
ST10	GCA_002517885.1		3
ST10	GCA_002517905.1		2
ST10	GCA_002518725.1		0
ST10	GCA_002518745.1		3
ST10	GCA_002520205.1		5
ST10	GCA_002521055.1		0
ST10	GCA_002521065.1		7
ST10	GCA_002521275.1		7
ST10	GCA_002521285.1		6
ST10	GCA_002521515.1		0
ST10	GCA_002521755.1		5
ST10	GCA_002521955.1		8
ST10	GCA_002522005.1		10
ST10	GCA_002522095.1		3
ST10	GCA_002522255.1		1
ST10	GCA_002522865.1		0
ST10	GCA_002522895.1		8
ST10	GCA_002530715.1		5
ST10	GCA_002534875.1		0
ST10	GCA_002534955.1		4
ST10	GCA_002535035.1		0
ST10	GCA_002535535.1		0
ST10	GCA_002535625.1		6
ST10	GCA_002535715.1		0
ST10	GCA_002536695.1		7
ST10	GCA_002536795.1		12
ST10	GCA_002537395.1		1
ST10	GCA_002538945.1		4
ST10	GCA_002541825.1		0
ST10	GCA_002545085.1		16
ST10	GCA_002545575.1		5
ST10	GCA_002546095.1		2
ST10	GCA_002546975.1		6
ST10	GCA_002547665.1		2
ST10	GCA_002547835.1		0
ST10	GCA_002548165.1		2
ST10	GCA_002548375.1		0
ST10	GCA_002549355.1		1
ST10	GCA_002549495.1		7
ST10	GCA_002573115.1		6
ST10	GCA_002631375.1		1
ST10	GCA_002631485.1		8
ST10	GCA_002631575.1		13
ST10	GCA_002776495.1	blaVIM-1	13
ST10	GCA_002843685.1		1
ST10	GCA_002849135.1		7
ST10	GCA_002872145.1		0
ST10	GCA_002879975.1		0
ST10	GCA_002917295.1		7
ST10	GCA_002917535.1		5
ST10	GCA_002917545.1		6
ST10	GCA_002917695.1		6
ST10	GCA_002919645.1	blaKPC-2	6
ST10	GCA_002934025.1		0
ST10	GCA_002941065.1		14
ST10	GCA_002941765.1		17
ST10	GCA_002941785.1		20
ST10	GCA_002941845.1		22
ST10	GCA_002942585.1		7
ST10	GCA_002959295.1		11
ST10	GCA_002991705.1		14
ST10	GCA_002991805.1		5
ST10	GCA_003008995.1		0
ST10	GCA_003009495.1		2
ST10	GCA_003009545.1		22
ST10	GCA_003010005.1		15
ST10	GCA_003010105.1		19
ST10	GCA_003010375.1		12
ST10	GCA_003030025.1		8
ST10	GCA_003052665.1		0
ST10	GCA_003086215.1		9
ST10	GCA_003114695.1		0
ST10	GCA_003114715.1		0
ST10	GCA_003114775.1		0
ST10	GCA_003145165.1		7
ST10	GCA_003145525.1		0
ST10	GCA_003145755.1		4
ST10	GCA_003145975.1		0
ST10	GCA_003146195.1		5
ST10	GCA_003146385.1		4
ST10	GCA_003150815.1	blaNDM-5	0
ST10	GCA_003172755.1	blaNDM-5	17
ST10	GCA_003175975.1		0
ST10	GCA_003176275.1		3
ST10	GCA_003176315.1		4
ST10	GCA_003180975.1		9
ST10	GCA_900015955.1		0
ST10	GCA_900044035.1		6
ST10	GCA_900044045.1		8
ST10	GCA_900093965.1		16
ST10	GCA_900093975.1		17
ST10	GCA_900096805.1		0
ST10	GCA_900195385.1		4
ST10	GCA_900195435.1		1
ST10	GCA_900195595.1		1
ST10	GCA_900195645.1		10
ST10	GCA_900195705.1		11
ST10	GCA_900195975.1		7
ST10	GCA_900195985.1		14
ST10	GCA_900196015.1		8
ST10	GCA_900196265.1		15
ST10	GCA_900196285.1		14
ST10	GCA_900196425.1		0
ST10	GCA_900196585.1		12
ST10	GCA_900196675.1		5
ST10	GCA_900236075.1		0
ST10	GCA_900236095.1		0
ST10	GCA_900236115.1		0
ST10	GCA_900236145.1		0
ST10	GCA_900236165.1		0
ST10	GCA_900239835.1		7
ST10	GCA_900239845.1		4
ST10	GCA_900239925.1		8
ST38	ERR1276256	blaOXA-48	6
ST38	ERR1276258	blaOXA-48	7
ST38	ERR1276260	blaOXA-48	7
ST38	ERR1276261	blaOXA-48	11
ST38	ERR1276262	blaOXA-48	7
ST38	ERR1276263	blaOXA-48	10
ST38	ERR1276264	blaOXA-244	9
ST38	ERR1276265	blaOXA-48	6
ST38	ERR1276267	blaOXA-48	7
ST38	ERR1276268	blaOXA-48	6
ST38	ERR1276273	blaOXA-48	7
ST38	ERR1276274	blaOXA-48	6
ST38	ERR1276275	blaOXA-48	7
ST38	ERR1276276	blaOXA-48	6
ST38	ERR1276277	blaOXA-48	6
ST38	ERR1276278	blaOXA-48	6
ST38	GCA_000351705.1		8
ST38	GCA_000408665.1		6
ST38	GCA_000456645.1		6
ST38	GCA_000459995.1		8
ST38	GCA_000460495.1		0
ST38	GCA_000506505.1		1
ST38	GCA_000513455.1		7
ST38	GCA_000601355.1		7
ST38	GCA_000692875.1		10
ST38	GCA_000703865.1		5
ST38	GCA_000703885.1		6
ST38	GCA_000711375.1		8
ST38	GCA_000713135.1		8
ST38	GCA_000778895.1		5
ST38	GCA_000780835.1		9
ST38	GCA_000781715.1		9
ST38	GCA_001052705.1		0
ST38	GCA_001059795.1		8
ST38	GCA_001462975.1	blaOXA-48	7
ST38	GCA_001463345.1	blaOXA-48	7
ST38	GCA_001463585.1	blaOXA-48	6
ST38	GCA_001466755.1		4
ST38	GCA_001519245.1		4
ST38	GCA_001519615.1		5
ST38	GCA_001521415.1		0
ST38	GCA_001561735.1		7
ST38	GCA_001749595.1		3
ST38	GCA_001890365.1		8
ST38	GCA_001900295.1		2
ST38	GCA_001942145.1	blaOXA-244	10
ST38	GCA_001981465.1		6
ST38	GCA_002012045.1	blaKPC-2	7
ST38	GCA_002018815.1		5
ST38	GCA_002099695.1		8
ST38	GCA_002104405.1		8
ST38	GCA_002109605.1		0
ST38	GCA_002155385.1	blaOXA-48	7
ST38	GCA_002155515.1	blaOXA-48	7
ST38	GCA_002223705.1	blaIMP-4	6
ST38	GCA_002223865.1		2
ST38	GCA_002224705.1		2
ST38	GCA_002230145.1		8
ST38	GCA_002231735.1		0
ST38	GCA_002240945.1		8
ST38	GCA_002240955.1		7
ST38	GCA_002310595.1		6
ST38	GCA_002407385.1		10
ST38	GCA_002441995.1		9
ST38	GCA_002442325.1		2
ST38	GCA_002442395.1		5
ST38	GCA_002442415.1		9
ST38	GCA_002463095.1		1
ST38	GCA_002463525.1		0
ST38	GCA_002546125.1		4
ST38	GCA_002573205.1		7
ST38	GCA_002573375.1		10
ST38	GCA_002631455.1		1
ST38	GCA_002895295.1		4
ST38	GCA_002901285.1		8
ST38	GCA_002928605.1		8
ST38	GCA_002946715.1	blaOXA-181	12
ST38	GCA_003000595.1		5
ST38	GCA_003145595.1		0
ST38	GCA_003146455.1		0
ST38	GCA_900169685.1	blaOXA-48	2
ST38	GCA_900169935.1	blaOXA-48	7
ST101	GCA_000179095.1		7
ST101	GCA_000179175.1		7
ST101	GCA_000326645.1		0
ST101	GCA_000352485.1		0
ST101	GCA_000488035.1		3
ST101	GCA_000700345.1		0
ST101	GCA_000780075.1		8
ST101	GCA_000780895.1		0
ST101	GCA_000781735.1		4
ST101	GCA_000798295.1		5
ST101	GCA_000798395.1		6
ST101	GCA_000806195.1		7
ST101	GCA_001268545.1		10
ST101	GCA_001268705.1		5
ST101	GCA_001268885.1		11
ST101	GCA_001420165.1		0
ST101	GCA_001463535.1	blaNDM-7	6
ST101	GCA_001607295.1		5
ST101	GCA_001659805.1		0
ST101	GCA_001660545.3		2
ST101	GCA_001713555.1	blaNDM-1	14
ST101	GCA_001713575.1	blaNDM-1	11
ST101	GCA_001748695.1		0
ST101	GCA_001874845.1	blaNDM-1	16
ST101	GCA_001891305.1	blaNDM-9	16
ST101	GCA_001891365.1	blaNDM-5	12
ST101	GCA_001891545.1	blaNDM-9	22
ST101	GCA_001891605.1	blaNDM-9	23
ST101	GCA_001891655.1	blaNDM-5	15
ST101	GCA_001891685.1	blaNDM-5	15
ST101	GCA_001892215.1	blaNDM-5	19
ST101	GCA_001892245.1	blaNDM-5	21
ST101	GCA_001892255.1	blaNDM-9	21
ST101	GCA_001892275.1	blaNDM-5	16
ST101	GCA_001894495.1	blaNDM-5	13
ST101	GCA_001900815.1		9
ST101	GCA_001990865.1		0
ST101	GCA_002011945.1	blaKPC-2	9
ST101	GCA_002055635.1	blaNDM-1	11
ST101	GCA_002152115.1	blaNDM-5	17
ST101	GCA_002163655.1		1
ST101	GCA_002164915.1	blaNDM-5	20
ST101	GCA_002180095.1	blaNDM-1	18
ST101	GCA_002223845.1		0
ST101	GCA_002226065.1		6
ST101	GCA_002228655.1		1
ST101	GCA_002230925.1		6
ST101	GCA_002231955.1		1
ST101	GCA_002233395.1		5
ST101	GCA_002243975.1		5
ST101	GCA_002283695.1		4
ST101	GCA_002324805.1		3
ST101	GCA_002459785.1		4
ST101	GCA_002460775.1		1
ST101	GCA_002463355.1		0
ST101	GCA_002464515.1		8
ST101	GCA_002464595.1		10
ST101	GCA_002464615.1		11
ST101	GCA_002465305.1		5
ST101	GCA_002467995.1		3
ST101	GCA_002474655.1		10
ST101	GCA_002475125.1		0
ST101	GCA_002475375.1		6
ST101	GCA_002485685.1		4
ST101	GCA_002485915.1		1
ST101	GCA_002486855.1		5
ST101	GCA_002510415.1		7
ST101	GCA_002510495.1		3
ST101	GCA_002511055.1		10
ST101	GCA_002511195.1		0
ST101	GCA_002511585.1		0
ST101	GCA_002512115.1		7
ST101	GCA_002512785.1		0
ST101	GCA_002513115.1		5
ST101	GCA_002513145.1		6
ST101	GCA_002513175.1		11
ST101	GCA_002513925.1		5
ST101	GCA_002514465.1		6
ST101	GCA_002518525.1		1
ST101	GCA_002518545.1		0
ST101	GCA_002519035.1		5
ST101	GCA_002521765.1		0
ST101	GCA_002530685.1		4
ST101	GCA_002535585.1		4
ST101	GCA_002536435.1		1
ST101	GCA_002536955.1		0
ST101	GCA_002541435.1		1
ST101	GCA_002542155.1		5
ST101	GCA_002544745.1		2
ST101	GCA_002547485.1		3
ST101	GCA_002549115.1		3
ST101	GCA_002573465.1		4
ST101	GCA_002588135.1		16
ST101	GCA_002787935.1	blaNDM-5	13
ST101	GCA_002809875.1		7
ST101	GCA_002891455.1	blaNDM-5	12
ST101	GCA_002917355.1		6
ST101	GCA_002941445.1		12
ST101	GCA_002991965.1		18
ST101	GCA_002993545.1		0
ST101	GCA_003007825.1	blaNDM-7	5
ST101	GCA_003009145.1		10
ST101	GCA_003009355.1		7
ST101	GCA_003009535.1		18
ST101	GCA_003009695.1		13
ST101	GCA_003010125.1		13
ST101	GCA_003010195.1		15
ST101	GCA_003010335.1		18
ST101	GCA_003048005.1		0
ST101	GCA_003048055.1		0
ST101	GCA_003112045.1		17
ST101	GCA_003144895.1		3
ST101	GCA_900093835.1		13
ST101	GCA_900195955.1		7
ST101	GCA_900236055.1		0
ST131	GCA_000010485.1		0
ST131	GCA_000214765.3		8
ST131	GCA_000285655.3		10
ST131	GCA_000326345.1		11
ST131	GCA_000326365.1		10
ST131	GCA_000350905.1		3
ST131	GCA_000351445.1		5
ST131	GCA_000352005.1		6
ST131	GCA_000352065.1		0
ST131	GCA_000352845.1		10
ST131	GCA_000456225.1		2
ST131	GCA_000457185.1		5
ST131	GCA_000457285.1		0
ST131	GCA_000458075.1		2
ST131	GCA_000458175.1		2
ST131	GCA_000458295.1		0
ST131	GCA_000458665.1		9
ST131	GCA_000458785.1		0
ST131	GCA_000459095.1		1
ST131	GCA_000459155.1		5
ST131	GCA_000485715.1		9
ST131	GCA_000488335.1		1
ST131	GCA_000488375.1		9
ST131	GCA_000488395.1		5
ST131	GCA_000488555.1		4
ST131	GCA_000488695.1		3
ST131	GCA_000488715.1		1
ST131	GCA_000488775.1		7
ST131	GCA_000492255.1		6
ST131	GCA_000493755.1		4
ST131	GCA_000498795.2		3
ST131	GCA_000498815.2		4
ST131	GCA_000506465.2		6
ST131	GCA_000507645.1		0
ST131	GCA_000522145.1	blaKPC-3	7
ST131	GCA_000529555.1		7
ST131	GCA_000529615.1		7
ST131	GCA_000529975.1		7
ST131	GCA_000681435.1	blaNDM-1	9
ST131	GCA_000692435.1		1
ST131	GCA_000692495.1		5
ST131	GCA_000692595.1		10
ST131	GCA_000692615.1		1
ST131	GCA_000692655.1		1
ST131	GCA_000692675.1		9
ST131	GCA_000692695.1		9
ST131	GCA_000692715.1		12
ST131	GCA_000692795.1		13
ST131	GCA_000695505.1		3
ST131	GCA_000699305.1		8
ST131	GCA_000699385.1		12
ST131	GCA_000704345.1		8
ST131	GCA_000704445.1		6
ST131	GCA_000711485.1		6
ST131	GCA_000711555.1		8
ST131	GCA_000713865.1		6
ST131	GCA_000714955.1		9
ST131	GCA_000740535.1		9
ST131	GCA_000770285.1	blaOXA-181	11
ST131	GCA_000776395.1		10
ST131	GCA_000776595.1		7
ST131	GCA_000776835.1		5
ST131	GCA_000776925.1		2
ST131	GCA_000776995.1		1
ST131	GCA_000777395.1		3
ST131	GCA_000777555.1		2
ST131	GCA_000777945.1		2
ST131	GCA_000778475.1		1
ST131	GCA_000778705.1		10
ST131	GCA_000779745.1		5
ST131	GCA_000779775.1		5
ST131	GCA_000779875.1		1
ST131	GCA_000779895.1		8
ST131	GCA_000780135.1		2
ST131	GCA_000780175.1		0
ST131	GCA_000780375.1		9
ST131	GCA_000780395.1		6
ST131	GCA_000780435.1		1
ST131	GCA_000780455.1		8
ST131	GCA_000780495.1		11
ST131	GCA_000780615.1		6
ST131	GCA_000780635.1		0
ST131	GCA_000780815.1		10
ST131	GCA_000781005.1		10
ST131	GCA_000781315.1		0
ST131	GCA_000781335.1		1
ST131	GCA_000781485.1		9
ST131	GCA_000782135.1		12
ST131	GCA_000782195.1		9
ST131	GCA_000782515.1		1
ST131	GCA_000782615.1		5
ST131	GCA_000782675.1		6
ST131	GCA_000782715.1		9
ST131	GCA_000931565.1	blaKPC-3	9
ST131	GCA_001029415.1		13
ST131	GCA_001030305.1		6
ST131	GCA_001030345.1		13
ST131	GCA_001030365.1		5
ST131	GCA_001030625.1		4
ST131	GCA_001053295.1		9
ST131	GCA_001054615.1		5
ST131	GCA_001055105.1		11
ST131	GCA_001055685.1		8
ST131	GCA_001056025.1		10
ST131	GCA_001056205.1		6
ST131	GCA_001056875.1		10
ST131	GCA_001056965.1		2
ST131	GCA_001056975.1		5
ST131	GCA_001057125.1		5
ST131	GCA_001057815.1		12
ST131	GCA_001057895.1		10
ST131	GCA_001058965.1		5
ST131	GCA_001059655.1		7
ST131	GCA_001062415.1		0
ST131	GCA_001063685.1		0
ST131	GCA_001063835.1		11
ST131	GCA_001064885.1		10
ST131	GCA_001182805.1	blaIMP-4	6
ST131	GCA_001182885.1	blaIMP-4	14
ST131	GCA_001306605.1		3
ST131	GCA_001306655.1		1
ST131	GCA_001442595.1		8
ST131	GCA_001463195.1	blaNDM-1	10
ST131	GCA_001469815.1		9
ST131	GCA_001471815.2		8
ST131	GCA_001513615.1		4
ST131	GCA_001513635.1		4
ST131	GCA_001513655.1		8
ST131	GCA_001519915.1		2
ST131	GCA_001519935.1		9
ST131	GCA_001519995.1		8
ST131	GCA_001520035.1		9
ST131	GCA_001520075.1		4
ST131	GCA_001520095.1		1
ST131	GCA_001520295.1		1
ST131	GCA_001520355.1		5
ST131	GCA_001520395.1		0
ST131	GCA_001520405.1		1
ST131	GCA_001520475.1		5
ST131	GCA_001520515.1		10
ST131	GCA_001520535.1		1
ST131	GCA_001520595.1		9
ST131	GCA_001520615.1		9
ST131	GCA_001520635.1		8
ST131	GCA_001520675.1		8
ST131	GCA_001520695.1		1
ST131	GCA_001520755.1		10
ST131	GCA_001520795.1		8
ST131	GCA_001520915.1		9
ST131	GCA_001520975.1		0
ST131	GCA_001521055.1		5
ST131	GCA_001521095.1		0
ST131	GCA_001521135.1		0
ST131	GCA_001521175.1		10
ST131	GCA_001521205.1		1
ST131	GCA_001521335.1		1
ST131	GCA_001521375.1		11
ST131	GCA_001521395.1		6
ST131	GCA_001521495.1		12
ST131	GCA_001521515.1		1
ST131	GCA_001521535.1		5
ST131	GCA_001521555.1		1
ST131	GCA_001521595.1		1
ST131	GCA_001521615.1		2
ST131	GCA_001521655.1		1
ST131	GCA_001521675.1		9
ST131	GCA_001524895.1		9
ST131	GCA_001555495.1		9
ST131	GCA_001555635.1		1
ST131	GCA_001561015.1		1
ST131	GCA_001561025.1		5
ST131	GCA_001561035.1		6
ST131	GCA_001561045.1		0
ST131	GCA_001561115.1		10
ST131	GCA_001561135.1		0
ST131	GCA_001561175.1		2
ST131	GCA_001561195.1		4
ST131	GCA_001561205.1		1
ST131	GCA_001561215.1		4
ST131	GCA_001561275.1		9
ST131	GCA_001561285.1		7
ST131	GCA_001561295.1		9
ST131	GCA_001561335.1		0
ST131	GCA_001561355.1		1
ST131	GCA_001561365.1		0
ST131	GCA_001561375.1		0
ST131	GCA_001561415.1		2
ST131	GCA_001561435.1		2
ST131	GCA_001561455.1		0
ST131	GCA_001561495.1		8
ST131	GCA_001561505.1		3
ST131	GCA_001561555.1		0
ST131	GCA_001561605.1		11
ST131	GCA_001561685.1		9
ST131	GCA_001561705.1		4
ST131	GCA_001561755.1		5
ST131	GCA_001561785.1		5
ST131	GCA_001561865.1		9
ST131	GCA_001562345.1		9
ST131	GCA_001562385.1		7
ST131	GCA_001563415.1		5
ST131	GCA_001566615.1		0
ST131	GCA_001566635.1		6
ST131	GCA_001566655.1		5
ST131	GCA_001566675.1		10
ST131	GCA_001577325.1		2
ST131	GCA_001601655.1		7
ST131	GCA_001605825.2	blaNDM-1	21
ST131	GCA_001617565.1	blaIMP-14	16
ST131	GCA_001618325.1	blaOXA-48	3
ST131	GCA_001618345.2	blaOXA-48	0
ST131	GCA_001618365.1	blaOXA-163	11
ST131	GCA_001620905.1		8
ST131	GCA_001620925.1		2
ST131	GCA_001620935.1		4
ST131	GCA_001621035.1		1
ST131	GCA_001621205.1		11
ST131	GCA_001621245.1		10
ST131	GCA_001621265.1		4
ST131	GCA_001621275.1		5
ST131	GCA_001621305.1		10
ST131	GCA_001621325.1		10
ST131	GCA_001621355.1		0
ST131	GCA_001621415.1		9
ST131	GCA_001621485.1		2
ST131	GCA_001621515.1		2
ST131	GCA_001621565.1		9
ST131	GCA_001621575.1		2
ST131	GCA_001621705.1		9
ST131	GCA_001621725.1		2
ST131	GCA_001621745.1		5
ST131	GCA_001621755.1		8
ST131	GCA_001621765.1		10
ST131	GCA_001621805.1		2
ST131	GCA_001621825.1		9
ST131	GCA_001621835.1		11
ST131	GCA_001621855.1		4
ST131	GCA_001621945.1		11
ST131	GCA_001621965.1		9
ST131	GCA_001621975.1		1
ST131	GCA_001622045.1		1
ST131	GCA_001630915.1		6
ST131	GCA_001630975.1		12
ST131	GCA_001637845.1		3
ST131	GCA_001637865.1		9
ST131	GCA_001637885.1		12
ST131	GCA_001637895.1		0
ST131	GCA_001637905.1		8
ST131	GCA_001637945.1		1
ST131	GCA_001637965.1		0
ST131	GCA_001637985.1		6
ST131	GCA_001638025.1		6
ST131	GCA_001638045.1		1
ST131	GCA_001638055.1		2
ST131	GCA_001638065.1		9
ST131	GCA_001638075.1		1
ST131	GCA_001638125.1		9
ST131	GCA_001638155.1		11
ST131	GCA_001638165.1		5
ST131	GCA_001638205.1		3
ST131	GCA_001638225.1		3
ST131	GCA_001640205.1		4
ST131	GCA_001640245.1		11
ST131	GCA_001641805.1		5
ST131	GCA_001647315.1		6
ST131	GCA_001647325.1		7
ST131	GCA_001647335.1		1
ST131	GCA_001647345.1		0
ST131	GCA_001647395.1		10
ST131	GCA_001648715.1		0
ST131	GCA_001661055.2		7
ST131	GCA_001675705.1		0
ST131	GCA_001676995.1		15
ST131	GCA_001855185.1		10
ST131	GCA_001874485.1		11
ST131	GCA_001874785.1	blaKPC-3	7
ST131	GCA_001940375.1		10
ST131	GCA_002001525.1		1
ST131	GCA_002001945.1		2
ST131	GCA_002011965.1	blaKPC-2	1
ST131	GCA_002012025.1	blaKPC-2	1
ST131	GCA_002012065.1	blaKPC-2	5
ST131	GCA_002012085.1	blaKPC-2	11
ST131	GCA_002012145.1	blaKPC-2	6
ST131	GCA_002012205.1	blaKPC-3	10
ST131	GCA_002012245.1	blaKPC-2	12
ST131	GCA_002012265.1	blaKPC-3	11
ST131	GCA_002012305.1	blaKPC-2	10
ST131	GCA_002056635.1	blaKPC-4	12
ST131	GCA_002087465.1		9
ST131	GCA_002104485.1		9
ST131	GCA_002120205.1		0
ST131	GCA_002142715.1	blaNDM-1	9
ST131	GCA_002152075.1		5
ST131	GCA_002152175.1		0
ST131	GCA_002153005.1		9
ST131	GCA_002163295.1		11
ST131	GCA_002165955.1		3
ST131	GCA_002180195.1		10
ST131	GCA_002180815.1		1
ST131	GCA_002181625.1	blaKPC-2	8
ST131	GCA_002202175.1	blaNDM-1	11
ST131	GCA_002223475.1	blaIMP-4	4
ST131	GCA_002223495.1	blaIMP-4	4
ST131	GCA_002223565.1	blaKPC-2	12
ST131	GCA_002223935.1		12
ST131	GCA_002224745.1		0
ST131	GCA_002224795.1		7
ST131	GCA_002230095.1		0
ST131	GCA_002239795.1		9
ST131	GCA_002243765.1		0
ST131	GCA_002244115.1		9
ST131	GCA_002244615.1		11
ST131	GCA_002244995.1		5
ST131	GCA_002248225.1		8
ST131	GCA_002248265.1		11
ST131	GCA_002248905.1		9
ST131	GCA_002249065.1		10
ST131	GCA_002284685.1		12
ST131	GCA_002407315.1		6
ST131	GCA_002407375.1		9
ST131	GCA_002416765.1		4
ST131	GCA_002416785.1		12
ST131	GCA_002416875.1		6
ST131	GCA_002416935.1		5
ST131	GCA_002442015.1		6
ST131	GCA_002442165.1		5
ST131	GCA_002456695.1		10
ST131	GCA_002467885.1		9
ST131	GCA_002507455.1		7
ST131	GCA_002507485.1		11
ST131	GCA_002507495.1		3
ST131	GCA_002510165.1		11
ST131	GCA_002520015.1		4
ST131	GCA_002528825.1		13
ST131	GCA_002528895.1		5
ST131	GCA_002528925.1		12
ST131	GCA_002535405.1		3
ST131	GCA_002536105.1		8
ST131	GCA_002573265.1		1
ST131	GCA_002588125.1	blaNDM-1	8
ST131	GCA_002631585.1		7
ST131	GCA_002682855.1		9
ST131	GCA_002749835.1		7
ST131	GCA_002764015.1		4
ST131	GCA_002855635.1	blaOXA-48	1
ST131	GCA_002855675.1	blaOXA-48	3
ST131	GCA_002855715.1	blaOXA-48	7
ST131	GCA_002885875.1		8
ST131	GCA_002886245.1	blaKPC-2	1
ST131	GCA_002886295.1	blaKPC-2	12
ST131	GCA_002886325.1	blaKPC-2	12
ST131	GCA_002886445.1	blaKPC-3	9
ST131	GCA_002886475.1	blaKPC-3	14
ST131	GCA_002886525.1	blaKPC-2	11
ST131	GCA_002886545.1	blaKPC-2	5
ST131	GCA_002886725.1	blaKPC-3	9
ST131	GCA_002886825.1	blaKPC-3	5
ST131	GCA_002886915.1	blaKPC-3	6
ST131	GCA_002887175.1	blaKPC-2	9
ST131	GCA_002917565.1		5
ST131	GCA_002918065.1		9
ST131	GCA_002918765.1	blaKPC-2	11
ST131	GCA_002936145.1	blaKPC-2	5
ST131	GCA_002936495.1		8
ST131	GCA_002972715.1		0
ST131	GCA_002973175.1		0
ST131	GCA_002996945.1		2
ST131	GCA_003000675.1		4
ST131	GCA_003007995.1	blaNDM-1	16
ST131	GCA_003008245.1	blaNDM-5	7
ST131	GCA_003027505.1		0
ST131	GCA_003028695.1		0
ST131	GCA_003122025.1		1
ST131	GCA_003144925.1		1
ST131	GCA_003145935.1		0
ST131	GCA_003175395.1		1
ST131	GCA_003175555.1		1
ST131	GCA_003175575.1		0
ST131	GCA_003176455.1		6
ST131	GCA_003181035.1		11
ST131	GCA_003194345.1	blaIMP-4	11
ST131	GCA_003203395.1		7
ST131	GCA_003203415.1		1
ST131	GCA_003206175.1		10
ST131	GCA_003226175.1		7
ST131	GCA_003226185.1		6
ST131	GCA_900007315.1		13
ST131	GCA_900041715.1		6
ST131	GCA_900119685.1		9
ST131	GCA_900166705.1		5
ST131	GCA_900166765.1		5
ST131	GCA_900166815.1		6
ST131	GCA_900196295.1		11
ST131	GCA_900239805.1		12
ST131	GCA_900239825.1		17
ST131	GCA_900239855.1		5
ST131	GCA_900239865.1		4
ST131	GCA_900239875.1		8
ST131	GCA_900239885.1		12
ST131	GCA_900239895.1		8
ST131	GCA_900239905.1		9
ST156	GCA_000010385.1		1
ST156	GCA_000164375.1		8
ST156	GCA_000355275.2		2
ST156	GCA_000356105.2		5
ST156	GCA_000356565.1		2
ST156	GCA_000357845.2		2
ST156	GCA_000357865.2		2
ST156	GCA_000357885.2		2
ST156	GCA_000357905.2		2
ST156	GCA_000358435.2		2
ST156	GCA_000358455.2		2
ST156	GCA_000358475.1		2
ST156	GCA_000358495.2		2
ST156	GCA_000358515.2		2
ST156	GCA_000358535.2		2
ST156	GCA_000358955.2		2
ST156	GCA_000358995.1		2
ST156	GCA_000359015.2		2
ST156	GCA_000359035.2		2
ST156	GCA_000692755.1		1
ST156	GCA_000797695.1		5
ST156	GCA_000798315.1		5
ST156	GCA_000798455.1		9
ST156	GCA_001402805.1		7
ST156	GCA_001637625.1		0
ST156	GCA_001644175.1	blaNDM-5	14
ST156	GCA_001891395.1	blaNDM-9	15
ST156	GCA_001891625.1	blaNDM-5	12
ST156	GCA_001891975.1	blaNDM-9	16
ST156	GCA_001891995.1	blaNDM-1	21
ST156	GCA_001892025.1	blaNDM-9	25
ST156	GCA_001892045.1	blaNDM-9	15
ST156	GCA_001892065.1	blaNDM-1	20
ST156	GCA_001892105.1	blaNDM-1	25
ST156	GCA_001892355.1	blaNDM-9	15
ST156	GCA_001892645.1	blaNDM-9	19
ST156	GCA_001892675.1	blaNDM-9	26
ST156	GCA_001892725.1	blaNDM-9	26
ST156	GCA_001892845.1	blaNDM-9	12
ST156	GCA_001892955.1	blaNDM-9	12
ST156	GCA_001893005.1	blaNDM-9	17
ST156	GCA_001893165.1	blaNDM-5	18
ST156	GCA_001894075.1	blaNDM-9	16
ST156	GCA_001894255.1	blaNDM-5	14
ST156	GCA_001894475.1	blaNDM-1	25
ST156	GCA_001894555.1	blaNDM-1	13
ST156	GCA_001894585.1		27
ST156	GCA_001894715.1		23
ST156	GCA_001907935.1		12
ST156	GCA_002165095.1	blaNDM-5	14
ST156	GCA_002196615.1		21
ST156	GCA_002216895.1		14
ST156	GCA_002226175.1		4
ST156	GCA_002244835.1		0
ST156	GCA_002474645.1		12
ST156	GCA_002510665.1		0
ST156	GCA_002517405.1		8
ST156	GCA_002517425.1		9
ST156	GCA_002518865.1		0
ST156	GCA_002547825.1		1
ST156	GCA_002736085.1		11
ST156	GCA_002860085.1	blaNDM-1	26
ST156	GCA_002941225.1		17
ST156	GCA_002941665.1		20
ST156	GCA_002942735.1		14
ST156	GCA_003008945.1		12
ST156	GCA_003009505.1		23
ST156	GCA_003010015.1		4
ST156	GCA_003010095.1		17
ST156	GCA_003073875.1		8
ST156	GCA_003122105.1		15
ST156	GCA_900093925.1		10
ST156	GCA_900093945.1		18
ST167	DRR075623	blaNDM-5	13
ST167	DRR075640	blaNDM-5	7
ST167	ERR1148553		12
ST167	ERR119473		6
ST167	ERR1195513		6
ST167	ERR1204985		13
ST167	ERR1205075		15
ST167	ERR1211731		10
ST167	ERR1217011		13
ST167	ERR1263946	blaOXA-48	9
ST167	ERR1585712		20
ST167	ERR1585801		9
ST167	ERR1617891		10
ST167	ERR1618013		9
ST167	ERR1618453		10
ST167	ERR1618796		8
ST167	ERR1618874		13
ST167	ERR1619006		15
ST167	ERR1619045		11
ST167	ERR1619298		12
ST167	ERR1619303		11
ST167	ERR1623360		16
ST167	ERR1640767		13
ST167	ERR1718924		3
ST167	ERR1852627		13
ST167	ERR1891284		8
ST167	ERR1937114		14
ST167	ERR1937141		10
ST167	ERR1937185		15
ST167	ERR1937478		11
ST167	ERR1946758		13
ST167	ERR1946850		10
ST167	ERR1949102		8
ST167	ERR1971352		3
ST167	ERR1971367		9
ST167	ERR1971401		9
ST167	ERR1971471		2
ST167	ERR1971661		7
ST167	ERR1971706		6
ST167	ERR296631		13
ST167	ERR434298		11
ST167	ERR435071		3
ST167	ERR435237		13
ST167	ERR435383		14
ST167	ERR439728		10
ST167	ERR474034		13
ST167	ERR474037		7
ST167	ERR486693		7
ST167	ERR486694		13
ST167	ERR587005		11
ST167	ERR712515		12
ST167	ERR712617		9
ST167	ERR712662		15
ST167	ERR712691		11
ST167	ERR712769		12
ST167	ERR926381		7
ST167	ERR926425		14
ST167	ERR987393		7
ST167	ESC_EA6176AA	blaOXA-181	12
ST167	GCA_000529355.1		14
ST167	GCA_001030425	blaKPC-3	10
ST167	GCA_001316875.2	blaNDM-5	7
ST167	GCA_001509675	blaNDM-5	14
ST167	GCA_001562375		8
ST167	GCA_001576435		7
ST167	GCA_001597815	blaNDM-7	2
ST167	GCA_001597825		8
ST167	GCA_001713545.1	blaNDM-5	14
ST167	GCA_001891615	blaNDM-5	17
ST167	GCA_001893025	blaNDM-9	13
ST167	GCA_001911665.1		6
ST167	GCA_002024905	blaKPC-2	13
ST167	GCA_002152065	blaNDM-5	11
ST167	GCA_002154185.1		16
ST167	GCA_002155315.1	blaOXA-48	10
ST167	GCA_002155365.1	blaOXA-48	11
ST167	GCA_002155585.1		8
ST167	GCA_002164955	blaNDM-5	18
ST167	GCA_002165055	blaNDM-5	13
ST167	GCA_002182025.1		12
ST167	GCA_002188315		16
ST167	GCA_002217035.1		16
ST167	GCA_002265005.1	blaNDM-5	9
ST167	GCA_002265025.1	blaNDM-5	12
ST167	GCA_002265035.1	blaNDM-5	17
ST167	GCA_002265155.1	blaNDM-5	13
ST167	GCA_002290265		0
ST167	GCA_002358075.1	blaKPC-3	15
ST167	GCA_002811605	blaNDM-7	19
ST167	GCA_002860105.1	blaNDM-5	20
ST167	GCA_002870165	blaNDM-5	9
ST167	GCA_002903125.1	blaNDM-5	14
ST167	GCA_002967855.1	blaNDM-5	12
ST167	GCA_002967865.1	blaNDM-5	16
ST167	GCA_002967885.1	blaNDM-5	10
ST167	GCA_002967935.1	blaNDM-5	15
ST167	GCA_002967955.1	blaNDM-5	16
ST167	GCA_003000615.1	blaNDM-1	5
ST167	GCA_003008135.1	blaNDM-5	8
ST167	GCA_003008175.1	blaNDM-5	9
ST167	GCA_003008195.1		0
ST167	GCA_003008215.1	blaNDM-5	13
ST167	GCA_003008315.1		0
ST167	GCA_003008345.1	blaNDM-5	10
ST167	GCA_003008375.1	blaNDM-4	9
ST167	GCA_003028815.1		0
ST167	GCA_003073835.1		19
ST167	GCA_003186665.1	blaNDM-5	11
ST167	GCF_001610755		22
ST167	GCF_001860505	blaNDM-1	7
ST167	SRR088906		1
ST167	SRR088913		9
ST167	SRR1314258		12
ST167	SRR1314503		12
ST167	SRR1508895	blaNDM-1	8
ST167	SRR1815446		3
ST167	SRR2131466		4
ST167	SRR3051052	blaNDM-7	9
ST167	SRR3051056	blaOXA-48	3
ST167	SRR3051075		10
ST167	SRR3095388		9
ST167	SRR3098780		11
ST167	SRR3112265		5
ST167	SRR3222296	blaOXA-181	11
ST167	SRR3492237		13
ST167	SRR3615372	blaNDM-5	9
ST167	SRR3929081	blaNDM-7	10
ST167	SRR3951679		10
ST167	SRR4025997	blaNDM-7	1
ST167	SRR4294836		11
ST167	SRR5024314		2
ST167	SRR5153281	blaNDM-5	12
ST167	SRR5153282	blaNDM-5	13
ST167	SRR5153283	blaNDM-5	16
ST167	SRR5153286	blaNDM-5	8
ST167	SRR5714074	blaNDM-5 and blaOXA-232	12
ST167	SRR5750458	blaNDM-5	7
ST167	SRR5750477	blaNDM-7	9
ST167	SRR5884783	blaNDM-5	11
ST405	GCA_000407845.1		0
ST405	GCA_000456365.1		4
ST405	GCA_000456945.1		8
ST405	GCA_000459895.1		7
ST405	GCA_000485615.1		8
ST405	GCA_000488455.1		5
ST405	GCA_000498835.2		5
ST405	GCA_000522325.1		11
ST405	GCA_000692635.1		8
ST405	GCA_000740615.1		2
ST405	GCA_000778585.1		5
ST405	GCA_000779275.1		13
ST405	GCA_000781675.1		5
ST405	GCA_001030515.1	blaKPC-2	9
ST405	GCA_001030595.1		7
ST405	GCA_001032735.1		5
ST405	GCA_001059715.1		7
ST405	GCA_001443175.1		4
ST405	GCA_001462925.1	blaOXA-48	5
ST405	GCA_001519515.1		7
ST405	GCA_001520175.1		9
ST405	GCA_001521475.1		7
ST405	GCA_001615615.1		14
ST405	GCA_001615805.1		4
ST405	GCA_001616285.1		13
ST405	GCA_001620915.1		8
ST405	GCA_001621145.1		7
ST405	GCA_001622055.1		8
ST405	GCA_001696775.1	blaNDM-5	11
ST405	GCA_001713625.1	blaNDM-5	10
ST405	GCA_001910475.1		10
ST405	GCA_002001705.1		2
ST405	GCA_002001975.1		2
ST405	GCA_002002845.1		1
ST405	GCA_002116485.1		8
ST405	GCA_002116495.1		6
ST405	GCA_002116565.1		9
ST405	GCA_002142675.1	blaNDM-1	14
ST405	GCA_002152135.1	blaNDM-1	11
ST405	GCA_002155755.1		6
ST405	GCA_002155845.1	blaNDM-5	12
ST405	GCA_002164635.2	blaNDM-4	14
ST405	GCA_002190975.1		0
ST405	GCA_002223485.1		9
ST405	GCA_002223545.1		16
ST405	GCA_002223555.1		10
ST405	GCA_002223635.1		17
ST405	GCA_002223665.1	blaIMP-4	9
ST405	GCA_002224715.1		5
ST405	GCA_002407285.1		10
ST405	GCA_002460475.1		0
ST405	GCA_002464185.1		8
ST405	GCA_002465815.1		0
ST405	GCA_002468745.1		8
ST405	GCA_002486325.1		11
ST405	GCA_002513525.1		7
ST405	GCA_002522785.1		3
ST405	GCA_002591135.1	blaNDM-5	7
ST405	GCA_002787215.1		14
ST405	GCA_002788115.1		15
ST405	GCA_002967875.1	blaNDM-5	16
ST405	GCA_002968735.1		9
ST405	GCA_003007915.1	blaNDM-5	13
ST405	GCA_003007935.1	blaNDM-5	13
ST405	GCA_003007955.1		8
ST405	GCA_003007965.1	blaNDM-5	7
ST405	GCA_003008235.1	blaNDM-5	12
ST405	GCA_003057435.1		8
ST405	GCA_003057445.1		9
ST405	GCA_003114975.1	blaNDM-1	6
ST405	GCA_003175655.1		15
ST405	GCA_003176415.1		2
ST405	GCA_003180995.1		14
ST410	GCA_900488855	blaOXA-48	9
ST410	GCA_900488875	blaOXA-181	16
ST410	GCA_900488885	blaNDM-4	12
ST410	GCA_900488905	blaOXA-181	15
ST410	GCA_900488925	blaNDM-5	18
ST410	GCA_900488955	blaOXA-181	13
ST410	GCA_900488985	blaOXA-181	15
ST410	GCA_900489045	blaOXA-181	15
ST410	GCA_900489065	blaOXA-181	10
ST410	GCA_900489145	blaOXA-181	5
ST410	GCA_900489185	blaOXA-181	2
ST410	GCA_900489195	blaOXA-181	9
ST410	GCA_900489225	blaOXA-181	15
ST410	GCA_900489245	blaOXA-48	10
ST410	GCA_900489285	blaOXA-181	15
ST410	GCA_900489305	blaOXA-181	16
ST410	GCA_900489315	blaOXA-181	7
ST410	GCA_900489325	blaOXA-181;blaNDM-5	15
ST410	GCA_900489345	blaOXA-181	12
ST410	GCA_900489355	blaOXA-181	15
ST410	GCA_900489375	blaOXA-181	15
ST410	GCA_900489385	blaOXA-181	16
ST410	GCA_900489395	blaOXA-181	14
ST410	GCA_900489415	blaOXA-181	12
ST410	GCA_900489425	blaOXA-181	13
ST410	GCA_900489435	blaOXA-48	2
ST410	GCA_900489455	blaOXA-181	15
ST410	GCA_900489535	blaOXA-181	15
ST410	GCA_900489585	blaOXA-181	9
ST410	GCA_900489605	blaOXA-181	9
ST410	GCA_900489635	blaOXA-181	9
ST410	GCA_900489645	blaOXA-181	10
ST410	GCA_900489735		13
ST410	GCA_900489745		6
ST410	GCA_900489755	blaOXA-181	15
ST410	GCA_900489775	blaOXA-181	14
ST410	GCA_900489815		6
ST410	GCA_900490435	blaOXA-181	15
ST410	GCA_900490445	blaOXA-181	16
ST410	ERR1036086		7
ST410	ERR119390		6
ST410	ERR1197943		8
ST410	ERR1197947		7
ST410	ERR1197948		10
ST410	ERR1197949		5
ST410	ERR1197952		8
ST410	ERR1197954		6
ST410	ERR1197960		9
ST410	ERR1197961		15
ST410	ERR1197963		10
ST410	ERR1197964		9
ST410	ERR1197965		6
ST410	ERR1197967		6
ST410	ERR1197968		11
ST410	ERR1202023		13
ST410	ERR1218604		4
ST410	ERR1218627		7
ST410	ERR1218707		10
ST410	ERR1218718		12
ST410	ERR1228320	blaOXA-48	11
ST410	ERR1351670	blaNDM-1	4
ST410	ERR1374952	blaOXA-181	15
ST410	ERR1656423		0
ST410	ERR434570		11
ST410	ERR435231		9
ST410	ERR435371		0
ST410	ERR439538		11
ST410	ERR439619		5
ST410	ERR440760	blaNDM-1	10
ST410	ERR440768	blaNDM-1	9
ST410	ERR474172		10
ST410	ERR486710		11
ST410	ERR712511		4
ST410	ERR712587		9
ST410	ERR712635		10
ST410	ERR712668		8
ST410	ERR712775		1
ST410	ERR998774		6
ST410	ERZ665719	blaOXA-181	15
ST410	GCA_000488615.1		9
ST410	GCA_000804345.1		11
ST410	GCA_000987525.1		8
ST410	GCA_000987545.1		9
ST410	GCA_000987555.1		8
ST410	GCA_001463385.1	blaOXA-181	15
ST410	GCA_001615675.1		8
ST410	GCA_001616385.1		14
ST410	GCA_001885555.1		8
ST410	GCA_001894125.1	blaNDM-1	16
ST410	GCA_001894635.1		10
ST410	GCA_001899625.1		10
ST410	GCA_002155455.1	blaOXA-48	6
ST410	GCA_002155535.1	blaOXA-48	3
ST410	GCA_002155775.1	blaOXA-181	13
ST410	GCA_002164865.1	blaNDM-5	9
ST410	GCA_002164975.1	blaNDM-5	14
ST410	GCA_002165115.1	blaNDM-5	3
ST410	GCA_002166535.1		3
ST410	GCA_002216975.1		17
ST410	GCA_002217135.1		8
ST410	GCA_002222945.1		11
ST410	GCA_002223465.1		6
ST410	GCA_002223655.1		9
ST410	GCA_002223985.1		8
ST410	GCA_002226545.1		3
ST410	GCA_002442095.1		1
ST410	GCA_002486495.1		0
ST410	GCA_002510175.1		16
ST410	GCA_002519755.1		5
ST410	GCA_002589795.1	blaOXA-181+NDM-5	13
ST410	GCA_002803905.1	blaOXA-181+NDM-5	18
ST410	GCA_002811555.1	blaNDM-5	27
ST410	GCA_002941305.1		11
ST410	GCA_002953455.1	blaOXA-181+NDM-5	18
ST410	GCA_003008025.1	blaOXA-181+NDM-5	16
ST410	GCA_003008055.1		14
ST410	GCA_003008085.1	blaNDM-5	7
ST410	GCA_003008275.1	blaNDM-5	15
ST410	GCA_003008295.1	blaOXA-181	15
ST410	GCA_003027435.1		0
ST410	GCA_003073815.1		6
ST410	GCA_003073955.1		6
ST410	GCA_900166845.1		11
ST410	LBBD00000000		6
ST410	LJGD00000000		8
ST410	LJGE00000000		5
ST410	LJGF00000000		9
ST410	LJGG00000000		8
ST410	LJGI01000000		8
ST410	LJGJ00000000		6
ST410	LJGK00000000		8
ST410	LT594504		2
ST410	NZ_CP013112		0
ST410	SRR1178257		5
ST410	SRR1180980		4
ST410	SRR1186782		5
ST410	SRR1508875		12
ST410	SRR2724080	blaNDM-1	6
ST410	SRR2724128	blaVIM	10
ST410	SRR2970227		0
ST410	SRR3098818		6
ST410	SRR3971177		0
ST410	SRR3982152		8
ST410	SRR3987591		0
ST410	SRR3999067	blaKPC-2	8
ST410	SRR3999074	blaKPC-3	9
ST410	SRR4017857		3
ST410	SRR4017900		11
ST410	SRR4017926	blaKPC-3	9
ST410	SRR4035121		6
ST410	SRR4065662	blaKPC-3	5
ST410	SRR4262712		5
ST410	SRR4262794		5
ST410	SRR643055		5
ST410	SRR647312		5
ST410	SRR958486		2
ST617	GCA_000488735.1		3
ST617	GCA_000776255.1		9
ST617	GCA_000782095.1		7
ST617	GCA_001420055.1		13
ST617	GCA_001463325.1	blaNDM-1	21
ST617	GCA_001611705.1	blaOXA-48	8
ST617	GCA_001886575.1		13
ST617	GCA_001892325.1	blaNDM-1	25
ST617	GCA_001892335.1	blaNDM-5	16
ST617	GCA_001892745.1	blaNDM-5	17
ST617	GCA_001894145.1	blaNDM-1	28
ST617	GCA_001900835.1		13
ST617	GCA_002142695.1	blaNDM-9	8
ST617	GCA_002155825.1		9
ST617	GCA_002192275.1	blaKPC-3	9
ST617	GCA_002223015.1	blaKPC-2	8
ST617	GCA_002224785.1		8
ST617	GCA_002232295.1		11
ST617	GCA_002250175.1		13
ST617	GCA_002284785.1		7
ST617	GCA_002407305.1		14
ST617	GCA_002463635.1		11
ST617	GCA_002528845.1		11
ST617	GCA_002573175.1		4
ST617	GCA_002588385.1	blaNDM-5	9
ST617	GCA_002835565.1		8
ST617	GCA_002850675.2	blaNDM-5	4
ST617	GCA_002872125.1		12
ST617	GCA_003008335.1	blaNDM-5	14
ST617	GCA_003009615.1	blaNDM-1	20
ST617	GCA_003030365.1	blaNDM-5	11
ST617	GCA_003051985.1	blaNDM-5	14
ST617	GCA_900015405.1		1
ST648	GCA_000474825.1	blaKPC-2	9
ST648	GCA_000503515.1		9
ST648	GCA_000506485.2		8
ST648	GCA_000513375.1		8
ST648	GCA_000522105.1	blaKPC-2	6
ST648	GCA_000586515.1		13
ST648	GCA_000692515.1		14
ST648	GCA_000779395.1		5
ST648	GCA_000784925.1	blaKPC-2	14
ST648	GCA_000814525.1	blaNDM-5	8
ST648	GCA_001484295.1		7
ST648	GCA_001485455.1		7
ST648	GCA_001519945.1		4
ST648	GCA_001520335.1		8
ST648	GCA_001611725.1	blaKPC-2	15
ST648	GCA_001642295.1		17
ST648	GCA_001651615.1		9
ST648	GCA_001721525.1	blaNDM-1	12
ST648	GCA_001893135.1	blaNDM-5	19
ST648	GCA_002002145.1		2
ST648	GCA_002012225.1	blaKPC-2	14
ST648	GCA_002087555.1		1
ST648	GCA_002116545.1		3
ST648	GCA_002152995.1	blaKPC-2	5
ST648	GCA_002155205.1		6
ST648	GCA_002193385.1		10
ST648	GCA_002224755.1		11
ST648	GCA_002241025.1		10
ST648	GCA_002310695.1		2
ST648	GCA_002417555.1		10
ST648	GCA_002474895.1		11
ST648	GCA_002508045.1		10
ST648	GCA_002508125.1		10
ST648	GCA_002508205.1		10
ST648	GCA_002511295.1		8
ST648	GCA_002516505.1		2
ST648	GCA_002536095.1		14
ST648	GCA_002573155.1		1
ST648	GCA_002587005.1		12
ST648	GCA_002736735.1		7
ST648	GCA_002736745.1		8
ST648	GCA_002887055.1	blaKPC-2	4
ST648	GCA_002901295.1		10
ST648	GCA_002926955.1		7
ST648	GCA_002926975.1		6
ST648	GCA_002927655.1		10
ST648	GCA_002927665.1		2
ST648	GCA_002927695.1		12
ST648	GCA_002927715.1		13
ST648	GCA_002927735.1		11
ST648	GCA_002927755.1		10
ST648	GCA_003194265.1	blaNDM-7	12

## Sheet: Fig S1
Data for additional file 7 (Fig. S1) Number of antibiotic resistance genes (ARG) according to the phylogenetic group among E. coli ST410 isolates.
Group	Assembly	Name	carbapenemase	Number of ARG carbapenemase gene excluded
OXA181	GCA_002803905.1	AMA1167	blaOXA-181+NDM-5	18
BASAL	GCA_900489745	ANSES29401		6
BASAL	GCA_900489815	ANSES30599		6
FQR	GCA_900489735	ANSES32139		13
FQR	GCA_003073955.1	AR434		6
FQR	GCA_003073815.1	AR437		6
FQR	GCA_001885555.1	AST_082		8
OXA181	GCA_002155775.1	AUH_IMP194	blaOXA-181	13
FQR	GCA_002155455.1	AUH_IMP200	blaOXA-48	6
FQR	GCA_002155535.1	AUH_IMP319	blaOXA-48	3
FQR	GCA_000987545.1	avian5		9
OXA181	GCA_003008025.1	B12243	blaOXA-181+NDM-5	16
OXA181	GCA_003008275.1	B32065	blaNDM-5	15
OXA181	GCA_003008295.1	BA22372	blaOXA-181	15
OXA181	GCA_003008055.1	BA7390		14
FQR	GCA_000987525.1	BE127		8
FQR	GCA_003008085.1	BV643	blaNDM-5	7
FQR	GCA_900488885	CNR17I10	blaNDM-4	12
FQR	GCA_900488855	CNR1J3	blaOXA-48	9
OXA181	GCA_900488875	CNR34E8	blaOXA-181	16
OXA181	GCA_900488905	CNR38E10	blaOXA-181	15
OXA181	GCA_900488955	CNR40H9	blaOXA-181	13
OXA181	GCA_900488985	CNR47F2	blaOXA-181	15
FQR	GCA_900488925	CNR49A5	blaNDM-5	18
OXA181	GCA_900489065	CNR59F5	blaOXA-181	10
BASAL	GCA_900489245	CNR60F5	blaOXA-48	10
OXA181	GCA_900489045	CNR61A10	blaOXA-181	15
OXA181	GCA_900490445	CNR61D1	blaOXA-181	16
OXA181	GCA_900489145	CNR63G9	blaOXA-181	5
OXA181	GCA_900489225	CNR64C4	blaOXA-181	15
OXA181	GCA_900489195	CNR67B6	blaOXA-181	9
OXA181	GCA_900489185	CNR78B2	blaOXA-181	2
OXA181	GCA_900489325	CNR78B4	blaOXA-181;blaNDM-5	15
OXA181	GCA_900489315	CNR78B6	blaOXA-181	7
OXA181	GCA_900489425	CNR78F5	blaOXA-181	13
OXA181	GCA_900489285	CNR79J3	blaOXA-181	15
OXA181	GCA_900489305	CNR81C8	blaOXA-181	16
OXA181	GCA_900489415	CNR82A2	blaOXA-181	12
OXA181	GCA_900489455	CNR82B7	blaOXA-181	15
OXA181	GCA_900489385	CNR84G4	blaOXA-181	16
OXA181	GCA_900489535	CNR85J3	blaOXA-181	15
OXA181	GCA_900489355	CNR89H2	blaOXA-181	15
OXA181	GCA_900489345	CNR92B5	blaOXA-181	12
FQR	GCA_900489585	CNR92B7	blaOXA-181	9
FQR	GCA_900489635	CNR93G1	blaOXA-181	9
FQR	GCA_900489605	CNR94G8	blaOXA-181	9
OXA181	GCA_900490435	CNR96C1	blaOXA-181	15
OXA181	GCA_900489645	CNR96F5	blaOXA-181	10
FQR	GCA_900489435	CNRC10O53	blaOXA-48	2
FQR	GCA_002216975.1	CoR-20		17
FQR	GCA_002223985.1	CoR-35		8
FQR	GCA_002217135.1	CoR-37		8
FQR	SRR3982152	DHQP1202929		8
FQR	SRR4017857	DHQP1400936		3
FQR	SRR4017900	DHQP1401543		11
FQR	SRR4017926	DHQP1401702	blaKPC-3	9
FQR	SRR4035121	DHQP1401959		6
FQR	SRR4065662	DHQP1500326	blaKPC-3	5
FQR	ERR1197947	E003488		7
FQR	ERR1197948	E006910		10
BASAL	ERR119390	E351		6
NA	ERZ665719	Ec-MAD	blaOXA-181	15
FQR	GCA_000804345.1	EC13		11
FQR	ERR712775	Ec1357		1
BASAL	GCA_002442095.1	EC30_Esco_HA-NL		1
FQR	ERR712511	Ec386		4
FQR	GCA_000987555.1	EC46pz		8
OXA181	GCA_001463385.1	EC50816743	blaOXA-181	15
FQR	SRR2724128	EC50822286	blaVIM	10
FQR	GCA_001894125.1	Ec713	blaNDM-1	16
FQR	GCA_001894635.1	Ec717		10
FQR	ERR712587	Ec772		9
FQR	GCA_000488615.1	Ec908555		9
FQR	ERR712635	Ec943		10
FQR	ERR712668	Ec979		8
FQR	GCA_001899625.1	EcC153		10
FQR	GCA_900166845.1	EcIsolate21		11
OXA181	GCA_900489375	EcLb317	blaOXA-181	15
OXA181	GCA_900489395	EcLb474	blaOXA-181	14
OXA181	GCA_900489755	EcLb504	blaOXA-181	15
OXA181	GCA_900489775	EcLb534	blaOXA-181	14
FQR	ERR1197943	ECO123445		8
BASAL	SRR1186782	ECO2210S4C1		5
BASAL	SRR1178257	ECOAZTG60318		5
FQR	SRR3999067	Ecol_517	blaKPC-2	8
FQR	SRR3999074	Ecol_877	blaKPC-3	9
BASAL	ERR1656423	Ecoli_R38		0
BASAL	GCA_002166535.1	EcStrain41-4p		3
FQR	GCA_001615675.1	EcSwine33		8
FQR	ERR435231	eo1314		9
FQR	ERR434570	eo144		11
FQR	ERR439538	eo145		11
FQR	ERR439619	eo1570		5
FQR	ERR474172	eo2921		10
FQR	ERR486710	eo2929		11
BASAL	ERR435371	eo3515		0
FQR	ERR1228320	EuSCAPE_ES022	blaOXA-48	11
OXA181	ERR1374952	EuSCAPE_SC020	blaOXA-181	15
FQR	GCA_002223465.1	FC10249		6
FQR	GCA_002223655.1	FC10275		9
FQR	GCA_002222945.1	FC11893		11
FQR	GCA_002589795.1	FDAARGOS_433	blaOXA-181+NDM-5	13
BASAL	SRR2970227	FSIS210115768		0
FQR	SRR3098818	GN02380		6
FQR	SRR1508875	H1250		12
FQR	LJGI01000000	IMT28707		8
FQR	LJGD00000000	IMT30467		8
FQR	LJGE00000000	IMT31181		5
FQR	LJGF00000000	IMT31351		9
FQR	LJGG00000000	IMT31352		8
FQR	LJGJ00000000	IMT33180		6
FQR	LJGK00000000	IMT33204		8
FQR	ERR440760	IR29	blaNDM-1	10
FQR	ERR440768	IR60	blaNDM-1	9
FQR	GCA_002510175.1	K011		16
FQR	SRR2724080	K71-77	blaNDM-1	6
OXA181	GCA_002953455.1	KBN10P04869	blaOXA-181+NDM-5	18
BASAL	SRR958486	KOEGE-131-358a		2
BASAL	SRR643055	KTE163		5
BASAL	SRR647312	KTE221		5
BASAL	GCA_003027435.1	MOD1-EC4614		0
BASAL	GCA_002226545.1	MOD1-EC5679		3
BASAL	GCA_002486495.1	MOD1-EC5806		0
BASAL	SRR3987591	MOD1-EC6654		0
BASAL	GCA_002519755.1	MOD1-EC6898		5
BASAL	SRR3971177	MOD1-EC6911		0
BASAL	SRR4262712	MOD1-EC701		5
BASAL	SRR4262794	MOD1-EC704		5
FQR	LBBD00000000	Pa1s1		6
FQR	ERR1218604	PB230		4
FQR	ERR1218707	PB293		10
OXA181	ERR1218627	PB406		7
FQR	ERR1197949	R107		5
FQR	ERR1197952	R37		8
FQR	ERR1197954	R423		6
FQR	LT594504	RL465PB		2
FQR	ERR1197960	RS254		9
FQR	ERR1197961	RS288		15
FQR	ERR1197963	RS334		10
FQR	ERR1197964	RS371		9
FQR	ERR1202023	SH058		13
FQR	GCA_001616385.1	swine70		14
FQR	ERR1351670	TTSH1	blaNDM-1	4
FQR	SRR1180980	UCI53		4
FQR	ERR1197965	V139		6
FQR	ERR1197967	V177		6
FQR	ERR1197968	V210		11
FQR	ERR1036086	VRES0003		7
FQR	ERR998774	VRES0124		6
FQR	ERR1218718	W2-11-ERB9		12
FQR	GCA_002165115.1	WCHEC1	blaNDM-5	3
OXA181	GCA_002811555.1	WCHEC1943	blaNDM-5	27
OXA181	GCA_002164975.1	WCHEC26	blaNDM-5	14
FQR	GCA_002164865.1	WCHEC32	blaNDM-5	9
FQR	NZ_CP013112	YD786		0
FQR	GCA_002941305.1	YH17176		11

## Sheet: Fig. S9
Data for additional file 19 (Fig. S9). Estimated fitness of E. coli ST410 strains in rich and minimal media.
Media	Strain	AUC Exp 1	AUC Exp 2	AUC Exp 3	AUC Exp 4	AUC Exp 5	AUC Exp 6	AUC Exp 7	AUC Exp 8	AUC Exp 9	AUC Exp 10	Mean	Median
LB	ANSES32139	336.765	318.494	315.376	318.078	338.104	307.269	315.838	308.383	303.481	307.835	316.962	315.607
	CNR93G1	324.963	304.038	301.722	302.178	292.885	316.676	300.376	299.151	297.927	290.788	303.071	301.049
	CNR92B7	323.437	306.668	303.926	305.17	296.551	313.207	299.946	304.062	300.365	292.917	304.625	303.994
	CNR94G8	292.578	292.889	289.109	280.99	289.272	300.585	291.003	284.494	285.845	273.59	288.035	289.19
	CNR83B9	348.269	320.182	317.378	321.95	307.986	330.849	316.113	312.291	311.322	301.947	318.829	316.745
	EcMAD	336.284	316.676	314.429	313.192	303.675	309.851	330.011	306.613	301.222	308.415	314.037	311.522
MH	ANSES32139	350.331	351.596	348.826	377.252	349.693	350.513	370.101	343.874	347.824	345.179	353.519	350.012
	CNR93G1	346.161	328.569	329.945	326.367	323.915	324.01	355.39	335.337	327.124	328.708	332.553	328.638
	CNR92B7	358.39	333.066	329.517	334.87	331.647	359.023	338.009	332.673	328.416	336.321	338.193	333.968
	CNR94G8	342.836	341.805	366.596	345.247	341.574	348.389	368.487	348.549	342.527	344.782	349.079	345.015
	CNR83B9	375.809	349.111	358.326	353.685	358.666	347.524	385.208	359.447	352.113	354.024	359.391	356.175
	EcMAD	349.894	339.965	370.268	348.018	348.022	348.25	343.956	374.619	351.163	347.752	352.191	348.136
M9	ANSES32139	350.331	351.596	348.826	377.252	349.693	350.513	370.101	343.874	347.824	345.179	353.519	350.012
	CNR93G1	346.161	328.569	329.945	326.367	323.915	324.01	355.39	335.337	327.124	328.708	332.553	328.638
	CNR92B7	358.39	333.066	329.517	334.87	331.647	359.023	338.009	332.673	328.416	336.321	338.193	333.968
	CNR94G8	342.836	341.805	366.596	345.247	341.574	348.389	368.487	348.549	342.527	344.782	349.079	345.015
	CNR83B9	375.809	349.111	358.326	353.685	358.666	347.524	385.208	359.447	352.113	354.024	359.391	356.175
	EcMAD	349.894	339.965	370.268	348.018	348.022	348.25	343.956	374.619	351.163	347.752	352.191	348.136
